# Supplementary material for: Detection of peripheral and central sensitisation at acupoints in patients with unilateral shoulder pain in Beijing: a cross-sectional matched case–control study
Source: PubMed Central journal article supplement — BMJ Open. 2017 Jun 15;7(6):e014438. doi: 10.1136/bmjopen-2016-014438 (PMC5541597; doi:10.1136/bmjopen-2016-014438), 2017-06-15
Supplement: bmjopen-2016-014438.draft_revisions.pdf [file bmjopen-2016-014438.draft_revisions.pdf]

# BMJ Open

## The existence of peripheral and central sensitization at acupoints in patients with unilateral shoulder pain

|                                 |                                                                                                                                                                                                                                                                                                                                                                                                                                                                                                                                                                                                                                                                                                                                                                                                                                                                                                                                                                                                                    |
|---------------------------------|--------------------------------------------------------------------------------------------------------------------------------------------------------------------------------------------------------------------------------------------------------------------------------------------------------------------------------------------------------------------------------------------------------------------------------------------------------------------------------------------------------------------------------------------------------------------------------------------------------------------------------------------------------------------------------------------------------------------------------------------------------------------------------------------------------------------------------------------------------------------------------------------------------------------------------------------------------------------------------------------------------------------|
| Journal:                        | <i>BMJ Open</i>                                                                                                                                                                                                                                                                                                                                                                                                                                                                                                                                                                                                                                                                                                                                                                                                                                                                                                                                                                                                    |
| Manuscript ID                   | bmjopen-2016-014438                                                                                                                                                                                                                                                                                                                                                                                                                                                                                                                                                                                                                                                                                                                                                                                                                                                                                                                                                                                                |
| Article Type:                   | Research                                                                                                                                                                                                                                                                                                                                                                                                                                                                                                                                                                                                                                                                                                                                                                                                                                                                                                                                                                                                           |
| Date Submitted by the Author:   | 29-Sep-2016                                                                                                                                                                                                                                                                                                                                                                                                                                                                                                                                                                                                                                                                                                                                                                                                                                                                                                                                                                                                        |
| Complete List of Authors:       | Yan, Chao-qun; Beijing Hospital of Traditional Chinese Medicine affiliated to Capital Medical University, Acupuncture and Moxibustion Department beijing, CN<br>Zhang, Shuai; Beijing Hospital of Traditional Chinese Medicine affiliated to Capital Medical University, Acupuncture and Moxibustion Department<br>Li, Qian-Qian; Beijing Hospital of Traditional Chinese Medicine affiliated to Capital Medical University,<br>Zhang, Liwen; Shandong University of Traditional Chinese Medicine<br>Wang, Xue-Rui; Beijing Hospital of Traditional Chinese Medicine affiliated to Capital Medical University, Acupuncture and Moxibustion Department<br>Fu, Qing-Nan; Beijing Hospital of Traditional Chinese Medicine affiliated to Capital Medical University,<br>Shi, Guangxia; Beijing Hospital of Traditional Chinese Medicine affiliated to Capital Medical University, Acupuncture and Moxibustion Department<br>LIU, Cunzhi; Beijing Hospital of Traditional Chinese Medicine , Department of acupuncture |
| <b>Primary Subject Heading</b>: | Complementary medicine                                                                                                                                                                                                                                                                                                                                                                                                                                                                                                                                                                                                                                                                                                                                                                                                                                                                                                                                                                                             |
| Secondary Subject Heading:      | Rehabilitation medicine                                                                                                                                                                                                                                                                                                                                                                                                                                                                                                                                                                                                                                                                                                                                                                                                                                                                                                                                                                                            |
| Keywords:                       | Pain management < ANAESTHETICS, Rehabilitation medicine < INTERNAL MEDICINE, COMPLEMENTARY MEDICINE                                                                                                                                                                                                                                                                                                                                                                                                                                                                                                                                                                                                                                                                                                                                                                                                                                                                                                                |
|                                 |                                                                                                                                                                                                                                                                                                                                                                                                                                                                                                                                                                                                                                                                                                                                                                                                                                                                                                                                                                                                                    |

SCHOLARONE™  
Manuscripts

1  
2  
3 **The existence of peripheral and central sensitization at acupoints in patients**  
4  
5  
6 **with unilateral shoulder pain**  
7

8  
9 Chao-Qun Yan<sup>1</sup>, Shuai Zhang<sup>1</sup>, Qian-Qian Li<sup>1</sup>, Li-Wen Zhang<sup>2</sup>, Xue-Rui Wang<sup>1</sup>, Qing-Nan Fu<sup>1</sup>,  
10  
11 Guang-Xia Shi<sup>1</sup>, Cun-Zhi Liu<sup>1\*</sup>  
12  
13

- 14 1. Acupuncture and Moxibustion Department, Beijing Hospital of Traditional Chinese Medicine  
15 Affiliated to Capital Medical University, 23 Meishuguanhou Street, Dongcheng District, Beijing  
16 100010, China.  
17  
18 2. Shandong University of Traditional Chinese Medicine, Jingshi Street, Lixia District, Jinan 250014,  
19 China.  
20  
21  
22

23 \*Corresponding author at: Acupuncture and Moxibustion Department, Beijing Hospital of  
24 Traditional Chinese Medicine Affiliated to Capital Medical University, 23 Meishuguanhou  
25 Street, Dongcheng District, Beijing 100010, China. Tel: 0086-010-52176043; Fax: 0086-010-  
26 52176813.  
27  
28  
29

30  
31 E-mail address: [lcz623780@126.com](mailto:lcz623780@126.com)  
32

33 Word count: 3739  
34  
35  
36  
37  
38  
39  
40  
41  
42  
43  
44  
45  
46  
47  
48  
49  
50  
51  
52  
53  
54  
55  
56  
57  
58  
59  
60

## Abstract

**Objective**—To investigate the pattern of experimental pain responses at acupoints in clinical patients with unilateral shoulder pain.

**Design**—A purely observational design.

**Setting**—Acupuncture and Moxibustion Department, Beijing Hospital of Traditional Chinese Medicine Affiliated to Capital Medical University.

**Participants**—Volunteer sample of 60 participants (30 clinical patients with unilateral shoulder pain, 30 healthy participants).

**Interventions**—Not applicable.

**Main Outcome Measures**—Pressure-pain thresholds (PPTs) were measured at four acupoints, including Tianzong (SI 11), Jianliao (SJ 14), Jianyu (LI 15) and Jianzhen (SI 9) on the painful/non-painful side in patients with or without unilateral shoulder pain, respectively. The correlations between peripheral sensitization indexes (PSI) and central sensitization indexes (CSI) were compared in this study.

**Results**—The analysis revealed significantly lower PPT values at acupoints on the painful side compared with non-painful side in clinical patients ( $P < 0.05$ ). Meanwhile, PPTs on the non-painful side of clinical patients were diminished compared to ipsilateral side of the healthy participants ( $P < 0.05$ ). No distinct differences of PPT values were found at non-acupoint among the painful/non-painful side in clinical patients and ipsilateral side of the healthy participants ( $P > 0.05$ ). Additionally, it was observed that the pressure pain assessment acupoints have strong association between the PSI and CSI, and three acupoints of SJ 14, LI 15 and SI 9 showed correlation in PSI or CSI particularly.

**Conclusion**—The results suggest the presence of peripheral and central sensitization at acupoints in participants with unilateral shoulder pain. There exists obvious relationship among the three acupoints of SJ 14, LI 15 and SI 9, which are usually chosen to treat the shoulder pain. The results provide the evidence for acupoints selection to treat shoulder pain by acupuncture.

**Keywords:** acupoints; peripheral sensitization; central sensitization; pressure pain threshold; shoulder pain

### Strengths and limitations of this study

The strength of this study was to support the alteration in both peripheral and central sensitization at acupoints in patients with musculoskeletal pain.

The association between peripheral sensitization and central sensitization was observed at the pressure pain assessment acupoints.

Furthermore, three acupoints of Jianliao (SJ 14), Jianyu (LI 15) and Jianzhen (SI 9), which are usually chosen to treat the shoulder pain, exists obvious relationship.

And the peripheral and central sensitization at acupoints was seemed to occur correlatively with sex and independently from other baseline variable.

The limitation of this study was the only pressure pain assessment performed at acupoints, which might be inadequate to describe the complexity of pain perception.

### INTRODUCTION

Acupuncture is one of the most widely-used complementary and alternative medicines. There are about 183 countries adopting acupuncture treatment according to a survey conducted by the World Federation of Acupuncture and Moxibustion Societies in 2013 [1]. The WHO reports that the acupuncture treatment can be beneficial for more than 40 disorders. Pain is one of those disorders, which is particularly sensitive to acupuncture. The evidence in reviews demonstrates that acupuncture treatment can reduce clinical pain effectively in multiple clinical trials [2-4]. Recently, a meta-analysis reported that shoulder pain, low back pain, neck pain, osteoarthritis and chronic headache can be alleviated significantly after acupuncture treatment [5]. Shoulder pain is the third most common musculoskeletal disorder, of which the prevalence rate varies from 6.9% to 26% for point prevalence and even increases to 66.7% for lifetime prevalence in the general population [6, 7]. In our previous study, we identified acupuncture treatment can alleviate shoulder pain, particularly in special acupoints (data unpublished).

Acupoints are some special sites, which distribute at precise locations and lie on ‘meridians’ without a physical structure. According to the theory of meridians in traditional Chinese medicine, it is well known that the acupoints reflect the disorder of visceral conditions. Many studies have observed visceral lesions result in changed pain perception of some special

1  
2  
3 acupoints on the body surface [8]. Ben et al assessed the phenomenon of experimental pain-  
4 sensitive points in patients with gastric ulcer or gastritis and found some special acupoints were  
5 more sensitive than other areas [9]. Nevertheless, whether acupoints behave more sensitively  
6 under musculoskeletal pain has not been described detailedly in previous studies.  
7  
8  
9

10 We performed a multicenter, single blind, factorial randomized controlled clinical trial  
11 previously. The phenomenon that the pain threshold decreased at related acupoints of the patients  
12 with unilateral shoulder pain was widespread. Therefore, we chose some patients to detect  
13 whether acupoints are hypersensitivity in musculoskeletal pain disease.  
14  
15  
16  
17

18 Sensitization is a nervous system phenomenon that can occur in conjunction with pain [10].  
19 When sensitization is present, there are two types of hypersensitivity including peripheral and  
20 central sensitization. Peripheral sensitization is defined as the broadening of nociception in pain  
21 perception during activities or movements, where would be not painful [11]. Central sensitization  
22 refers to hypersensitivity in non-affected tissues [12]. The primary aim of this study is to  
23 examine whether acupoints exist peripheral or central sensitization phenomenon in patients with  
24 unilateral shoulder pain. Index variables are used as the indicator of the sensitivity of peripheral  
25 and central sensitization in patients with chronic musculoskeletal pain [13]. The second aim of  
26 this study is to compute the peripheral and central sensitization index of acupoints on the surface  
27 of patients with unilateral shoulder pain.  
28  
29  
30  
31  
32  
33  
34  
35

## 36 **METHODS AND ANALYSIS**

### 37 **Participants**

38  
39  
40  
41 Clinical patients—This study recruited both of clinical and healthy participants. All  
42 participants provided informed consent before participation. The Research Ethical Committee of  
43 Beijing Hospital of Traditional Chinese Medicine Affiliated to Capital Medical University  
44 approved the trial. All participants need signed informed consent form.  
45  
46  
47

48 The inclusion criteria included presenting with one-sided shoulder pain for at least six weeks  
49 and up to two years, reporting the pain intensity > 50 mm on a visual analogue scale (VAS), and  
50 the painful sites on affected side in clinical patients do not overlap the pressure pain assessment  
51 sites. The individuals were chosen from the 164 patients, who have not received acupuncture or  
52 other analgesic therapies in the preceding month.  
53  
54  
55  
56  
57  
58  
59  
60

1  
2  
3 The exclusion criteria are as follows: pain in bilateral shoulder; referred pain from the cervical  
4 spine; previous history of shoulder surgery, stroke or ipsilateral breast surgery; heart diseases and  
5 severe hypertension; osteoarthritis of the glenohumeral joint or systemic bone and joint disorder  
6 (rheumatoid arthritis); endocrine diseases such as hyperthyroidism; severe infection; undergoing  
7 current therapy involving analgesics and especially major illness depression.  
8  
9

10  
11  
12 Healthy participants—Healthy participants were age- and sex-matched to clinical patients.  
13 Healthy participants were recruited from the University of Capital Medical campus via posted  
14 flyers and general advertisements. Participants were eligible if they not currently performing  
15 resistance exercise for the upper extremity. Participants were excluded based on the following  
16 criteria: receiving acupuncture or other analgesic therapies in the preceding month, experiencing  
17 neck or shoulder pain, having the history of shoulder surgery or neurological impairments of the  
18 upper extremity, and taking pain medication currently.  
19  
20  
21  
22  
23  
24

### 25 **Protocol**

26  
27 This study was a purely observational design. All participants completed a packet of  
28 questionnaires including demographic data (age, sex, race, hand dominance) and psychological  
29 information. Clinical patients were initially examined by a researcher who assessed the  
30 compliance using the inclusion and exclusion criteria. Beck Depression Inventory (BDI) is a  
31 multiple choice self-reported inventory for measuring the severity of depression [14]. If the BDI  
32 outcome is more than 4, the participants will be excluded. Clinical pain intensity was assessed by  
33 VAS, which consist line of 0–100 mm: 0 representing ‘no pain at all’ and 100 mm representing  
34 ‘the most intense pain imaginable’. If the VAS outcome is over 50 mm, the clinical patients will  
35 be included.  
36  
37  
38  
39  
40  
41  
42  
43

44 After finishing the questionnaires, both shoulders of participants were exposed and marked the  
45 measurement sites. An expertly acupuncturist was responsible for the operation. Five points were  
46 marked in unilateral in this study and shown in Figure 1 and Appendix Table 1. To assess the  
47 pain sensitivity of acupoints, four acupoints Jianliao (SJ 14), Jianyu (LI 15), Jianzhen (SI 9), and  
48 Tianzong (SI 11) were marked bilaterally with a maker pen drawing a circle (Figure 1. A. B). To  
49 assess the pain sensitive in the non-acupoint, 2 cm down to Tianzong (SI 11) was marked  
50 bilaterally in participants (Figure 1. B).  
51  
52  
53  
54  
55  
56  
57  
58  
59  
60

### Measurement of pressure pain thresholds (PPT)

Both shoulders were exposed for examination. The participants were asked to take a prone position on the examination bed with a suitable pillow under the chest when Jianzhen (SI 9), Tianzong (SI 11) and non-acupoint were measured. Then the participants were required sitting on a chair with a researcher to keep the arm and shoulder in parallel when Jianliao (SJ 14) and Jianyu (LI 15) were measured.

PPT is widely used to evaluate the pain sensory threshold for patients with shoulder pain [15]. The lower value of PPT indicates the decreased nociceptive threshold of pain perception, and signifies the presence of sensitization [16]. A handheld electronic pressure algometer (Wagner Instruments, Greenwich, CT) mounted with a 1 cm<sup>2</sup> rubber tipped plunger was used in this study. The probe was held perpendicular to marked points bilaterally, and the pressure was increased at a rate of 30kPa/s, in order to avoid potential skin penetration. All participants were instructed to indicate when the pressure became painful, at the same time the pressure was immediately stopped and the digits were recorded. PPT was calculated as the mean of three trials on each point. There was approximately 2 min interval between the repetitions. The operator should not be told which side is the painful shoulder of the participants.

### Data Analysis

All data were entered into SPSS 17.0 software. The distributed data were used parametric statistical test if it agreed with normal distribution. Otherwise, the data were used non-parametric statistical test. Data were presented as mean  $\pm$  standard deviation (SD). Significance level was determined by  $P < 0.05$  for all data.

Firstly, we compared the experimental pain responses between the painful side and non-painful side of clinical patients. The independent t-test was used to compare the difference between the painful side and non-painful side at the pressure pain assessment sites. Then, we performed the comparison of mechanical pain sensitivity on the non-painful side of clinical patients to the ipsilateral side of the healthy participants. Pair t-test was performed to analyze the data.

In addition, we used peripheral and central sensitization index to determine whether pain-sensitivity existed at the pressure pain assessment sites. We computed a standardized score ( $z$ -

1  
2  
3 score) using the different value of raw score (clinical patients) minus mean (healthy participants)  
4 and then dividing standard deviation (healthy participants) for each clinical participant. We  
5 examined a clinical participant's ratio response for PPT in painful side fell below the 25th  
6 percentile of non-painful side which would indicate peripheral sensitization. The ratio responses  
7 were referred as the peripheral sensitization index (PSI). We computed a similar standardized (z-  
8 score) for each clinical patient by using the healthy participant's mean and standard deviation,  
9 which can indicate the central sensitization when clinical participant's averaged responses for  
10 PPT in non-painful side fell below the 25th percentile of the ipsilateral side of healthy  
11 participants. The ratio responses were named as the central sensitization indices (CSI). The 25th  
12 percentile was suggested as a lower limit reference value for enhanced sensitivity. Each index  
13 was examined by the Pearson's r correlation. We analyzed association between sensitization  
14 subgroups and the relevant baseline characteristics including demographic and clinical variables.  
15 Comparisons among the variables were examined using one way analysis of variance or Chi-  
16 square and assessment of 95% confidence intervals (CI).  
17  
18  
19  
20  
21  
22  
23  
24  
25  
26

## 27 28 **RESULTS**

### 29 30 **Recruitment and baseline characteristics**

31  
32  
33 Between January 2014 and September 2014, forty individuals were chosen from 164 patients  
34 who had experienced chronic unilateral shoulder pain, of which thirty (11 males and 19 females)  
35 were screened for eligibility criteria (Table 1). The average age of thirty patients who agreed to  
36 participate was  $50.4 \pm 12.3$  years. The healthy participants included 11 males and 19 females  
37 with age ranging from 25 to 65 years with a mean age of  $50.4 \pm 12.3$  years. All participants were  
38 right hand dominant.  
39  
40  
41  
42  
43  
44  
45  
46  
47  
48  
49  
50  
51  
52  
53  
54  
55  
56  
57  
58  
59  
60



**Table 1.** Baseline characteristics of the clinical patients and healthy participants.

|                       | Clinical Patients (N = 30) | Healthy Participants (N = 30) |
|-----------------------|----------------------------|-------------------------------|
| Age (years)           | 50.60±12.19                | 50.63±12.20                   |
| Sex (N of females)    | 19                         | 19                            |
| Race (number of Han)  | 30                         | 30                            |
| Pain duration (weeks) | 19.07 ± 16.99              | -                             |
| VAS                   | 66.17±14.60                | -                             |

Values represented as N, mean ± SD. Abbreviations: N – Number, SD – Standard Deviation, VAS – Visual Analogue Scale, BDI – Beck Depression Inventory.

### PPT comparison of related acupoints

For clinical patients, lower PPT level was detected at acupoints on the painful side compared with the non-painful side (Table 2). The differences were 94.9 (95% CI, 15.98 to 173.82;  $p = 0.02$ ) at Tianzong (SI 11), 102.91 (95% CI, 5.20 to 200.62;  $p = 0.04$ ) at Jianliao (SJ 14), 91.19 (95% CI, 13.35 to 169.03;  $p = 0.02$ ) at Jianyu (LI 15), and 86.79 (95% CI, 170.11 to 3.46;  $p = 0.04$ ) at Jianzhen (SI 9), respectively.

The PPT value difference between the non-painful side of clinical patients and the ipsilateral side of healthy participants was also compared. PPT at the acupoints on non-painful side of clinical patients was lower than on the ipsilateral side of healthy participants. The differences were 57.71 (95% CI, 24.72 to 90.70;  $p = 0.001$ ) at Tianzong (SI 11), 81.03 (95% CI, 41.40 to 120.67;  $p < 0.001$ ) at Jianliao (SJ 14), 72.2 (95% CI, 10.90 to 133.50;  $p = 0.02$ ) at Jianyu (LI 15), and 88.09 (95% CI, 39.87 to 136.30;  $p = 0.001$ ) at Jianzhen (SI 9), respectively.

**Table 2.** Pressure pain threshold values for the clinical patients and healthy participants.

|                  | Clinical Patients |                  | Painful side vs Non-painful Side |         | Health Participants | Non-painful Side vs Ipsilateral Side |         |
|------------------|-------------------|------------------|----------------------------------|---------|---------------------|--------------------------------------|---------|
|                  | Painful Side      | Non-painful Side | Mean (95% CI)                    | P value | Ipsilateral Side    | Mean (95% CI)                        | P value |
| Tianzong (SI 11) | 414.83±135.61     | 509.73±168.05    | 94.9 (15.98, 173.82)             | 0.02    | 567.44±153.84       | 57.71 (24.72, 90.70)                 | 0.001   |
| Jianliao (SJ 14) | 469.70±181.07     | 572.61±196.71    | 102.91(5.20, 200.62)             | 0.04    | 653.64±211.50       | 81.03 (41.40, 120.67)                | <0.001  |
| Jianyu (LI 15)   | 434.79±140.39     | 525.98±160.16    | 91.19 (13.35, 169.03)            | 0.02    | 598.18±181.76       | 72.2 (10.90, 133.50)                 | 0.02    |
| Jianzhen (SI 9)  | 453.08±154.54     | 539.87±167.59    | 86.79 (170.11, 3.46)             | 0.04    | 627.96±209.67       | 88.09 (39.87, 136.30)                | 0.001   |
| Non-acupoint     | 521.34±147.02     | 538.67±153.89    | 17.33 (-60.46, 95.10)            | 0.66    | 549.18±143.66       | 10.51 (-18.87, 39.89)                | 0.47    |

Values represented as mean ± SD. The unit of values was Kpa. Abbreviations: SD – Standard Deviation, CI –Confidence Intervals.

### PPT comparison of non-acupoint

Figure 2 showed PPT at the non-acupoint. For clinical patients, the analysis revealed no obvious difference of 17.33 (95% CI, -60.46 to 95.10;  $p = 0.66$ ) in PPT value on the painful side compared to the non-painful side. Meanwhile, no significant difference of PPT level, which behaved 10.51 (95% CI, -18.87 to 39.89;  $p = 0.47$ ), was found between the non-painful side of clinical patients and the ipsilateral side of healthy participants.

### Peripheral Sensitization Index

All measured acupoints demonstrated side-to-side difference in clinical patients. Then they were used to compute peripheral sensitization index (PSI). PPT values at acupoints on painful side below the 25th percentile of the non-painful side would indicate peripheral sensitization. The ratios of clinical patients with peripheral sensitization were 77% at Tianzong (SI 11), 37% at Jianliao (SJ 14), 13% at Jianyu (LI 15) and 60% at Jianzhen (SI 9) (Table 3). Significant correlation (Appendix Table 2) was observed in PSI among Jianliao (SJ 14), Jianyu (LI 15) and Jianzhen (SI 9) ( $p < 0.01$ ). Correlation between PSI and sex at all the pressure pain assessment acupoints approached statistical significance ( $p < 0.01$ ), and there was no significant association between PSI and other baseline variables (Appendix Table 3).

**Table 3.** Frequencies meeting the peripheral sensitization index (PSI) and central sensitization index (CSI) based on PPT response.

| Sites            | PSI      | CSI      | PSI×CSI  |
|------------------|----------|----------|----------|
| Tianzong (SI11)  | 23 (77%) | 13 (43%) | 13 (43%) |
| Jianliao (SJ 14) | 11 (37%) | 17 (57%) | 9 (30%)  |
| Jianyu (LI 15)   | 13 (43%) | 19 (63%) | 12 (40%) |
| Jianzhen (SI 9)  | 18 (60%) | 18 (60%) | 15 (50%) |

Values are individual counts (percentages). Abbreviations: PPT – Pressure-pain threshold.

### Central Sensitization Index

Four measured acupoints demonstrated difference between the painful side of clinical patients and the ipsilateral side of healthy participants. Therefore, they used to compute central

1  
2  
3 sensitization index (CSI). The responses of clinical patients were 43% at Tianzong (SI 11), 57%  
4 at Jianliao (SJ 14), 63% at Jianyu (LI 15) and 60% at Jianzhen (SI 9) (Table 3). Meanwhile,  
5 distinct significant association (Appendix Table 4) was observed among Jianliao (SJ 14), Jianyu  
6 (LI 15) and Jianzhen (SI 9) in CSI ( $p < 0.01$ ). Appendix Table 5 showed that correlations  
7 between CSI and sex at Tianzong (SI 11), Jianliao (SJ 14), Jianyu (LI 15), and Jianzhen (SI 9)  
8 approached statistical significance ( $p < 0.01$ ).  
9  
10  
11  
12  
13

### 14 **Comparison of Peripheral and Central Sensitization Index**

15

16 The frequencies of clinical patients who had both PSI and CSI were 43% at Tianzong (SI 11),  
17 30% at Jianliao (SJ 14), 40% at Jianyu (LI 15) and 50% at Jianzhen (SI 9), respectively (Table 3).  
18 Significant correlation was observed between PSI and CSI in all the pressure pain assessment  
19 acupoints (Appendix Table 6). Table 4 showed that association between subgroups and sex  
20 approached statistical significance at the assessment acupoints ( $p < 0.001$ ). No significant  
21 association was observed between subgroups and other baseline variable ( $p > 0.05$ ).  
22  
23  
24  
25  
26  
27  
28  
29  
30  
31  
32  
33  
34  
35  
36  
37  
38  
39  
40  
41  
42  
43  
44  
45  
46  
47  
48  
49  
50  
51  
52  
53  
54  
55  
56  
57  
58  
59  
60

**Table 4** Demographic, clinical, and psychological characteristics of sensitization groups.

|                         | Peripheral Sensitization | Central Sensitization | Peripheral and Central Sensitization | No Sensitization     | P value |
|-------------------------|--------------------------|-----------------------|--------------------------------------|----------------------|---------|
| <b>Tianzong (SI11)</b>  |                          |                       |                                      |                      |         |
| Age (years)             | 48.78 (43.45, 54.21)     | 50.38 (44.02, 56.75)  | 50.38 (44.02, 56.75)                 | 56.57 (48.00, 65.15) | 0.47    |
| Sex (%females)          | 78.28 (56.14, 92.52)     | 76.92 (46.16, 94.89)  | 76.92 (46.16, 94.89)                 | 14.29 (3.68, 57.62)  | <0.001  |
| Pain duration (weeks)   | 21.04 (12.91, 29.17)     | 24.31 (10.23, 38.38)  | 24.31 (10.23, 38.38)                 | 12.57 (7.16, 17.99)  | 0.60    |
| VAS                     | 68.04 (61.25, 74.84)     | 71.15 (62.77, 79.53)  | 71.15 (62.77, 79.53)                 | 60.00 (52.45, 67.55) | 0.34    |
| <b>Jianliao (SJ 14)</b> |                          |                       |                                      |                      |         |
| Age (years)             | 48.09 (38.47, 57.71)     | 49.59 (43.35, 55.82)  | 48.89 (38.97, 58.81)                 | 53.27 (46.22, 60.33) | 0.78    |
| Sex (%females)          | 100                      | 82.35 (56.42, 96.62)  | 100                                  | 27.27 (6.01, 60.95)  | <0.001  |
| Pain duration (weeks)   | 22.55 (10.81, 34.28)     | 23.29 (12.80, 33.79)  | 22.22 (7.96, 36.49)                  | 11.64 (7.07, 16.21)  | 0.32    |
| VAS                     | 70.00 (59.17, 80.83)     | 68.82 (61.14, 76.51)  | 72.22 (59.60, 84.84)                 | 63.18 (53.41, 72.95) | 0.59    |
| <b>Jianyu (LI 15)</b>   |                          |                       |                                      |                      |         |
| Age (years)             | 46.92 (38.29, 55.56)     | 47.47 (41.20, 53.75)  | 45.42 (36.64, 54.19)                 | 55.10 (48.95, 61.25) | 0.32    |
| Sex (%females)          | 92.31 (63.76, 99.81)     | 89.47 (66.90, 98.70)  | 100                                  | 20.00 (2.54, 55.41)  | <0.001  |
| Pain duration (weeks)   | 19.69 (9.51, 29.87)      | 21.89 (12.14, 31.65)  | 20.67 (9.73, 31.60)                  | 14.80 (9.23, 20.37)  | 0.76    |
| VAS                     | 68.46 (59.62, 77.30)     | 66.84 (59.65, 74.04)  | 66.67 (57.96, 75.38)                 | 62.50 (53.38, 71.62) | 0.79    |
| <b>Jianzhen (SI 9)</b>  |                          |                       |                                      |                      |         |
| Age (years)             | 48.22 (41.53, 54.91)     | 48.00 (41.35, 54.65)  | 46.27 (38.65, 53.88)                 | 53.33 (45.49, 61.17) | 0.64    |
| Sex (%females)          | 83.33 (58.57, 96.44)     | 83.33 (58.57, 96.44)  | 93.33 (67.97, 99.83)                 | 33.33 (7.45, 70.06)  | <0.001  |
| Pain duration (weeks)   | 17.11 (9.58, 24.64)      | 18.22 (10.77, 25.67)  | 18.67 (9.70, 27.63)                  | 24.00 (6.74, 41.26)  | 0.78    |
| VAS                     | 67.78 (60.43, 75.13)     | 66.67 (58.85, 74.48)  | 68.00 (59.32, 76.68)                 | 65.00 (53.79, 76.21) | 0.97    |

Values presented as % (for sex) or mean with [95% CI]. Abbreviations: VAS – Visual Analogue Acale.

## DISCUSSION

The current results were in agreement with a peripherally sensitized state at acupoints which is determined by the side-to-side difference of PPT values in clinical patients with unilateral shoulder pain. Central sensitization at acupoints was conducted by comparing pressure sensitivity in patients with unilateral shoulder pain with healthy age- and sex-matched participants. No obvious PPT values difference was found at the non-acupoint among the painful side, non-painful side and ipsilateral side. To advance this line of research, association between peripheral and central sensitization at acupoints was examined in this paper. We found that individuals behaved significant association between peripheral and central sensitization at acupoints. This finding demonstrated that there existed two pattern of sensitization in acupoints. In addition, three acupoints Jianliao (SJ 14), Jianyu (LI 15) and Jianzhen (SI 9) that normally be used for treating shoulder pain had correlation.

Previous investigations had reported that splanchnic diseases can induce mechanical hyperalgesia on the corresponding acupoints when pressed [17]. Acupoints turned to the “activated mode” or “sensitized mode” from the “silent mode” in pathological condition. This phenomenon is called “acupoint sensitization”. Some acupoints appeared the hypersensitivity of temperature (heat-sensitization) or pain threshold (pain-sensitization) under visceral pain [8, 18]. But unlike those studies, we examined acupoints in patients with musculoskeletal pain in this study. The contribution of this study proves the existence of peripheral and central sensitization at acupoints under musculoskeletal pain, and manifests the pain sensitivity of acupoints are dynamic, by comparing the clinical patients with healthy participants.

Collectively, the findings of the current paper were to support the alteration in both peripheral and central sensitization at acupoints in patients with musculoskeletal pain. To determine whether peripheral and central sensitization were more likely to occur together or alone, we used sensitization indexes to explore the phenomenon. The results demonstrated the PSI and CSI presented association at all the pressure pain assessment acupoints. In PSI or CSI, a strong association was found at three acupoints of Jianliao (SJ 14), Jianyu (LI 15) and Jianzhen (SI 9). No distinct association was found between Tianzong (SI 11) and other acupoints by comparing PSI or CSI. From the clinical perspective, Jianliao (SJ 14), Jianyu (LI 15) and Jianzhen (SI 9) were so frequent to be choose to treat shoulder pain in clinical practice, that they were named

1  
2  
3 “shoulder three acupoints” by acupuncturists [19, 20]. According to classical acupuncture theory,  
4 it is believed that the shoulder pain with limited movement of lifting, abduction and backward  
5 extension was mainly caused by the disorder of the Large Intestine Channel and the Small  
6 Intestine Channel. Jianyu (LI 15), Jianliao (SJ 14) and Jianzhen (SI 9), are highly-refined  
7 acupoints to treat shoulder pain in the clinic, and have been proved to be effective to regulate  
8 muscle strength and tension of shoulder joint [21]. The result of the strong association among  
9 three acupoints of Jianliao (SJ 14), Jianyu (LI 15) and Jianzhen (SI 9) is consistent with the  
10 conception of traditional Chinese medicine and proved evidence for the clinical experience.  
11  
12  
13  
14  
15  
16  
17

18 In result, we found peripheral and central sensitization had association with sex rather than age,  
19 pain duration or VAS. Gender differences in pain has become an increased topic in recent years,  
20 and lower PPT value in women than in men was found either in healthy subjects or clinical  
21 patients [22]. Our study also provides evidence for gender differences of lower PPT in women at  
22 acupoints. Specifically, the result indicates that peripheral and central sensitization at acupoints  
23 is not relevant to pain duration, and suggests that peripheral sensitization is not a prerequisite for  
24 the presence of central sensitization at acupoints. Moreover, there is no obvious evidence that the  
25 pattern of sensitization has relation with the degree of severity of the clinical condition as  
26 measured by VAS. These changes are consistent with the idea of traditional Chinese medicine  
27 that acupoints are the crucial reflex points of body lesions under pathological circumstance.  
28 Hyperalgesia and skin sensitization can occur at corresponding acupoints when under some  
29 diseases [23]. Morphological structure studies have reported that the nervous system and blood  
30 vessels might have a close relationship with acupoints [24-26]. For example, abundant  
31 microvessels existed at the acupoints of Zhongji (RN3) and Zusanli (ST36) in contrast to the  
32 surrounding tissues [27]. The acupoints also have a high density of nerve endings including A-  
33 and C- afferent fibers [28, 29]. Those characteristics of higher concentration of neural, vascular  
34 elements and mast cells could make pain perception more sensitive, and might contribute to  
35 peripheral sensitivity. To confirm the specificity of acupoints, we selected a non-acupoint in the  
36 infraspinatus muscle. Obviously, no significant difference was found in PPT values among the  
37 painful/ non-painful side of clinical patients with unilateral shoulder pain and the ipsilateral side  
38 of healthy participants. The finding proved that acupoints become a specific reflex point that  
39 under musculoskeletal pain.  
40  
41  
42  
43  
44  
45  
46  
47  
48  
49  
50  
51  
52  
53  
54  
55  
56  
57  
58  
59  
60

1  
2  
3 There are limitations that should be kept in mind in this research. Pain perception is a  
4 multidimensional feature. PPT measurement is just a mechanical and standardized stimulation  
5 and inadequate to describe the complexity of pain perception. The multimodal approach should  
6 be used to provide the details of the pain system in both normal and pathophysiological  
7 situations, such as different stimulus modalities and quantitative assessment of various pain  
8 mechanisms. Second, our study is a small sample. It may be appropriate that larger samples  
9 provide further information about acupoints sensitivity. Third, the evaluators may not be blinded  
10 in the group practically, although we demand participants not to tell the evaluators which side is  
11 the pain side in shoulder. Further studies need to be conducted to confirm the phenomena  
12 observed here.  
13  
14  
15  
16  
17  
18  
19  
20

## 21 CONCLUSIONS

22  
23 In conclusion, there exists mixed presence of sensitization patterns at acupoints in patients  
24 with unilateral shoulder pain and a strong correlation among Jianliao (SJ 14), Jianyu (LI 15) and  
25 Jianzhen (SI 9). Future research of multimodal pain approach should be conducted, such as  
26 suprathreshold heat pain response, to determine various sensitivity mechanisms.  
27  
28  
29  
30  
31  
32

## 33 Legends

34  
35  
36 **Figure 1.** The pressure pain assessment sites in the present study. (A) Locations for the pressure  
37 pain threshold (PPT) measurement at Jianliao (SJ 14), Jianyu (LI 15) and Jianzhen (SI 9). (B)  
38 Locations for the PPT measurement at Tianzong (SI 11) and Non-acupoint.  
39  
40  
41  
42

43 **Figure 2.** The values of pressure pain threshold (PPT) at the non-acupoint. Values are mean  $\pm$   
44 SD.  
45  
46  
47  
48  
49  
50  
51  
52  
53  
54  
55  
56  
57  
58  
59  
60



## Footnotes

**Contributors** Conceived and designed the experiments: Qian-Qian Li, Cun-Zhi Liu. Performed the experiments: Guang-Xia Shi, Qing-Nan Fu, Chao-Qun Yan, Shuai Zhang. Analyzed the data: Li-Wen Zhang, Xue-Rui Wang. Wrote the paper: Chao-Qun Yan, Qian-Qian Li. All authors approved the final manuscript.

**Funding** This work was supported by Beijing Municipal Administration of Hospitals Clinical Medicine Development of Special Funding Support grant number XMLX201607 and ZYLX201412.

**Competing interests** We have read and understood BMJ policy on declaration of interests and declare that we have no competing interests.

**Ethics approval** The Research Ethical Committee of Beijing Hospital of Traditional Chinese Medicine Affiliated to Capital Medical University approved the trial.

**Patient consent** Obtained.

**Provenance and peer review** Not commissioned; externally peer reviewed.

**Data Sharing Statement** No additional data are available.

## References

1. WHO Traditional Medicine Strategy: 2014–2023. ISBN: 978 92 4 150609 0 (2013); Available at [http://www.who.int/edicines/publications/traditional/trm\\_strategy14\\_23/en/](http://www.who.int/edicines/publications/traditional/trm_strategy14_23/en/)
2. De Kooning M, Tobbackx Y, Meeus M et al. Acupuncture-Analgesia Following a Single Treatment Session in Chronic Whiplash is Unrelated to Autonomic Nervous System Changes: A Randomized Cross-over Trial. *Pain physician* 2015;18(6):527-536.
3. MacPherson H, Tilbrook H, Richmond S et al. Alexander Technique Lessons or Acupuncture Sessions for Persons With Chronic Neck Pain: A Randomized Trial. *Annals of internal medicine* 2015;163(9):653-662.
3. Fister DG, Cassileth BR, Deng GE et al. Acupuncture for pain and dysfunction after neck

- 1  
2  
3 dissection: results of a randomized controlled trial. *Journal of clinical oncology*  
4 2010;28(15):2565-2570.  
5  
6  
7 5. Vickers AJ, Cronin AM, Maschino AC et al. Acupuncture for chronic pain: individual  
8 patient data meta-analysis. *Archives of internal medicine* 2012;172(19):1444-1453.  
9  
10  
11 6. Luime JJ, Koes BW, Hendriksen IJ et al. Prevalence and incidence of shoulder pain in the  
12 general population; a systematic review. *Scand. J. Rheumatol.* 2004;33(2):73-81.  
13  
14  
15 7. Luime JJ, Koes BW, Miedem HS et al. High incidence and recurrence of shoulder and  
16 neck pain in nursing home employees was demonstrated during a 2-year follow-up. *J.*  
17 *Clin. Epidemiol.* 2005;58(4):407-413.  
18  
19  
20 8. Rong PJ, Li S, Ben H et al. Peripheral and spinal mechanisms of acupoint sensitization  
21 phenomenon. *Evidence-based complementary and alternative medicine*  
22 2013;2013:742195.  
23  
24  
25 9. Ben H, Li L, Rong PJ et al. Observation of Pain-Sensitive Points along the Meridians in  
26 Patients with Gastric Ulcer or Gastritis. *Evidence-based complementary and alternative*  
27 *medicine* 2012;2012:130802.  
28  
29  
30 10. Borstad J, Woeste C. The role of sensitization in musculoskeletal shoulder pain. *Brazilian*  
31 *journal of physical therapy* 2015;19(4):251-257.  
32  
33  
34 11. Arendt-Nielsen L, Fernandez-de-Las-Penas C, Graven-Nielsen T. Basic aspects of  
35 musculoskeletal pain: from acute to chronic pain. *The Journal of manual & manipulative*  
36 *therapy* 2011;19(4):186-193.  
37  
38  
39 12. Staud R. Is it all central sensitization? Role of peripheral tissue nociception in chronic  
40 musculoskeletal pain. *Current rheumatology reports* 2010;12(6):448-454.  
41  
42  
43 13. Coronado RA, Simon CB, Valencia C, George SZ. Experimental pain responses support  
44  
45  
46  
47  
48  
49  
50  
51  
52  
53  
54  
55  
56  
57  
58  
59  
60

- 1  
2  
3 peripheral and central sensitization in patients with unilateral shoulder pain. *The Clinical*  
4  
5  
6 *journal of pain* 2014;30(2):143-151.  
7
- 8 14. Smarr KL, Keefer AL. Measures of depression and depressive symptoms: Beck  
9 Depression Inventory-II (BDI-II), Center for Epidemiologic Studies Depression Scale  
10 (CES-D), Geriatric Depression Scale (GDS), Hospital Anxiety and Depression Scale  
11 (HADS), an Patient Health Questionnaire-9 (PHQ-9). *Arthritis care & research* 2011;63  
12 Suppl 11:S454-466.  
13
- 14 15. Ge HY, Fernandez-de-Las-Penas C, Madeleine P, Arendt-Nielsen L. Topographical  
16 mapping and mechanical pain sensitivity of myofascial trigger points in the infraspinatus  
17 muscle. *European journal of pain* 2008;12(7):859-865.  
18
- 19 16. Paul TM, Soo Hoo J, Chae J, Wilson RD. Central hypersensitivity in patients with  
20 subacromial impingement syndrome. *Arch. Phys. Med. Rehabil.* 2012;93(12):2206-2209.  
21
- 22 17. Chae Y, Kim HY, Lee HJ et al. The alteration of pain sensitivity at disease-specific  
23 acupuncture points in premenstrual syndrome. *The journal of physiological sciences*  
24 2007;57(2):115-119.  
25
- 26 18. Peles S, Miranda A, Shaker R, Sengupta JN. Acute nociceptive somatic stimulus  
27 sensitizes neurones in the spinal cord to colonic distension in the rat. *The Journal of*  
28 *physiology* 2004;560(Pt 1):291-302.  
29
- 30 19. Chen L. [A new thinking of acupuncture and moxibustion treatment of shoulder pain  
31 After hemiplegia]. *Zhongguo zhen jiu = Chinese acupuncture & moxibustion*  
32 2006;26(9):669-671.  
33
- 34 20. Li N, Tian FW, Wang CW et al. [Double-center randomized controlled trial on post-  
35 stroke shoulder pain treated by electroacupuncture combined with Tuina]. *Zhongguo zhen*  
36 *jiu = Chinese acupuncture & moxibustion* 2012;32(2):101-105.  
37  
38  
39  
40  
41  
42  
43  
44  
45  
46  
47  
48  
49  
50  
51  
52  
53  
54  
55  
56  
57  
58  
59  
60

- 1  
2  
3 21. Chen MY, Pu QQ, Liu SY, Jiang ZY. [Efficacy comparison of different stimulation  
4 therapies for periarthrititis of shoulder]. *Zhongguo zhen jiu = Chinese acupuncture &*  
5  
6 *moxibustion* 2013;33(2):109-112.  
7  
8  
9
- 10 22. Tschugg A, Loscher WN, Hartmann S et al. Gender Influences Radicular Pain Perception  
11 in Patients with Lumbar Disc Herniation. *J Womens Health* 2015;24(9):771-776.  
12  
13  
14
- 15 23. Li L, Yu L, Rong P et al. Visceral nociceptive afferent facilitates reaction of subnucleus  
16 reticularis dorsalis to acupoint stimulation in rats. *Evidence-based complementary and*  
17 *alternative medicine* 2013;2013:931283.  
18  
19  
20
- 21 24. Kuo TC, Lin CW, Ho FM. The soreness and numbness effect of acupuncture on skin  
22 blood flow. *The American journal of Chinese medicine* 2004;32(1):117-129.  
23  
24  
25
- 26 25. Zhang D, Yan X, Zhang X et al. Synchrotron radiation phase-contrast X-ray CT imaging  
27 of acupuncture points. *Analytical and bioanalytical chemistry* 2011;401(3):803-808.  
28  
29  
30
- 31 26. Wick F, Wick N, Wick MC. Morphological analysis of human acupuncture points  
32 through immunohistochemistry. *American journal of physical medicine & rehabilitation /*  
33 *Association of Academic Physiatrists* 2007;86(1):7-11.  
34  
35  
36  
37  
38
- 39 27. Oh DS, Kang W, Choi SM, Son CG. Effect of acupuncture for gastrointestinal activity  
40 differs depending on the pathophysiological condition. *Acupuncture in medicine : journal*  
41 *of the British Medical Acupuncture Society* 2011;29(4):316-317.  
42  
43  
44  
45
- 46 28. Li AH, Zhang JM, Xie YK. Human acupuncture points mapped in rats are associated  
47 with excitable muscle/skin-nerve complexes with enriched nerve endings. *Brain research*  
48 2004;1012(1-2):154-159.  
49  
50  
51  
52
- 53 29. Zhu B, Xu WD, Rong PJ et al. A C-fiber reflex inhibition induced by electroacupuncture  
54  
55  
56  
57  
58  
59

1  
2  
3 with different intensities applied at homotopic and heterotopic acupoints in rats  
4 selectively destructive effects on myelinated and unmyelinated afferent fibers. *Brain*  
5 *research* 2004;1011(2):228-237.  
6  
7  
8  
9  
10  
11  
12  
13  
14  
15  
16  
17  
18  
19  
20  
21  
22  
23  
24  
25  
26  
27  
28  
29  
30  
31  
32  
33  
34  
35  
36  
37  
38  
39  
40  
41  
42  
43  
44  
45  
46  
47  
48  
49  
50  
51  
52  
53  
54  
55  
56  
57  
58  
59  
60

For peer review only

1  
2  
3  
4  
5  
6  
7  
8  
9  
10  
11  
12  
13  
14  
15  
16  
17  
18  
19  
20  
21  
22  
23  
24  
25  
26  
27  
28  
29  
30  
31  
32  
33  
34  
35  
36  
37  
38  
39  
40  
41  
42  
43  
44  
45  
46  
47  
48  
49  
50  
51  
52  
53  
54  
55  
56  
57  
58  
59  
60

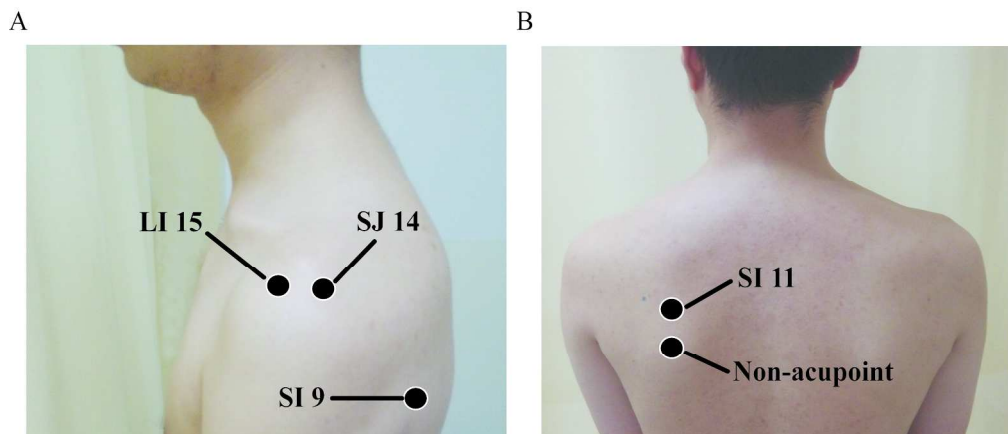

233x101mm (300 x 300 DPI)

Peer review only

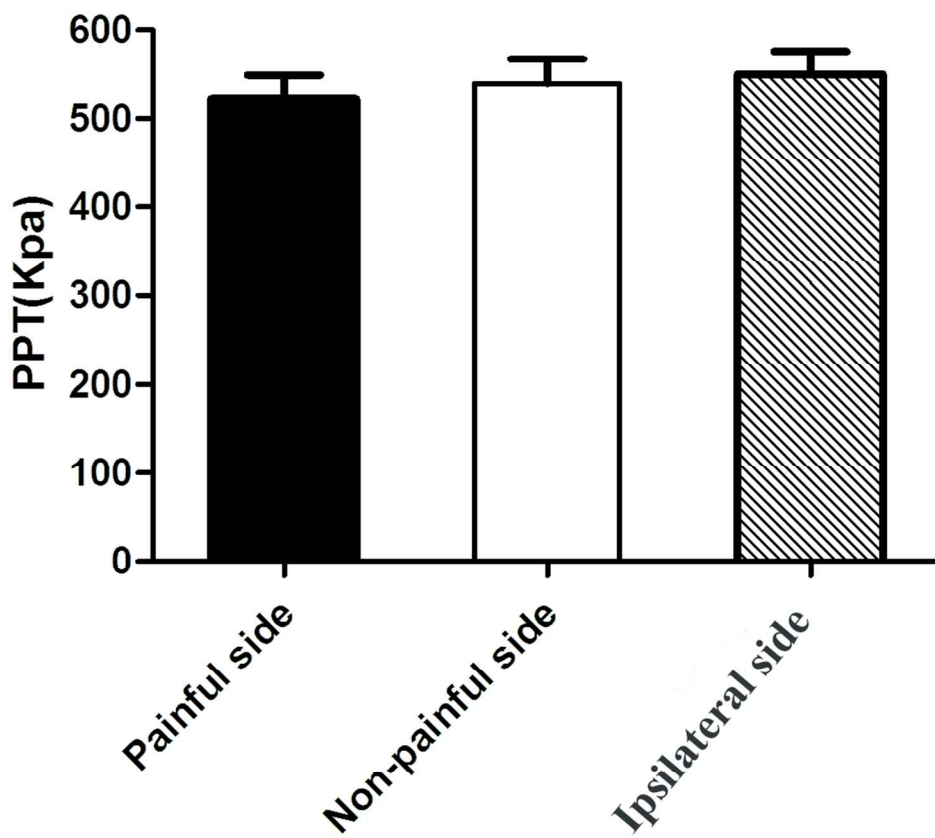

96x88mm (300 x 300 DPI)

BMJ

**Appendix Table 1.** Locations for the pressure pain assessment sites in the present study.

| Points           | Location                                                                                                                                                                                                                                                                 |
|------------------|--------------------------------------------------------------------------------------------------------------------------------------------------------------------------------------------------------------------------------------------------------------------------|
| Jianliao (SJ 14) | In the depression posterior and inferior to the acromion when arm is abducted.                                                                                                                                                                                           |
| Jianyu (LI 15)   | In the depression between the acromial extremity of the clavicle and the great tuberosity of humerus; or when the arm is in full abduction, the acupoint is in the depression at the anterior border of the acromioclavicular joint, and superior to the shoulder joint. |
| Jianzhen (SI 9)  | 1 cun directly above the posterior end of the axillary fold when the arm is abducted.                                                                                                                                                                                    |
| Tianzong (SI 11) | In the depression in the center of the subscapular fossa, at the point 1/3 of the line between the lower border of the mesoscapula and lower angle of capula.                                                                                                            |
| Non-acupoint     | 2 cm down to Tianzong (SI 11).                                                                                                                                                                                                                                           |

**Appendix Table 2.** Correlation of peripheral sensitization index (PSI) among acupoints.

|                  | PSI             |                  |                |                 |
|------------------|-----------------|------------------|----------------|-----------------|
|                  | Tianzong (SI11) | Jianliao (SJ 14) | Jianyu (LI 15) | Jianzhen (SI 9) |
| Tianzong (SI11)  | 1.00            | 0.26             | 0.32           | 0.35            |
| Jianliao (SJ 14) | 0.26            | 1.00             | 0.73*          | 0.62*           |
| Jianyu (LI 15)   | 0.32            | 0.73*            | 1.00           | 0.25            |
| Jianzhen (SI 9)  | 0.35            | 0.62*            | 0.44*          | 1.00            |

Values are Pearson's correlation. \*Significant association between variables ( $p < .01$ ).



**Appendix Table 3.** Correlation between peripheral sensitization indexes (PSI) and relevant baseline characteristics.

|                       | PSI              |                  |                |                 |
|-----------------------|------------------|------------------|----------------|-----------------|
|                       | Tianzong (SI 11) | Jianliao (SJ 14) | Jianyu (LI 15) | Jianzhen (SI 9) |
| Age (years)           | -0.28            | -0.13            | -0.21          | -0.22           |
| Sex (%females)        | -0.56*           | -0.58*           | -0.53*         | -0.51*          |
| Pain duration (weeks) | 0.21             | 0.20             | -0.10          | -0.20           |
| VAS                   | 0.24             | 0.16             | 0.27           | -0.12           |

Values are Pearson's correlation. \*Significant association between variables ( $p < 0.01$ ).

**Appendix Table 4.** Correlation of central sensitization index (CSI) among acupoints.

|                  | CSI             |                  |                |                 |
|------------------|-----------------|------------------|----------------|-----------------|
|                  | Tianzong (SI11) | Jianliao (SJ 14) | Jianyu (LI 15) | Jianzhen (SI 9) |
| Tianzong (SI11)  | 1.00            | 0.86             | 0.11           | 0.17            |
| Jianliao (SJ 14) | 0.09            | 1.00             | 0.59*          | 0.25            |
| Jianyu (LI 15)   | 0.11            | 0.59*            | 1.00           | 0.51*           |
| Jianzhen (SI 9)  | 0.17            | 0.25             | 0.51*          | 1.00            |

Values are Pearson's correlation. \*Significant association between variables ( $p < 0.01$ ).

**Appendix Table 5.** Correlation between central sensitization index (CSI) and relevant baseline characteristics.

|                       | CSI              |                  |                |                 |
|-----------------------|------------------|------------------|----------------|-----------------|
|                       | Tianzong (SI 11) | Jianliao (SJ 14) | Jianyu (LI 15) | Jianzhen (SI 9) |
| Age (years)           | -0.10            | -0.12            | -0.32          | -0.24           |
| Sex (%females)        | -0.25            | -0.45*           | -0.71*         | -0.51*          |
| Pain duration (weeks) | 0.13             | 0.29             | -0.16          | -0.05           |
| VAS                   | 0.33             | 0.21             | 0.04           | 0.01            |

Values are Pearson's correlation. \*Significant association between variables ( $p < 0.01$ ).

**Appendix Table 6.** Correlation between peripheral sensitization index (PSI) and central sensitization index (CSI).

|                  | CSI             |                  |                |                 |
|------------------|-----------------|------------------|----------------|-----------------|
|                  | Tianzong (SI11) | Jianliao (SJ 14) | Jianyu (LI 15) | Jianzhen (SI 9) |
| Tianzong (SI11)  | 0.48*           | 0.15             | 0.40*          | 0.52*           |
| Jianliao (SJ 14) | 0.17            | 3.9*             | 0.58*          | 0.62*           |
| Jianyu (LI 15)   | 0.32            | 0.36             | 0.53*          | 0.58*           |
| Jianzhen (SI 9)  | 0.17            | 0.25             | 0.65*          | 0.58*           |

Values are Pearson's correlation. \*Significant association between variables ( $p < 0.01$ ).

# BMJ Open

## The existence of peripheral and central sensitization at acupoints in patients with unilateral shoulder pain: a cross-sectional matched case-control study

|                                 |                                                                                                                                                                                                                                                                                                                                                                                                                                                                                                                                                                                                                                                                                                                                                                                                                                                                                                                                                                                                                    |
|---------------------------------|--------------------------------------------------------------------------------------------------------------------------------------------------------------------------------------------------------------------------------------------------------------------------------------------------------------------------------------------------------------------------------------------------------------------------------------------------------------------------------------------------------------------------------------------------------------------------------------------------------------------------------------------------------------------------------------------------------------------------------------------------------------------------------------------------------------------------------------------------------------------------------------------------------------------------------------------------------------------------------------------------------------------|
| Journal:                        | <i>BMJ Open</i>                                                                                                                                                                                                                                                                                                                                                                                                                                                                                                                                                                                                                                                                                                                                                                                                                                                                                                                                                                                                    |
| Manuscript ID                   | bmjopen-2016-014438.R1                                                                                                                                                                                                                                                                                                                                                                                                                                                                                                                                                                                                                                                                                                                                                                                                                                                                                                                                                                                             |
| Article Type:                   | Research                                                                                                                                                                                                                                                                                                                                                                                                                                                                                                                                                                                                                                                                                                                                                                                                                                                                                                                                                                                                           |
| Date Submitted by the Author:   | 18-Jan-2017                                                                                                                                                                                                                                                                                                                                                                                                                                                                                                                                                                                                                                                                                                                                                                                                                                                                                                                                                                                                        |
| Complete List of Authors:       | Yan, Chao-qun; Beijing Hospital of Traditional Chinese Medicine affiliated to Capital Medical University, Acupuncture and Moxibustion Department beijing, CN<br>Zhang, Shuai; Beijing Hospital of Traditional Chinese Medicine affiliated to Capital Medical University, Acupuncture and Moxibustion Department<br>Li, Qian-Qian; Beijing Hospital of Traditional Chinese Medicine affiliated to Capital Medical University,<br>Zhang, Liwen; Shandong University of Traditional Chinese Medicine<br>Wang, Xue-Rui; Beijing Hospital of Traditional Chinese Medicine affiliated to Capital Medical University, Acupuncture and Moxibustion Department<br>Fu, Qing-Nan; Beijing Hospital of Traditional Chinese Medicine affiliated to Capital Medical University,<br>Shi, Guangxia; Beijing Hospital of Traditional Chinese Medicine affiliated to Capital Medical University, Acupuncture and Moxibustion Department<br>LIU, Cunzhi; Beijing Hospital of Traditional Chinese Medicine , Department of acupuncture |
| <b>Primary Subject Heading</b>: | Complementary medicine                                                                                                                                                                                                                                                                                                                                                                                                                                                                                                                                                                                                                                                                                                                                                                                                                                                                                                                                                                                             |
| Secondary Subject Heading:      | Rehabilitation medicine                                                                                                                                                                                                                                                                                                                                                                                                                                                                                                                                                                                                                                                                                                                                                                                                                                                                                                                                                                                            |
| Keywords:                       | Pain management < ANAESTHETICS, Rehabilitation medicine < INTERNAL MEDICINE, COMPLEMENTARY MEDICINE                                                                                                                                                                                                                                                                                                                                                                                                                                                                                                                                                                                                                                                                                                                                                                                                                                                                                                                |
|                                 |                                                                                                                                                                                                                                                                                                                                                                                                                                                                                                                                                                                                                                                                                                                                                                                                                                                                                                                                                                                                                    |

SCHOLARONE™  
Manuscripts

1  
2  
3 **The existence of peripheral and central sensitization at acupoints in patients**  
4  
5  
6 **with unilateral shoulder pain: a cross-sectional matched case-control study**  
7  
8

9 Chao-Qun Yan, Shuai Zhang, Qian-Qian Li, Li-Wen Zhang, Xue-Rui Wang, Qing-Nan Fu, Guang-

10  
11 Xia Shi, Cun-Zhi Liu\*  
12

13  
14 Acupuncture and Moxibustion Department, Beijing Hospital of Traditional Chinese Medicine  
15 Affiliated to Capital Medical University, 23 Meishuguanhou Street, Dongcheng District, Beijing  
16 100010, China.  
17  
18

19 \*Corresponding author at: Acupuncture and Moxibustion Department, Beijing Hospital of  
20 Traditional Chinese Medicine Affiliated to Capital Medical University, 23 Meishuguanhou  
21 Street, Dongcheng District, Beijing 100010, China. Tel: 0086-010-52176043; Fax: 0086-010-  
22 52176813.  
23  
24  
25

26  
27 E-mail address: [lcz623780@126.com](mailto:lcz623780@126.com)  
28

29 Word count: 4230  
30  
31  
32  
33  
34  
35  
36  
37  
38  
39  
40  
41  
42  
43  
44  
45  
46  
47  
48  
49  
50  
51  
52  
53  
54  
55  
56  
57  
58  
59  
60

## Abstract

**Objective**—To investigate the pattern of experimental pain responses at acupoints in patients with unilateral shoulder pain.

**Design**— A cross-sectional matched case-control study.

**Setting**—Acupuncture and Moxibustion Department, Beijing Hospital of Traditional Chinese Medicine Affiliated to Capital Medical University.

**Participants**—Volunteer sample of 60 participants (30 patients with unilateral shoulder pain, 30 healthy controls).

**Interventions**—Not applicable.

**Main Outcome Measures**—Pressure pain thresholds (PPTs) were measured at four acupoints, including Tianzong (SI 11), Jianliao (SJ 14), Jianyu (LI 15) and Jianzhen (SI 9) on the painful/non-painful side in patients with unilateral shoulder pain or healthy controls, respectively. The correlations between peripheral sensitization indexes (PSI) and central sensitization indexes (CSI) were compared in this study.

**Results**—The analysis revealed significantly lower PPT values at acupoints on the painful side compared with non-painful side in patients with shoulder pain ( $P < 0.025$ ). Meanwhile, PPTs on the non-painful side of these patients were lower than the ipsilateral side of healthy controls ( $P < 0.025$ ). No distinct differences of PPT values were found at non-acupoint among the painful/non-painful side in patients with shoulder pain and the ipsilateral side of healthy controls ( $P > 0.05$ ). Additionally, it was observed that the pressure pain assessment acupoints have strong association between the PSI and CSI, and three acupoints of SJ 14, LI 15 and SI 9 showed correlation in PSI or CSI particularly.

**Conclusion**—The results suggest the presence of peripheral and central sensitization at acupoints in participants with unilateral shoulder pain. There exists an obvious relationship among the three acupoints of SJ 14, LI 15 and SI 9, which are usually chosen to treat shoulder pain. The results provide the evidence for acupoints selection to treat shoulder pain by acupuncture.

1  
2  
3 **Keywords:** acupoints; peripheral sensitization; central sensitization; pressure pain threshold;  
4 shoulder pain  
5

### 6 7 **Strengths and limitations of this study** 8

9  
10 This is, to the best of our knowledge, the first study to support an alteration in both peripheral  
11 and central sensitization at acupoints in patients with shoulder pain.  
12

13  
14 The peripheral and central sensitization at acupoints seemed to occur correlatively  
15 independently from the relevant baseline variable.  
16

17  
18 A limitation of this study was that only a pressure pain assessment performed at acupoints,  
19 which might be inadequate to describe the complexity of pain perception.  
20

21  
22 This study was conducted in a single institution and consisted of a primarily female sample,  
23 so the external validity was not clear.  
24

## 25 26 **INTRODUCTION** 27

28  
29 Acupuncture is one of the most widely-used form of complementary and alternative  
30 medicines. There are about 183 countries using acupuncture treatment according to a survey  
31 conducted by the World Federation of Acupuncture and Moxibustion Societies in 2013 [1]. The  
32 WHO reports that acupuncture treatment can be beneficial for more than 40 disorders [2]. Pain is  
33 one of those disorders, which is particularly amenable to acupuncture. The evidence in reviews  
34 demonstrates that acupuncture treatment can reduce various types of clinical pain effectively in  
35 multiple clinical trials [3-5]. Recently, a meta-analysis reported that shoulder pain, low back pain,  
36 neck pain, osteoarthritis and chronic headache can be alleviated significantly after acupuncture  
37 treatment [6]. Shoulder pain is the third most common musculoskeletal disorder, of which the  
38 prevalence rate varies from 6.9% to 26% for point prevalence and even increases to 66.7% for  
39 lifetime prevalence in general population [7, 8]. In our previous study, we identified acupuncture  
40 treatment can alleviate shoulder pain, particularly in special acupoints (data unpublished).  
41  
42  
43  
44  
45  
46  
47  
48

49  
50 Acupoints are special sites at precise locations and lie on ‘meridians’ without a physical  
51 structure. According to the theory of meridians in traditional Chinese medicine, it is well known  
52 that the acupoints reflect disorders of visceral conditions. Many studies have observed visceral  
53 lesions result in changed pain perception of some special acupoints on the body surface [9]. Ben  
54  
55  
56  
57  
58  
59

1  
2  
3 et al assessed the phenomenon of experimental pain-sensitive points in patients with gastric ulcer  
4 or gastritis and found some special acupoints were more sensitive than other areas [10].  
5 Nevertheless, whether acupoints behave more sensitively under musculoskeletal pain has not  
6 been described in detail in previous studies.  
7  
8  
9

10 Sensitization is a nervous system phenomenon that can occur in conjunction with pain [11].  
11 When sensitization is present, there are two types of hypersensitivity including peripheral  
12 sensitization and central sensitization, which are important mechanisms for musculoskeletal pain  
13 conditions [12]. Peripheral sensitization is defined as the broadening of nociception in pain  
14 perception during activities or movements, which typically would be not painful [11]. Central  
15 sensitization refers to an amplification of neural signaling within the central nervous system that  
16 elicits pain hypersensitivity. It reflects increased activity of pain facilitation pathways and  
17 malfunctioning of descending pain inhibitory pathways [13-17].  
18  
19  
20  
21  
22  
23  
24

25 We performed a multicenter, single blind, factorial randomized controlled clinical trial  
26 previously (Number Register: ISRCTN61861069). In the study, we found the phenomenon that  
27 the pain threshold decreased at related acupoints in patients with unilateral shoulder pain was  
28 widespread. Therefore, we chose some patients from the trial to detect whether acupoints are  
29 hypersensitive in musculoskeletal pain disease. We hypothesized that the patients with unilateral  
30 shoulder pain would present peripheral or central sensitization at acupoints as evidenced by  
31 Pressure pain threshold (PPT) detection, when compared with healthy controls. Specifically,  
32 acupoints on the painful side would have lower PPT than on the non-painful side of patients.  
33 Also, acupoints on the non-painful side of patients would be hypersensitive as assessed by PPTs,  
34 with respect to the ipsilateral side of healthy controls. If the results confirm these hypotheses,  
35 then it provides evidence that acupoints exist for peripheral sensitization and central sensitization  
36 phenomenon in patients with unilateral shoulder pain.  
37  
38  
39  
40  
41  
42  
43  
44  
45

## 46 **METHODS AND ANALYSIS**

### 47 **Study design**

48  
49 This cross-sectional matched case-control study was conducted at the Department of  
50 Acupuncture and Moxibustion, Beijing Hospital of Traditional Chinese Medicine Affiliated to  
51 Capital Medical University.  
52  
53  
54  
55  
56  
57  
58  
59  
60

## Participants

Clinical patients—The 30 patients with shoulder pain were chosen from a multicenter, randomized trial. In total, 164 patients with shoulder pain were recruited from three centers in the random trial between January 2014 and September 2014. We enrolled the final 30 patients from 76 patients that screened in the center of Beijing Hospital of Traditional Chinese Medicine before any treatments were dispensed. The Research Ethical Committee of Beijing Hospital of Traditional Chinese Medicine Affiliated to Capital Medical University approved the trial (reference: 201315).

The inclusion criteria included presenting with unilateral shoulder pain for at least six weeks and up to two years, reporting the pain intensity  $> 50$  mm on a visual analogue scale (VAS), and being right hand dominant, who have not received acupuncture or other analgesic therapies in the preceding month.

The exclusion criteria were as follows: pain in both shoulders; referred pain from the cervical spine; previous history of shoulder surgery, pectorial muscle pain, thoracic outlet syndrome, stroke or ipsilateral breast surgery; heart diseases and severe hypertension; osteoarthritis of the glenohumeral joint or systemic bone and joint disorder (rheumatoid arthritis); endocrine diseases such as hyperthyroidism; severe infection; undergoing current therapy involving analgesics and especially major illness depression.

Healthy controls—The healthy controls were matched to the patients with shoulder pain individually. Each healthy control was matched for gender, age ( $\pm 1$  year), ethnicity and dominant hand to one patient. Healthy controls were recruited from the community via posted flyers and general advertisements between May 2014 and September 2014. Healthy controls were eligible if they were not currently performing resistance exercise for the upper extremity. They were excluded based on the following criteria: receiving acupuncture or other analgesic therapies in the preceding month, experiencing neck or shoulder pain, having a history of shoulder surgery or neurological impairments of the upper extremity, a shoulder skin infection, having difficulty in understanding instructions, and taking any pain medication currently.

## Protocol



1  
2  
3 All participants completed a packet of questionnaires including demographic data (age, sex,  
4 race, hand dominance) and psychological information before informed consent was obtained.  
5 The patients were initially examined by a researcher who assessed compliance using the  
6 inclusion and exclusion criteria. Beck Depression Inventory (BDI) is a multiple choice self-  
7 reported inventory for measuring the severity of depression [18]. If the BDI outcome is more  
8 than 4, the participants were excluded [19]. Clinical pain intensity was assessed by VAS, which  
9 consists a line of 0–100 mm: 0 representing ‘no pain at all’ and 100 mm representing ‘the most  
10 intense pain imaginable’.  
11  
12  
13  
14  
15  
16

17 After finishing the questionnaires, both shoulders of participants were exposed and the  
18 measurement sites were marked. An expert acupuncturist was responsible for the operation. Five  
19 points were marked in this study and shown in Figure 1 and Appendix Table 1. To assess the  
20 pain sensitivity of acupoints, four acupoints Jianliao (SJ 14), Jianyu (LI 15), Jianzhen (SI 9), and  
21 Tianzong (SI 11) were marked bilaterally with a marker pen drawing a circle (Figure 1. A. B).  
22 To assess the pain sensitivity in the non-acupoint, 2 cm down to Tianzong (SI 11) was marked  
23 bilaterally in participants (Figure 1. B).  
24  
25  
26  
27  
28  
29

### 30 **Measurement of pressure pain thresholds (PPT)**

31  
32 Both shoulders were exposed for examination by an operator. The participants were asked to  
33 take a prone position on the examination bed with a suitable pillow under the chest when  
34 Jianzhen (SI 9), Tianzong (SI 11) and non-acupoint were measured. Then the participants were  
35 required to sit on a chair with a researcher to keep the arm and shoulder in parallel when Jianliao  
36 (SJ 14) and Jianyu (LI 15) were measured.  
37  
38  
39  
40  
41

42 PPT is widely used to evaluate the pain sensory threshold for the patients with shoulder pain  
43 [20]. The lower value of PPT indicates the decreased nociceptive threshold of pain perception  
44 [21]. A handheld electronic pressure algometer (Wagner Instruments, Greenwich, CT) mounted  
45 with a 1 cm<sup>2</sup> rubber tipped plunger was used in this study. The probe was held perpendicular to  
46 marked points bilaterally, and the pressure was increased at a rate of 30kPa/s, in order to avoid  
47 potential skin penetration. All participants were instructed to indicate when the pressure became  
48 painful, at that time the pressure was immediately stopped and the digits were recorded. PPT was  
49 calculated as the mean of three trials on each point. There was an approximately 2 min interval  
50 between the repetitions. The operator was not to be told which side is the painful shoulder of  
51  
52  
53  
54  
55  
56  
57  
58  
59  
60

1  
2  
3 patients and blinded to patients and healthy controls. Additionally, the operator did not have any  
4 basic knowledge of acupoints and did not know whether the measuring sites were acupoints or  
5 not during testing.  
6  
7

### 8 9 **Data Analysis**

10  
11 The data were double entered with an adequate check in EpiData. SPSS 17.0 software (SPSS  
12 Inc., Chicago, IL, USA) was used for analysis. Discrete variables were summarized by  
13 frequencies and percentages. Distributed data were summarized using mean  $\pm$  standard deviation  
14 (SD) or median and interquartile range (IRQ). The distributed data were analyzed using a  
15 parametric statistical test (Pair t-test) if it agreed with normal distribution. Otherwise, the data  
16 were analyzed using a non-parametric (Wilcoxon's signed rank test) statistical test. Shapiro-Wilk  
17 test and observation of histograms and normal probability plots were used for all study variables  
18 to determine whether they followed a normal distribution. To adjust multiple comparisons, an  
19 alpha level of 0.025 was used for all pairwise comparisons.  
20  
21  
22  
23  
24  
25  
26

27  
28 Peripheral and central sensitization index was used to determine whether pain-sensitivity  
29 existed at the pressure pain assessment sites. We examined a patient's ratio response for PPT in  
30 painful side fell below the 25<sup>th</sup> percentile among the non-painful side which would indicate  
31 peripheral sensitization. The ratio responses were referred as the peripheral sensitization index  
32 (PSI) [22]. Central sensitization indicates a patient's response for PPT in non-painful side fell  
33 below the 25<sup>th</sup> percentile among the ipsilateral side of healthy controls. The ratio responses were  
34 termed the central sensitization index (CSI). The 25<sup>th</sup> percentile was suggested as a lower limit  
35 reference value for enhanced sensitivity [23]. Each index was examined by Pearson's correlation.  
36 We analyzed association between sensitization subgroups and the relevant baseline  
37 characteristics including demographic and clinical variables. Comparisons among the variables  
38 were examined using one way analysis of variance or Chi-square and assessment of 95%  
39 confidence intervals (CI). A *P* value <0.05 was defined as statistically significant.  
40  
41  
42  
43  
44  
45  
46  
47  
48

## 49 **RESULTS**

### 50 51 **Recruitment and baseline characteristics**

52  
53  
54 Between January 2014 and September 2014, thirty patients with shoulder pain (11 males and  
55 19 females) were enrolled in this study. The average age of the thirty patients was  $50.60 \pm 12.19$   
56  
57  
58  
59  
60

years (Table 1). The healthy controls included 11 males and 19 females with a mean age of 50.63 ± 12.20 years. All participants were right hand dominant.

**Table. 1** Characteristics of the patients with shoulder pain and healthy controls.

|                             | Patients With Shoulder Pain (N = 30) | Healthy Controls (N = 30) |
|-----------------------------|--------------------------------------|---------------------------|
| Age (years)                 | 50.60 ± 12.19                        | 50.63±12.20               |
| Sex (females), n (%)        | 19 (63.33)                           | 19 (63.33)                |
| Race (number of Han), n (%) | 30 (100)                             | 30 (100)                  |
| Pain duration (weeks)       | 19.07 ± 16.99                        | -                         |
| VAS (median, IQR)           | 70 (50 - 80)                         | -                         |
| BDI (median, IQR)           | 0 (0 - 0)                            | 0 (0 - 0)                 |
| BMI                         | 25.27 ± 4.17                         | 24.91 ± 3.77              |
| Normal ( ≤ 23.9)            | 11                                   | 12                        |
| Overweight (24 - 27.9)      | 12                                   | 14                        |
| Obese ( ≥ 28)               | 7                                    | 4                         |

Values represented as N, mean ± SD or median, IQR.

Abbreviations: N – Number, SD – standard deviation, VAS – Visual Analogue Scale, BDI– Beck Depression Inventory, BMI – Body Mass Index, IQR – interquartile range.

### PPT comparison of related acupoints

For the patients with shoulder pain, lower PPT levels were detected at acupoints on the painful side compared with the non-painful side (Table 2). The differences were 94.9 (95% CI, 53.47 to 136.33;  $p < 0.001$ ) at Tianzong (SI 11), 102.91 (95% CI, 79.85 to 125.97;  $p < 0.001$ ) at Jianliao (SJ 14), 91.19 (95% CI, 44.82 to 137.56;  $p < 0.001$ ) at Jianyu (LI 15), and 86.79 (95% CI, 56.30 to 117.28;  $p < 0.001$ ) at Jianzhen (SI 9), respectively.

The PPT value difference between the non-painful side of the patients and the ipsilateral side of healthy controls was also compared. PPTs at the acupoints on non-painful side of the patients were lower than on the ipsilateral side of healthy controls. The differences were 57.71 (95% CI, 24.72 to 90.70;  $p = 0.001$ ) at Tianzong (SI 11), 81.03 (95% CI, 41.40 to 120.67;  $p < 0.001$ ) at Jianliao (SJ 14), 72.20 (95% CI, 10.90 to 133.50;  $p = 0.02$ ) at Jianyu (LI 15), and 88.09 (95% CI, 39.88 to 136.30;  $p = 0.001$ ) at Jianzhen (SI 9), respectively.

**Table 2** Pressure pain threshold values for participants

|                  | Patients With Shoulder Pain |                  | Painful vs Non-painful Side |         | Health Controls  | Non-painful Side vs Ipsilateral Side |         |
|------------------|-----------------------------|------------------|-----------------------------|---------|------------------|--------------------------------------|---------|
|                  | Painful Side                | Non-painful Side | Mean (95% CI)               | P value | Ipsilateral Side | Mean (95% CI)                        | P value |
| Tianzong (SI 11) | 414.83 ± 135.61             | 509.73 ± 168.05  | 94.90 (53.47, 136.33)       | <0.001  | 567.44 ± 153.84  | 57.71 (24.72, 90.70)                 | 0.001   |
| Jianliao (SJ 14) | 469.70 ± 181.07             | 572.61 ± 196.71  | 102.91 (79.85, 125.97)      | <0.001  | 653.64 ± 211.50  | 81.03 (41.40, 120.67)                | <0.001  |
| Jianyu (LI 15)   | 434.79 ± 140.39             | 525.98 ± 160.16  | 91.19 (44.82, 137.56)       | <0.001  | 598.18 ± 181.76  | 72.20 (10.90, 133.50)                | 0.02    |
| Jianzhen (SI 9)  | 453.08 ± 154.54             | 539.87 ± 167.59  | 86.79 (56.30, 117.28)       | <0.001  | 627.96 ± 209.67  | 88.09 (39.88, 136.30)                | 0.001   |
| Non-acupoints    | 521.34 ± 147.02             | 538.67 ± 153.89  | 17.33 (-36.99, 2.34)        | 0.08    | 549.18 ± 143.66  | 10.51 (-18.87, 39.89)                | 0.47    |

Values represented as mean ± SD. The unit of values was Kpa. Abbreviations: SD – Standard Deviation, CI –Confidence Intervals.

### PPT comparison of non-acupoint

Figure 2 showed PPT at the non-acupoint. For the patients, the analysis revealed no obvious difference of 17.33 (95% CI, -36.99 to 2.34;  $p = 0.08$ ) in PPT value on the painful side compared to the non-painful side. Meanwhile, no significant difference of PPT level, which behaved 10.51 (95% CI, -18.87 to 39.89;  $p = 0.47$ ), was found between the non-painful side of the patients and the ipsilateral side of healthy controls.

### Peripheral Sensitization Index

All measured acupoints demonstrated side-to-side difference in the patients. They were used to compute a peripheral sensitization index (PSI). PPT values at acupoints on the painful side below the 25<sup>th</sup> percentile of the non-painful side indicated peripheral sensitization. The proportion of the patients with peripheral sensitization were 77% at Tianzong (SI 11), 37% at Jianliao (SJ 14), 43% at Jianyu (LI 15) and 60% at Jianzhen (SI 9) (Table 3). Significant correlation (Appendix Table 2) was observed in PSI among Jianliao (SJ 14), Jianyu (LI 15) and Jianzhen (SI 9) ( $p < 0.01$ ). There was no significant association between PSI and other baseline variables (Appendix Table 3).

**Table 3.** Frequencies meeting the peripheral sensitization index (PSI) and central sensitization index (CSI) based on PPT response.

| Sites            | PSI     | CSI     | PSI×CSI |
|------------------|---------|---------|---------|
| Tianzong (SI11)  | 23 (77) | 13 (43) | 13 (43) |
| Jianliao (SJ 14) | 11 (37) | 17 (57) | 9 (30)  |
| Jianyu (LI 15)   | 13 (43) | 19 (63) | 12 (40) |
| Jianzhen (SI 9)  | 18 (60) | 18 (60) | 15 (50) |

Values are individual counts (percentages). Abbreviations: PPT – Pressure-pain threshold.

### Central Sensitization Index

Four measured acupoints demonstrated difference between the painful side of patients and the ipsilateral side of healthy controls. Therefore, they were used to compute central sensitization index (CSI). The proportion of the patients were 43% at Tianzong (SI 11), 57% at Jianliao (SJ

1  
2  
3 14), 63% at Jianyu (LI 15) and 60% at Jianzhen (SI 9) (Table 3). Meanwhile, distinct significant  
4 association (Appendix Table 4) was observed among Jianliao (SJ 14), Jianyu (LI 15) and  
5 Jianzhen (SI 9) in CSI ( $p < 0.01$ ). Appendix Table 5 showed no statistical significance  
6 correlations between CSI and relevant baseline characteristics ( $p < 0.01$ ).  
7  
8  
9

### 10 **Comparison of Peripheral and Central Sensitization Index**

11  
12  
13 The frequencies of the patients who had both PSI and CSI were 43% at Tianzong (SI 11), 30%  
14 at Jianliao (SJ 14), 40% at Jianyu (LI 15) and 50% at Jianzhen (SI 9), respectively (Table 3).  
15 Significant correlation was observed between PSI and CSI in measured acupoints (Appendix  
16 Table 6). Table 4 showed that association between subgroups and sex approached statistical  
17 significance at the assessment acupoints ( $p < 0.001$ ). No significant association was observed  
18 between subgroups and other baseline variable ( $p > 0.05$ ).  
19  
20  
21  
22  
23  
24  
25  
26  
27  
28  
29  
30  
31  
32  
33  
34  
35  
36  
37  
38  
39  
40  
41  
42  
43  
44  
45  
46  
47  
48  
49  
50  
51  
52  
53  
54  
55  
56  
57  
58  
59  
60

**Table 4** Demographic, clinical, and psychological characteristics of sensitization groups.

|                         | Peripheral Sensitization | Central Sensitization | Peripheral and Central Sensitization | No Sensitization     | P value |
|-------------------------|--------------------------|-----------------------|--------------------------------------|----------------------|---------|
| <b>Tianzong (SI11)</b>  |                          |                       |                                      |                      |         |
| Age (years)             | 48.78 (43.45, 54.21)     | 50.38 (44.02, 56.75)  | 50.38 (44.02, 56.75)                 | 56.57 (48.00, 65.15) | 0.47    |
| Sex (%females)          | 78.28 (56.14, 92.52)     | 76.92 (46.16, 94.89)  | 76.92 (46.16, 94.89)                 | 14.29 (3.68, 57.62)  | <0.001  |
| Pain duration (weeks)   | 21.04 (12.91, 29.17)     | 24.31 (10.23, 38.38)  | 24.31 (10.23, 38.38)                 | 12.57 (7.16, 17.99)  | 0.60    |
| VAS                     | 68.04 (61.25, 74.84)     | 71.15 (62.77, 79.53)  | 71.15 (62.77, 79.53)                 | 60.00 (52.45, 67.55) | 0.34    |
| <b>Jianliao (SJ 14)</b> |                          |                       |                                      |                      |         |
| Age (years)             | 48.09 (38.47, 57.71)     | 49.59 (43.35, 55.82)  | 48.89 (38.97, 58.81)                 | 53.27 (46.22, 60.33) | 0.78    |
| Sex (%females)          | 100                      | 82.35 (56.42, 96.62)  | 100                                  | 27.27 (6.01, 60.95)  | <0.001  |
| Pain duration (weeks)   | 22.55 (10.81, 34.28)     | 23.29 (12.80, 33.79)  | 22.22 (7.96, 36.49)                  | 11.64 (7.07, 16.21)  | 0.32    |
| VAS                     | 70.00 (59.17, 80.83)     | 68.82 (61.14, 76.51)  | 72.22 (59.60, 84.84)                 | 63.18 (53.41, 72.95) | 0.59    |
| <b>Jianyu (LI 15)</b>   |                          |                       |                                      |                      |         |
| Age (years)             | 46.92 (38.29, 55.56)     | 47.47 (41.20, 53.75)  | 45.42 (36.64, 54.19)                 | 55.10 (48.95, 61.25) | 0.32    |
| Sex (%females)          | 92.31 (63.76, 99.81)     | 89.47 (66.90, 98.70)  | 100                                  | 20.00 (2.54, 55.41)  | <0.001  |
| Pain duration (weeks)   | 19.69 (9.51, 29.87)      | 21.89 (12.14, 31.65)  | 20.67 (9.73, 31.60)                  | 14.80 (9.23, 20.37)  | 0.76    |
| VAS                     | 68.46 (59.62, 77.30)     | 66.84 (59.65, 74.04)  | 66.67 (57.96, 75.38)                 | 62.50 (53.38, 71.62) | 0.79    |
| <b>Jianzhen (SI 9)</b>  |                          |                       |                                      |                      |         |
| Age (years)             | 48.22 (41.53, 54.91)     | 48.00 (41.35, 54.65)  | 46.27 (38.65, 53.88)                 | 53.33 (45.49, 61.17) | 0.64    |
| Sex (%females)          | 83.33 (58.57, 96.44)     | 83.33 (58.57, 96.44)  | 93.33 (67.97, 99.83)                 | 33.33 (7.45, 70.06)  | <0.001  |
| Pain duration (weeks)   | 17.11 (9.58, 24.64)      | 18.22 (10.77, 25.67)  | 18.67 (9.70, 27.63)                  | 24.00 (6.74, 41.26)  | 0.78    |
| VAS                     | 67.78 (60.43, 75.13)     | 66.67 (58.85, 74.48)  | 68.00 (59.32, 76.68)                 | 65.00 (53.79, 76.21) | 0.97    |

Values presented as % (for sex) or mean with [95% CI]. Abbreviations: VAS – Visual Analogue Acale.

## DISCUSSION

The current results were in agreement with a peripherally sensitized state at acupoints which is determined by the side-to-side difference of PPT values in patients with unilateral shoulder pain. Central sensitization at acupoints was conducted by comparing pressure sensitivity in patients with healthy age- and sex-matched healthy controls. No obvious PPT values difference was found at the non-acupoint among the painful side, non-painful side and ipsilateral side. To advance this line of research, association between peripheral and central sensitization at acupoints was examined. We found that the patients displayed a significant association between peripheral and central sensitization at measured acupoints. This finding demonstrated that there existed two patterns of sensitization in acupoints. In addition, three acupoints Jianliao (SJ 14), Jianyu (LI 15) and Jianzhen (SI 9) that are normally used for treating shoulder pain had correlation.

Previous investigations had reported that splanchnic diseases can induce mechanical hyperalgesia on the corresponding acupoints when pressed [24]. Acupoints turned to the “activated mode” or “sensitized mode” from the “silent mode” in pathological conditions. This phenomenon is called “acupoint sensitization”. At some acupoints there appeared to be a hypersensitivity of temperature (heat-sensitization) or pain threshold (pain-sensitization) under visceral pain [9, 25]. But unlike those studies, we examined acupoints in patients with musculoskeletal pain in this study.

Central sensitization is challenging clinically, since no standard assessment exists. Some studies recommended the use of various modalities for pain sensitivity at local and distal locations [21, 26]. However, other researches showed that decreased PPTs at the painful and non-painful shoulder, but not at the muscle tibialis anterior [27-29]. According to “Criteria for the Classification of Central Sensitization Pain”, patients with diffuse pain distribution, allodynia, and hyperalgesia are more likely to present with central sensitization. One of the patterns of pain distribution is that patients have bilateral pain/mirror pain [17]. In the patients with shoulder pain, the increased sensitivity to mechanical input in the contralateral shoulder would be interpreted as central sensitization [11]. A large number of studies define central sensitization as pain sensitivity at local and distal locations. We chose bilateral pain to define central sensitization,



1  
2  
3 unlike earlier studies, and to determine whether there existed patterns of experimental pain  
4 responses at shoulder acupoints.  
5  
6

7 Collectively, the findings of the study support the alteration in both peripheral and central  
8 sensitization at acupoints in patients with musculoskeletal pain. We determined whether  
9 peripheral and central sensitization were more likely to occur together or alone, and found  
10 peripheral sensitization was not a prerequisite for the presence of central sensitization at  
11 acupoints. The results demonstrated that PSI and CSI presented in association at all the pressure  
12 pain assessment acupoints. In PSI or CSI, the strong association was found at three acupoints of  
13 Jianliao (SJ 14), Jianyu (LI 15) and Jianzhen (SI 9). No distinct association was found between  
14 Tianzong (SI 11) and other acupoints by comparing PSI or CSI. From the clinical perspective,  
15 Jianliao (SJ 14), Jianyu (LI 15) and Jianzhen (SI 9) are frequently chosen to treat shoulder pain  
16 in clinical practice, and have been called “shoulder three acupoints” by acupuncturists [30, 31].  
17 Jianyu (LI 15), Jianliao (SJ 14) and Jianzhen (SI 9), are highly-refined acupoints used to treat  
18 shoulder pain in the clinic, and have been proven to be effective at regulating muscle strength  
19 and tension of shoulder joint [32]. The strong association among Jianliao (SJ 14), Jianyu (LI 15)  
20 and Jianzhen (SI 9) is consistent with the conception of traditional Chinese medicine.  
21  
22  
23  
24  
25  
26  
27  
28  
29  
30  
31

32 To our knowledge, this is the first study to research peripheral and central sensitization at  
33 acupoints in patients with shoulder pain. One of the advantages of the study is that the measured  
34 acupoints and non-acupoint were marked by an acupuncturist with 24 years of experience in  
35 clinical acupuncture treatment. The evaluator who measured PPTs also has extensive experience  
36 with using the algometer and without basic knowledge of acupoints. The internal validity is  
37 increased by blinding the evaluator who did not know whether the measured sites were acupoints  
38 or not during testing. In addition, the evaluator was blinded as to whether the test participant was  
39 a patient or a healthy control. The participants were asked to take different positions when  
40 different acupoints were measured. For example, the participants were required take a prone  
41 position on the examination bed with a suitable pillow under the chest and the arms close to the  
42 body when Jianzhen (SI 9) was measured. It increases the reliability of testing PPT over a soft  
43 area.  
44  
45  
46  
47  
48  
49  
50  
51  
52

53 Specifically, the result indicates that peripheral and central sensitization at acupoints is not  
54 relevant to pain duration. Moreover, there is no obvious evidence that the pattern of sensitization  
55  
56  
57  
58  
59  
60

1  
2  
3 has relation with the degree of severity of the clinical condition as measured by VAS. These  
4 changes are consistent with the idea of traditional Chinese medicine that acupoints are the crucial  
5 reflex points of body lesions under pathological circumstance. Hyperalgesia and skin  
6 sensitization can occur at corresponding acupoints in the presence of some diseases [33].  
7 Morphological structure studies have reported that the nervous system and blood vessels might  
8 have a close relationship with acupoints [34-36]. For example, abundant microvessels existed at  
9 the acupoints of Zhongji (RN3) and Zusanli (ST36) in contrast to the surrounding tissues [37].  
10 The acupoints also have a high density of nerve endings including A- and C- afferent fibers [38,  
11 39]. Those characteristics of higher concentration of neural, vascular elements and mast cells  
12 could make pain perception more sensitive, and might contribute to peripheral sensitivity. To  
13 confirm the specificity of acupoints, we selected a non-acupoint in the infraspinatus muscle.  
14 Obviously, no significant difference was found in PPT values among the painful/ non-painful  
15 side of patients and the ipsilateral side of healthy controls. The finding proved that acupoints  
16 become a specific reflex point that respond to the presence of musculoskeletal pain. Our study  
17 provides evidence that there is an association with acupoints sensitization and gender. Pain  
18 difference in gender has become an increased topic in recent years, and lower PPT values in  
19 women than that in men were found either in healthy subjects or in clinical patients [40]. But, the  
20 significant difference may be accounted for by the fact that the majority of the patients were  
21 female (63.33%) in the study.

22  
23  
24  
25  
26  
27  
28  
29  
30  
31  
32  
33  
34  
35  
36  
37 There are limitations that should be kept in mind regarding this study. Pain perception is  
38 multidimensional. PPT measurements are just a mechanical and standardized stimulation and are  
39 inadequate to describe the complexity of pain perception. The multimodal approach should be  
40 used to provide the details of the pain system in both normal and pathophysiological situations,  
41 such as different stimulus modalities and quantitative assessment of various pain mechanisms.  
42 Second, the non-acupoint was chosen as 2 cm down from Tianzong (SI 11) because the shoulder  
43 blade is relatively flat and may reduce the measurement errors between acupoints and non-  
44 acupoints. In the clinical trial published recently, the distance was 1 cun (2-3 cm) between the  
45 non-acupoints and acupoints, and clinical outcome showed that acupoints treatment alleviated  
46 symptoms superior to non-acupoints treatment [41]. The measured sites are adjacent in some  
47 studies including PPT measured [42, 43]. The distance is 2 cm between the non-acupoint and  
48 Tianzong (SI 11), which is acceptable in our study. For reducing the stimulation effect, there is

1  
2  
3 an approximately 2 min interval between the repetitions. The probability of a possible  
4 stimulation by too close to acupoint is low but it could not be ruled out completely. In addition,  
5 Ashi points also named reflexing points or tender spots. They are the phenomenon acupoints or  
6 temporary acupoints, which are dissimilar from acupoints of the fourteen meridians or  
7 extraordinary points. Generally, Ashi points have no specific names and definite locations, and  
8 will vanish after disease recovered. The aim of our study is to investigate the pattern of  
9 experimental pain responses at acupoints, which have specific names and definite locations. For  
10 that reason, the Ashi points do not take into account in this study. Further studies need to be  
11 conducted to confirm the phenomena observed here.  
12  
13  
14  
15  
16  
17  
18

## 19 CONCLUSIONS

20  
21  
22 In conclusion, there exists a mixed presence of sensitization patterns at acupoints in patients  
23 with unilateral shoulder pain and a strong correlation among Jianliao (SJ 14), Jianyu (LI 15) and  
24 Jianzhen (SI 9). Future research utilizing the multimodal pain approach should be conducted,  
25 such as suprathreshold heat pain response, to determine various sensitivity mechanisms.  
26  
27  
28  
29  
30  
31  
32  
33

## 34 Legends

35  
36 **Figure 1.** The pressure pain assessment sites in the present study. (A) Locations for the pressure  
37 pain threshold (PPT) measurement at Jianliao (SJ 14), Jianyu (LI 15) and Jianzhen (SI 9). (B)  
38 Locations for the PPT measurement at Tianzong (SI 11) and Non-acupoint.  
39  
40  
41  
42  
43

44 **Figure 2.** The values of pressure pain threshold (PPT) at the non-acupoint. Values are mean  $\pm$   
45 SD.  
46  
47  
48  
49

## 50 Footnotes

51  
52 **Contributors** Conceived and designed the experiments: Qian-Qian Li, Cun-Zhi Liu. Performed  
53 the experiments: Guang-Xia Shi, Qing-Nan Fu, Chao-Qun Yan, Shuai Zhang. Analyzed the data:  
54  
55  
56  
57  
58  
59  
60

1  
2  
3 Li-Wen Zhang, Xue-Rui Wang. Wrote the paper: Chao-Qun Yan, Qian-Qian Li. All authors  
4 approved the final manuscript.  
5  
6

7 **Funding** This work was supported by Beijing Municipal Administration of Hospitals Clinical  
8 Medicine Development of Special Funding Support grant number XMLX201607 and  
9 ZYLY201412.  
10  
11

12  
13 **Competing interests** We have read and understood BMJ policy on declaration of interests and  
14 declare that we have no competing interests.  
15  
16

17 **Ethics approval** The Research Ethical Committee of Beijing Hospital of Traditional Chinese  
18 Medicine Affiliated to Capital Medical University approved the trial.  
19  
20

21 **Patient consent** Obtained.  
22

23  
24 **Provenance and peer review** Not commissioned; externally peer reviewed.  
25

26 **Data Sharing Statement** No additional data are available.  
27

## 28 **References**

- 29  
30  
31 1. WHO Traditional Medicine Strategy: 2014–2023. ISBN: 978 92 4 150609 0 (2013);  
32 Available at [http://www.who.int/edicines/publications/traditional/trm\\_strategy14\\_23/en/](http://www.who.int/edicines/publications/traditional/trm_strategy14_23/en/)  
33  
34  
35 2. <http://apps.who.int/medicinedocs/pdf/s4926e/s4926e.pdf>  
36  
37 3. De Kooning M, Tobbackx Y, Meeus M et al. Acupuncture-Analgesia Following a Single  
38 Treatment Session in Chronic Whiplash is Unrelated to Autonomic Nervous System  
39 Changes: A Randomized Cross-over Trial. *Pain physician* 2015;18(6):527-536.  
40  
41  
42 4. MacPherson H, Tilbrook H, Richmond S et al. Alexander Technique Lessons or  
43 Acupuncture Sessions for Persons With Chronic Neck Pain: A Randomized Trial. *Annals*  
44 *of internal medicine* 2015;163(9):653-662.5.  
45  
46  
47 5. Fister DG, Cassileth BR, Deng GE et al. Acupuncture for pain and dysfunction after neck  
48 dissection: results of a randomized controlled trial. *Journal of clinical oncology*  
49  
50  
51  
52  
53  
54  
55  
56  
57  
58  
59  
60

- 2010;28(15):2565-2570.
6. Vickers AJ, Cronin AM, Maschino AC et al. Acupuncture for chronic pain: individual patient data meta-analysis. *Archives of internal medicine* 2012;172(19):1444-1453.
  7. Luime JJ, Koes BW, Hendriksen IJ et al. Prevalence and incidence of shoulder pain in the general population; a systematic review. *Scand. J. Rheumatol.* 2004;33(2):73-81.
  8. Luime JJ, Koes BW, Miedem HS et al. High incidence and recurrence of shoulder and neck pain in nursing home employees was demonstrated during a 2-year follow-up. *J. Clin. Epidemiol.* 2005;58(4):407-413.
  9. Rong PJ, Li S, Ben H et al. Peripheral and spinal mechanisms of acupoint sensitization phenomenon. *Evidence-based complementary and alternative medicine* 2013;2013:742195.
  10. Ben H, Li L, Rong PJ et al. Observation of Pain-Sensitive Points along the Meridians in Patients with Gastric Ulcer or Gastritis. *Evidence-based complementary and alternative medicine* 2012;2012:130802.
  11. Borstad J, Woeste C. The role of sensitization in musculoskeletal shoulder pain. *Brazilian journal of physical therapy* 2015;19(4):251-257.
  12. Arendt-Nielsen L, Fernández-de-Las-Peñas C, Graven-Nielsen T. Basic aspects of musculoskeletal pain: from acute to chronic pain. *The Journal of manual & manipulative therapy* 2011;19(4):186-93.
  13. Woolf CJ. Central sensitization: implications for the diagnosis and treatment of pain. *Pain* 2011;152(3 Suppl): S2–15.
  14. Nijs J, Van Houdenhove B, Oostendorp RA. Recognition of central sensitization in patients with musculoskeletal pain: Application of pain neurophysiology in manual

- 1  
2  
3 therapy practice. *Manipulation Association of Chartered Physiotherapists* 2010;15:135-  
4  
5 141.  
6  
7  
8 15. Staud R, Craggs JG, Robinson ME, et al. Brain activity related to temporal summation of  
9  
10 C-fiber evoked pain. *Pain* 2007;129:130-142.  
11  
12  
13 16. Meeus M, Nijs J. Central sensitization: A biopsychosocial explanation for chronic  
14  
15 widespread pain in patients with fibromyalgia and chronic fatigue syndrome. *Clinical*  
16  
17 *rheumatology* 2007; 26:465-473.  
18  
19  
20 17. Nijs J, Torres-Cueco R, van Wilgen CP, et al. Applying modern pain neuroscience in  
21  
22 clinical practice: criteria for the classification of central sensitization pain. *Pain Physician*  
23  
24 2014;17(5):447-57.  
25  
26  
27 18. Smarr KL, Keefer AL. Measures of depression and depressive symptoms: Beck  
28  
29 Depression Inventory-II (BDI-II), Center for Epidemiologic Studies Depression Scale  
30  
31 (CES-D), Geriatric Depression Scale (GDS), Hospital Anxiety and Depression Scale  
32  
33 (HADS), an Patient Health Questionnaire-9 (PHQ-9). *Arthritis care & research* 2011;63  
34  
35 Suppl 11:S454-466.  
36  
37 19. Zheng HB, Zheng YP. [The application of Beck Depression Inventory in depression  
38  
39 patients]. *Chinese Journal of Nervous and Mental Diseases*. 1987;13(4):236  
40  
41 20. Ge HY, Fernandez-de-Las-Penas C, Madeleine P, Arendt-Nielsen L. Topographical  
42  
43 mapping and mechanical pain sensitivity of myofascial trigger points in the infraspinatus  
44  
45 muscle. *European journal of pain* 2008;12(7):859-865.  
46  
47  
48 21. Paul TM, Soo Hoo J, Chae J, Wilson RD. Central hypersensitivity in patients with  
49  
50 subacromial impingement syndrome. *Arch. Phys. Med. Rehabil.* 2012;93(12):2206-2209.  
51  
52  
53 22. Coronado RA, Simon CB, Valencia C, George SZ. Experimental pain responses support  
54  
55 peripheral and central sensitization in patients with unilateral shoulder pain. *The Clinical*  
56  
57  
58  
59  
60

- 1  
2  
3 *journal of pain* 2014;30(2):143-151.  
4  
5  
6 23. Neziri AY, Scaramozzino P, Andersen OK, et al. Reference values of mechanical and  
7 thermal pain tests in a pain-free population. *European journal of pain*. 2011;15(4):376-83.  
8  
9  
10 24. Chae Y, Kim HY, Lee HJ et al. The alteration of pain sensitivity at disease-specific  
11 acupuncture points in premenstrual syndrome. *The journal of physiological sciences*  
12  
13 2007;57(2):115-119.  
14  
15  
16 25. Peles S, Miranda A, Shaker R, Sengupta JN. Acute nociceptive somatic stimulus  
17 sensitizes neurones in the spinal cord to colonic distension in the rat. *The Journal of*  
18  
19 *physiology* 2004;560(Pt 1):291-302.  
20  
21  
22  
23 26. Nijs J, Van Houdenhove B, Oostendorp RA. Recognition of central sensitization in  
24 patients with musculoskeletal pain: Application of pain neurophysiology in manual  
25  
26 therapy practice. *Manipulation Association of Chartered Physiotherapists*. 2010;15:135-  
27  
28 141.  
29  
30  
31  
32 27. Ge HY, Fernández-de-las-Peñas C, Arendt-Nielsen L. Sympathetic facilitation of  
33 hyperalgesia evoked from myofascial tender and trigger points in patients with unilateral  
34  
35 shoulder pain. *Clinical neurophysiology*. 2006;117:1545–1550.  
36  
37  
38  
39 28. Albuquerque-Sendín F, Camargo PR, Vieira A, et al. Bilateral myofascial trigger points  
40 and pressure pain thresholds in the shoulder muscles in patients. *The Clinical journal of*  
41  
42 *pain*. 2013;29(6):478-86.  
43  
44  
45  
46 29. Gwilym SE, Oag HC, Tracey I, et al. Evidence that central sensitisation is present in  
47 patients with shoulder impingement syndrome and influences the outcome after surgery.  
48  
49 The Journal of bone and joint surgery. *British volume*. 2011;93(4):498-502.  
50  
51  
52  
53 30. Chen L. [A new thinking of acupuncture and moxibustion treatment of shoulder pain  
54  
55  
56  
57  
58  
59  
60

- 1  
2  
3 After hemiplegia]. *Zhongguo zhen jiu = Chinese acupuncture & moxibustion*  
4  
5 2006;26(9):669-671.  
6  
7  
8 31. Li N, Tian FW, Wang CW et al. [Double-center randomized controlled trial on post-  
9  
10 stroke shoulder pain treated by electroacupuncture combined with Tuina]. *Zhongguo zhen*  
11  
12 *jiu = Chinese acupuncture & moxibustion* 2012;32(2):101-105.  
13  
14  
15 32. Chen MY, Pu QQ, Liu SY, Jiang ZY. [Efficacy comparison of different stimulation  
16  
17 therapies for peri-arthritis of shoulder]. *Zhongguo zhen jiu = Chinese acupuncture &*  
18  
19 *moxibustion* 2013;33(2):109-112.  
20  
21  
22 33. Li L, Yu L, Rong P et al. Visceral nociceptive afferent facilitates reaction of subnucleus  
23  
24 reticularis dorsalis to acupoint stimulation in rats. *Evidence-based complementary and*  
25  
26 *alternative medicine* 2013;2013:931283.  
27  
28  
29 34. Kuo TC, Lin CW, Ho FM. The soreness and numbness effect of acupuncture on skin  
30  
31 blood flow. *The American journal of Chinese medicine* 2004;32(1):117-129.  
32  
33  
34 35. Zhang D, Yan X, Zhang X et al. Synchrotron radiation phase-contrast X-ray CT imaging  
35  
36 of acupuncture points. *Analytical and bioanalytical chemistry* 2011;401(3):803-808.  
37  
38  
39 36. Wick F, Wick N, Wick MC. Morphological analysis of human acupuncture points  
40  
41 through immunohistochemistry. *American journal of physical medicine & rehabilitation /*  
42  
43 *Association of Academic Physiatrists* 2007;86(1):7-11.  
44  
45  
46 37. Oh DS, Kang W, Choi SM, Son CG. Effect of acupuncture for gastrointestinal activity  
47  
48 differs depending on the pathophysiological condition. *Acupuncture in medicine : journal*  
49  
50 *of the British Medical Acupuncture Society* 2011;29(4):316-317.  
51  
52  
53 38. Li AH, Zhang JM, Xie YK. Human acupuncture points mapped in rats are associated  
54  
55 with excitable muscle/skin-nerve complexes with enriched nerve endings. *Brain research*  
56  
57  
58  
59



- 1  
2  
3 2004;1012(1-2):154-159.  
4  
5  
6 39. Zhu B, Xu WD, Rong PJ et al. A C-fiber reflex inhibition induced by electroacupuncture  
7  
8 with different intensities applied at homotopic and heterotopic acupoints in rats  
9  
10 selectively destructive effects on myelinated and unmyelinated afferent fibers. *Brain*  
11  
12 *research* 2004;1011(2):228-237.  
13  
14 40. Tschugg A, Loscher WN, Hartmann S et al. Gender Influences Radicular Pain Perception  
15  
16 in Patients with Lumbar Disc Herniation. *J Womens Health* 2015;24(9):771-776.  
17  
18 41. Liu Z, Yan S, Wu J, et al. Acupuncture for Chronic Severe Functional Constipation: A  
19  
20 Randomized Trial. *Annals of Internal Medicine*. 2016;12(6);165(11):761-769.  
21  
22  
23 42. Hong-You Ge a, Ce ´sar Ferna ´ndez-de-las-Pen ˜as b, Pascal Madeleine, et al.  
24  
25  
26 Topographical mapping and mechanical pain sensitivity of myofascial trigger points in  
27  
28 the infraspinatus muscle. *European Journal of Pain*. 2008;12: 859–865.  
29  
30 43. Binderup AT, Arendt-Nielsen L, Madeleine P. Pressure pain threshold mapping of the  
31  
32 trapezius muscle reveals heterogeneity in the distribution of muscular hyperalgesia after  
33  
34 eccentric exercise. *European Journal of Pain*. 2010;14(7):705-12.  
35  
36  
37  
38  
39  
40  
41  
42  
43  
44  
45  
46  
47  
48  
49  
50  
51  
52  
53  
54  
55  
56  
57  
58  
59  
60

1  
2  
3  
4  
5  
6  
7  
8  
9  
10  
11  
12  
13  
14  
15  
16  
17  
18  
19  
20  
21  
22  
23  
24  
25  
26  
27  
28  
29  
30  
31  
32  
33  
34  
35  
36  
37  
38  
39  
40  
41  
42  
43  
44  
45  
46  
47  
48  
49  
50  
51  
52  
53  
54  
55  
56  
57  
58  
59  
60



233x101mm (300 x 300 DPI)

Peer review only



96x88mm (300 x 300 DPI)

BMJ

**Appendix Table 1.** Locations for the pressure pain assessment sites in the present study.

| Points           | Location                                                                                                                                                                                                                                                                 |
|------------------|--------------------------------------------------------------------------------------------------------------------------------------------------------------------------------------------------------------------------------------------------------------------------|
| Jianliao (SJ 14) | In the depression posterior and inferior to the acromion when arm is abducted.                                                                                                                                                                                           |
| Jianyu (LI 15)   | In the depression between the acromial extremity of the clavicle and the great tuberosity of humerus; or when the arm is in full abduction, the acupoint is in the depression at the anterior border of the acromioclavicular joint, and superior to the shoulder joint. |
| Jianzhen (SI 9)  | 1 cun directly above the posterior end of the axillary fold when the arm is abducted.                                                                                                                                                                                    |
| Tianzong (SI 11) | In the depression in the center of the subscapular fossa, at the point 1/3 of the line between the lower border of the mesoscapula and lower angle of capula.                                                                                                            |
| Non-acupoint     | 2 cm down to Tianzong (SI 11).                                                                                                                                                                                                                                           |

**Appendix Table 2.** Correlation of peripheral sensitization index (PSI) among acupoints.

|                        | PSI             |                  |                |                 |
|------------------------|-----------------|------------------|----------------|-----------------|
|                        | Tianzong (SI11) | Jianliao (SJ 14) | Jianyu (LI 15) | Jianzhen (SI 9) |
| PSI<br>Tianzong (SI11) | 1.00            | 0.26             | 0.32           | 0.35            |
| Jianliao (SJ 14)       | 0.26            | 1.00             | 0.73*          | 0.62*           |
| Jianyu (LI 15)         | 0.32            | 0.73*            | 1.00           | 0.25            |
| Jianzhen (SI 9)        | 0.35            | 0.62*            | 0.44*          | 1.00            |

Values are Pearson's correlation. \*Significant association between variables ( $p < .01$ ).

**Appendix Table 3.** Correlation between peripheral sensitization indexes (PSI) and relevant baseline characteristics.

|                       | PSI              |                  |                |                 |
|-----------------------|------------------|------------------|----------------|-----------------|
|                       | Tianzong (SI 11) | Jianliao (SJ 14) | Jianyu (LI 15) | Jianzhen (SI 9) |
| Age (years)           | -0.28            | -0.13            | -0.21          | -0.22           |
| Pain duration (weeks) | 0.21             | 0.20             | -0.10          | -0.20           |
| VAS                   | 0.24             | 0.16             | 0.27           | -0.12           |

Values are Pearson's correlation.

**Appendix Table 4.** Correlation of central sensitization index (CSI) among acupoints.

|                  | CSI             |                  |                |                 |
|------------------|-----------------|------------------|----------------|-----------------|
|                  | Tianzong (SI11) | Jianliao (SJ 14) | Jianyu (LI 15) | Jianzhen (SI 9) |
| Tianzong (SI11)  | 1.00            | 0.86             | 0.11           | 0.17            |
| Jianliao (SJ 14) | 0.09            | 1.00             | 0.59*          | 0.25            |
| Jianyu (LI 15)   | 0.11            | 0.59*            | 1.00           | 0.51*           |
| Jianzhen (SI 9)  | 0.17            | 0.25             | 0.51*          | 1.00            |

Values are Pearson's correlation. \*Significant association between variables ( $p < 0.01$ ).

**Appendix Table 5.** Correlation between central sensitization index (CSI) and relevant baseline characteristics.

|                       | CSI              |                  |                |                 |
|-----------------------|------------------|------------------|----------------|-----------------|
|                       | Tianzong (SI 11) | Jianliao (SJ 14) | Jianyu (LI 15) | Jianzhen (SI 9) |
| Age (years)           | -0.10            | -0.12            | -0.32          | -0.24           |
| Pain duration (weeks) | 0.13             | 0.29             | -0.16          | -0.05           |
| VAS                   | 0.33             | 0.21             | 0.04           | 0.01            |

Values are Pearson's correlation.

**Appendix Table 6.** Correlation between peripheral sensitization index (PSI) and central sensitization index (CSI).

|                               | CSI             |                  |                |                 |
|-------------------------------|-----------------|------------------|----------------|-----------------|
|                               | Tianzong (SI11) | Jianliao (SJ 14) | Jianyu (LI 15) | Jianzhen (SI 9) |
| <b>PSI</b><br>Tianzong (SI11) | 0.48*           | 0.15             | 0.40*          | 0.52*           |
| Jianliao (SJ 14)              | 0.17            | 0.39*            | 0.58*          | 0.62*           |
| Jianyu (LI 15)                | 0.32            | 0.36             | 0.53*          | 0.58*           |
| Jianzhen (SI 9)               | 0.17            | 0.25             | 0.65*          | 0.58*           |

Values are Pearson's correlation. \*Significant association between variables ( $p < 0.01$ ).

# BMJ Open

## Detection for peripheral and central sensitization at acupoints in patients with unilateral shoulder pain: a cross-sectional matched case-control study

|                                 |                                                                                                                                                                                                                                                                                                                                                                                                                                                                                                                                                                                                                                                                                                                                                                                                                                                                                                                                                                                                                    |
|---------------------------------|--------------------------------------------------------------------------------------------------------------------------------------------------------------------------------------------------------------------------------------------------------------------------------------------------------------------------------------------------------------------------------------------------------------------------------------------------------------------------------------------------------------------------------------------------------------------------------------------------------------------------------------------------------------------------------------------------------------------------------------------------------------------------------------------------------------------------------------------------------------------------------------------------------------------------------------------------------------------------------------------------------------------|
| Journal:                        | <i>BMJ Open</i>                                                                                                                                                                                                                                                                                                                                                                                                                                                                                                                                                                                                                                                                                                                                                                                                                                                                                                                                                                                                    |
| Manuscript ID                   | bmjopen-2016-014438.R2                                                                                                                                                                                                                                                                                                                                                                                                                                                                                                                                                                                                                                                                                                                                                                                                                                                                                                                                                                                             |
| Article Type:                   | Research                                                                                                                                                                                                                                                                                                                                                                                                                                                                                                                                                                                                                                                                                                                                                                                                                                                                                                                                                                                                           |
| Date Submitted by the Author:   | 10-Mar-2017                                                                                                                                                                                                                                                                                                                                                                                                                                                                                                                                                                                                                                                                                                                                                                                                                                                                                                                                                                                                        |
| Complete List of Authors:       | Yan, Chao-qun; Beijing Hospital of Traditional Chinese Medicine affiliated to Capital Medical University, Acupuncture and Moxibustion Department beijing, CN<br>Zhang, Shuai; Beijing Hospital of Traditional Chinese Medicine affiliated to Capital Medical University, Acupuncture and Moxibustion Department<br>Li, Qian-Qian; Beijing Hospital of Traditional Chinese Medicine affiliated to Capital Medical University,<br>Zhang, Liwen; Shandong University of Traditional Chinese Medicine<br>Wang, Xue-Rui; Beijing Hospital of Traditional Chinese Medicine affiliated to Capital Medical University, Acupuncture and Moxibustion Department<br>Fu, Qing-Nan; Beijing Hospital of Traditional Chinese Medicine affiliated to Capital Medical University,<br>Shi, Guangxia; Beijing Hospital of Traditional Chinese Medicine affiliated to Capital Medical University, Acupuncture and Moxibustion Department<br>LIU, Cunzhi; Beijing Hospital of Traditional Chinese Medicine , Department of acupuncture |
| <b>Primary Subject Heading</b>: | Complementary medicine                                                                                                                                                                                                                                                                                                                                                                                                                                                                                                                                                                                                                                                                                                                                                                                                                                                                                                                                                                                             |
| Secondary Subject Heading:      | Rehabilitation medicine                                                                                                                                                                                                                                                                                                                                                                                                                                                                                                                                                                                                                                                                                                                                                                                                                                                                                                                                                                                            |
| Keywords:                       | Pain management < ANAESTHETICS, Rehabilitation medicine < INTERNAL MEDICINE, COMPLEMENTARY MEDICINE                                                                                                                                                                                                                                                                                                                                                                                                                                                                                                                                                                                                                                                                                                                                                                                                                                                                                                                |
|                                 |                                                                                                                                                                                                                                                                                                                                                                                                                                                                                                                                                                                                                                                                                                                                                                                                                                                                                                                                                                                                                    |

SCHOLARONE™  
Manuscripts

1  
2  
3 **Detection for peripheral and central sensitization at acupoints in patients**  
4  
5  
6 **with unilateral shoulder pain: a cross-sectional matched case-control study**  
7

8 Chao-Qun Yan, Shuai Zhang, Qian-Qian Li, Li-Wen Zhang, Xue-Rui Wang, Qing-Nan Fu, Guang-  
9  
10 Xia Shi, Cun-Zhi Liu\*  
11

12  
13 Acupuncture and Moxibustion Department, Beijing Hospital of Traditional Chinese Medicine  
14 Affiliated to Capital Medical University, 23 Meishuguanhou Street, Dongcheng District, Beijing  
15 100010, China.  
16  
17

18  
19 \*Corresponding author at: Acupuncture and Moxibustion Department, Beijing Hospital of  
20 Traditional Chinese Medicine Affiliated to Capital Medical University, 23 Meishuguanhou  
21 Street, Dongcheng District, Beijing 100010, China. Tel: 0086-010-52176043; Fax: 0086-010-  
22 52176813.  
23  
24

25  
26 E-mail address: [lcz623780@126.com](mailto:lcz623780@126.com)  
27

28  
29 Word count: 4372  
30  
31  
32  
33  
34  
35  
36  
37  
38  
39  
40  
41  
42  
43  
44  
45  
46  
47  
48  
49  
50  
51  
52  
53  
54  
55  
56  
57  
58  
59  
60



## Abstract

**Objective**—To investigate the pattern of experimental pain responses at acupoints in patients with unilateral shoulder pain.

**Design**— A cross-sectional matched case-control study.

**Setting**—Acupuncture and Moxibustion Department, Beijing Hospital of Traditional Chinese Medicine Affiliated to Capital Medical University.

**Participants**—Volunteer sample of 60 participants (30 patients with unilateral shoulder pain, 30 healthy controls).

**Interventions**—Not applicable.

**Main Outcome Measures**—Pressure pain thresholds (PPTs) were measured at four acupoints, including Tianzong (SI 11), Jianliao (SJ 14), Jianyu (LI 15) and Jianzhen (SI 9) on the painful/non-painful side in patients with unilateral shoulder pain or healthy controls, respectively. The correlations between peripheral sensitization index (PSI) and central sensitization index (CSI) were compared in this study.

**Results**—The analysis revealed significantly lower PPT values at acupoints on the painful side compared with non-painful side in patients with shoulder pain ( $P < 0.025$ ). Meanwhile, PPTs on the non-painful side of these patients were lower than the ipsilateral side of healthy controls ( $P < 0.025$ ). No distinct differences of PPT values were found at non-acupoint among the painful/non-painful side in patients with shoulder pain and the ipsilateral side of healthy controls ( $P > 0.05$ ). Additionally, it was observed that the pressure pain assessment acupoints have strong association between the PSI and CSI, and three acupoints of SJ 14, LI 15 and SI 9 showed correlation in PSI or CSI particularly.

**Conclusion**—The results suggest the presence of peripheral and central sensitization at acupoints in participants with unilateral shoulder pain. There exists an obvious relationship among the three acupoints of SJ 14, LI 15 and SI 9, which are usually chosen to treat shoulder pain. The results provide the evidence for acupoints selection to treat shoulder pain by acupuncture.

1  
2  
3 **Keywords:** acupoints; peripheral sensitization; central sensitization; pressure pain threshold;  
4 shoulder pain  
5

### 6 7 **Strengths and limitations of this study** 8

9  
10 This is, to the best of our knowledge, the first study to support an alteration in both peripheral  
11 and central sensitization at acupoints in patients with shoulder pain.  
12

13  
14 The peripheral and central sensitization at acupoints seemed to occur correlatively  
15 independently from the relevant baseline variable.  
16

17  
18 A limitation of this study was that only a pressure pain assessment performed at acupoints,  
19 which might be inadequate to describe the complexity of pain perception.  
20

21  
22 This study was conducted in a single institution and consisted of a primarily female sample,  
23 so the external validity was not clear.  
24

## 25 26 **INTRODUCTION** 27

28  
29 Acupuncture is one of the most widely-used forms of complementary and alternative  
30 medicines. There are approximately 183 countries using acupuncture treatment according to a  
31 survey conducted by the World Federation of Acupuncture and Moxibustion Societies in 2013  
32 [1]. The WHO reports that acupuncture treatment can be beneficial for more than 40 disorders  
33 [2]. Pain is one of those disorders, which is particularly amenable to acupuncture. The evidence  
34 in reviews demonstrates that acupuncture treatment can reduce various types of clinical pain  
35 effectively in multiple clinical trials [3-5]. Recently, a meta-analysis reported that shoulder pain,  
36 low back pain, neck pain, osteoarthritis and chronic headache can be alleviated significantly after  
37 acupuncture treatment [6]. Shoulder pain is the third most common musculoskeletal disorder, of  
38 which the prevalence rate varies from 6.9% to 26% for point prevalence and even increases to  
39 66.7% for lifetime prevalence in a general population [7, 8]. In our previous study, we identified  
40 acupuncture treatment can alleviate shoulder pain, particularly in special acupoints (data  
41 unpublished).  
42  
43  
44  
45  
46  
47  
48  
49  
50

51  
52 Acupoints are special sites at precise locations and lie on ‘meridians’ without a physical  
53 structure. According to the theory of meridians in traditional Chinese medicine, it is well known  
54 that the acupoints reflect disorders of visceral conditions. Many studies have observed visceral  
55  
56  
57  
58  
59

1  
2  
3 lesions result in changed pain perception of some special acupoints on the body surface [9]. Ben  
4 et al assessed the phenomenon of experimental pain-sensitive points in patients with gastric ulcer  
5 or gastritis and found some special acupoints were more sensitive than other areas [10].  
6  
7 Nevertheless, whether acupoints behave more sensitively under musculoskeletal pain has not  
8  
9 been described in detail in previous studies.  
10

11  
12 Sensitization is a nervous system phenomenon that can occur in conjunction with pain [11].  
13  
14 When sensitization is present, there are two types of hypersensitivity including peripheral  
15 sensitization and central sensitization, which are important mechanisms in musculoskeletal pain  
16 conditions [12]. Peripheral sensitization is defined as the broadening of nociception in pain  
17 perception during activities or movements, which typically would be not painful [11]. Central  
18 sensitization refers to an amplification of neural signaling within the central nervous system that  
19 elicits pain hypersensitivity. It reflects increased activity of pain facilitation pathways and  
20 malfunctioning of descending pain inhibitory pathways [13-17].  
21  
22

23  
24 We performed a multicenter, single blind, factorial randomized controlled clinical trial  
25  
26 previously (Number Register: ISRCTN61861069). In the study, we found the phenomenon that  
27 the pain threshold decreased at related acupoints in patients with unilateral shoulder pain was  
28 widespread. Therefore, we chose some patients from the trial to detect whether acupoints are  
29 hypersensitive in musculoskeletal pain disease. We hypothesized that the patients with unilateral  
30 shoulder pain would present peripheral or central sensitization at acupoints as evidenced by  
31 Pressure pain threshold (PPT) detection, when compared with healthy controls. Specifically,  
32 acupoints on the painful side would have lower PPT than on the non-painful side of patients.  
33 Also, acupoints on the non-painful side of patients would be hypersensitive as assessed by PPTs,  
34 with respect to the ipsilateral side of healthy controls. If the results confirm these hypotheses,  
35 then it provides evidence that acupoints exist for peripheral sensitization and central sensitization  
36 phenomenon in patients with unilateral shoulder pain.  
37  
38  
39  
40  
41  
42  
43  
44  
45  
46  
47

## 48 **METHODS AND ANALYSIS**

### 49 **Study design**

1  
2  
3 This cross-sectional matched case-control study was conducted at the Department of  
4 Acupuncture and Moxibustion, Beijing Hospital of Traditional Chinese Medicine Affiliated to  
5 Capital Medical University.  
6  
7

### 8 9 **Participants**

10  
11 Clinical patients—The 30 patients with shoulder pain were chosen from a multicenter,  
12 randomized trial. In total, 164 patients with shoulder pain were recruited from three centers in  
13 the random trial between January 2014 and September 2014. We enrolled the final 30 patients  
14 from 76 patients that screened in the center of Beijing Hospital of Traditional Chinese Medicine  
15 before any treatments were dispensed. The Research Ethical Committee of Beijing Hospital of  
16 Traditional Chinese Medicine Affiliated to Capital Medical University approved the trial  
17 (reference: 201315).  
18  
19

20  
21 The inclusion criteria included presenting with unilateral shoulder pain for at least six weeks  
22 and up to two years, reporting the pain intensity > 50 mm on a visual analogue scale (VAS), and  
23 being right hand dominant, who have not received acupuncture or other analgesic therapies in the  
24 preceding month.  
25  
26

27  
28 The exclusion criteria were as follows: pain in both shoulders; referred pain from the cervical  
29 spine; previous history of shoulder surgery, pectorial muscle pain, thoracic outlet syndrome,  
30 stroke or ipsilateral breast surgery; heart diseases and severe hypertension; osteoarthritis of the  
31 glenohumeral joint or systemic bone and joint disorder (rheumatoid arthritis); endocrine diseases  
32 such as hyperthyroidism; severe infection; undergoing current therapy involving analgesics and  
33 especially major illness depression.  
34  
35

36  
37 Healthy controls—The healthy controls were matched to the patients with shoulder pain  
38 individually. Each healthy control was matched for gender, age ( $\pm 1$  year), ethnicity and dominant  
39 hand to one patient. Healthy controls were recruited from the community via posted flyers and  
40 general advertisements between May 2014 and September 2014. Healthy controls were eligible  
41 if they were not currently performing resistance exercise for the upper extremity. They were  
42 excluded based on the following criteria: receiving acupuncture or other analgesic therapies in  
43 the preceding month, experiencing neck or shoulder pain, having a history of shoulder surgery or  
44  
45  
46  
47  
48  
49  
50  
51  
52  
53  
54  
55  
56  
57  
58  
59  
60

1  
2  
3 neurological impairments of the upper extremity, a shoulder skin infection, having difficulty in  
4 understanding instructions, and taking any pain medication currently.  
5  
6

### 7 **Protocol**

8  
9 All participants completed a packet of questionnaires including demographic data (age, sex,  
10 race, dominant hand) and psychological information before informed consent was obtained. The  
11 patients were initially examined by a researcher who assessed compliance using the inclusion  
12 and exclusion criteria. Beck Depression Inventory (BDI) is a multiple choice self-reported  
13 inventory for measuring the severity of depression [18]. If the BDI outcome is more than 4, the  
14 participants were excluded [19]. Clinical pain intensity was assessed by VAS, which consists a  
15 line of 0–100 mm: 0 representing ‘no pain at all’ and 100 mm representing ‘the most intense pain  
16 imaginable’.  
17  
18

19  
20 After finishing the questionnaires, both shoulders of participants were exposed and the  
21 measurement sites were marked. An expert acupuncturist was responsible for the operation. Five  
22 points were marked in this study and shown in Figure 1 and Appendix Table 1. To assess the  
23 pain sensitivity of acupoints, four acupoints Jianliao (SJ 14), Jianyu (LI 15), Jianzhen (SI 9), and  
24 Tianzong (SI 11) were marked bilaterally with a marker pen drawing a circle (Figure 1. A. B).  
25  
26 To assess the pain sensitivity in the non-acupoint, 2 cm down to Tianzong (SI 11) was marked  
27 bilaterally in participants (Figure 1. B).  
28  
29  
30  
31  
32  
33  
34  
35  
36

### 37 **Measurement of pressure pain thresholds (PPT)**

38  
39 Both shoulders were exposed for examination by an operator. The participants were asked to  
40 take a prone position on the examination bed with a suitable pillow under the chest when  
41 Jianzhen (SI 9), Tianzong (SI 11) and non-acupoint were measured. Then the participants were  
42 required to sit on a chair with a researcher to keep the arm and shoulder in parallel when Jianliao  
43 (SJ 14) and Jianyu (LI 15) were measured.  
44  
45  
46  
47  
48

49 PPT is widely used to evaluate the pain sensory threshold for the patients with shoulder pain  
50 [20]. The lower value of PPT indicates the decreased nociceptive threshold of pain perception  
51 [21]. A handheld electronic pressure algometer (Wagner Instruments, Greenwich, CT) mounted  
52 with a 1 cm<sup>2</sup> rubber tipped plunger was used in this study. The probe was held perpendicular to  
53 marked points bilaterally, and the pressure was increased at a rate of 30kPa/s, in order to avoid  
54  
55  
56  
57  
58  
59  
60

1  
2  
3 potential skin penetration. All participants were instructed to indicate when the pressure became  
4 painful, at that time the pressure was immediately stopped and the digits were recorded. PPT was  
5 calculated as the mean of three trials on each point. There was an approximately 2 min interval  
6 between the repetitions. The operator was not to be told which side is the painful shoulder of  
7 patients and blinded to patients and healthy controls. Additionally, the operator did not have any  
8 basic knowledge of acupoints and did not know whether the measuring sites were acupoints or  
9 not during testing.

### 16 **Data Analysis**

17  
18 The data were double entered with an adequate check in EpiData. SPSS 17.0 software (SPSS  
19 Inc., Chicago, IL, USA) was used for analysis. Discrete variables were summarized by  
20 frequencies and percentages. Distributed data were summarized using mean  $\pm$  standard deviation  
21 (SD) or median and interquartile range (IQR). The distributed data were analyzed using a  
22 parametric statistical test (Pair t-test) if it agreed with normal distribution. Otherwise, the data  
23 were analyzed using a non-parametric (Wilcoxon's signed rank test) statistical test. Shapiro-Wilk  
24 test and observation of histograms and normal probability plots were used for all study variables  
25 to determine whether they followed a normal distribution. To adjust multiple comparisons, an  
26 alpha level of 0.025 was used for all pairwise comparisons.

27  
28  
29  
30  
31  
32  
33  
34  
35  
36  
37  
38  
39  
40  
41  
42  
43  
44  
45  
46  
47  
48  
49  
50  
51  
52  
53  
54  
55  
56  
57  
58  
59  
60  
Peripheral and central sensitization index was used to determine whether pain-sensitivity  
existed at the pressure pain assessment sites. Peripheral sensitization is referred to a patient's  
response for PPT on the painful side that fell below the 25<sup>th</sup> percentile among the non-painful  
side [22]. The PPT value of the 25<sup>th</sup> percentile is determined by the average value of 7<sup>th</sup> and 8<sup>th</sup>  
lowest observations on the non-painful side. We examined a patient's proportional response for  
PPT on the painful side fell below the 25<sup>th</sup> percentile. Each response PPT is considered for  
peripheral sensitization index (PSI). Central sensitization indicates that a patient's response for  
PPT on the non-painful side fell below the 25<sup>th</sup> percentile (the average value of 7<sup>th</sup> and 8<sup>th</sup> lowest  
observations) among the ipsilateral side of healthy controls. We computed the proportional  
responses for PPT on the non-painful side fell below the 25<sup>th</sup> percentile among the ipsilateral side  
of healthy controls. Each response PPT is considered for central sensitization index (CSI). The  
25<sup>th</sup> percentile was suggested as a lower limit reference value for enhanced sensitivity [23]. Each  
index was examined by Pearson's correlation. We determine whether patients with shoulder pain

demonstrated peripheral, central, a mixed-pattern or no sensitization, and analyzed the association between sensitization subgroups and the relevant baseline characteristics including demographic and clinical variables. We analyzed association between sensitization subgroups and the relevant baseline characteristics including demographic and clinical variables. Comparisons among the variables were examined using one way analysis of variance or Chi-square and assessment of 95% confidence intervals (CI). A *P* value <0.05 was defined as statistically significant.

## RESULTS

### Recruitment and baseline characteristics

Between January 2014 and September 2014, thirty patients with shoulder pain (11 males and 19 females) were enrolled in this study. The average age of the thirty patients was  $50.60 \pm 12.19$  years (Table 1). The healthy controls included 11 males and 19 females with a mean age of  $50.63 \pm 12.20$  years. All participants were right hand dominant.

**Table 1** Characteristics of the patients with shoulder pain and healthy controls.

|                             | Patients With Shoulder Pain (N = 30) | Healthy Controls (N = 30) |
|-----------------------------|--------------------------------------|---------------------------|
| Age (years)                 | $50.60 \pm 12.19$                    | $50.63 \pm 12.20$         |
| Sex (females), n (%)        | 19 (63.33)                           | 19 (63.33)                |
| Race (number of Han), n (%) | 30 (100)                             | 30 (100)                  |
| Pain duration (weeks)       | $19.07 \pm 16.99$                    | -                         |
| VAS (median, IQR)           | 70 (50 - 80)                         | -                         |
| BDI (median, IQR)           | 0 (0 - 0)                            | 0 (0 - 0)                 |
| BMI                         | $25.27 \pm 4.17$                     | $24.91 \pm 3.77$          |
| Normal ( $\leq 23.9$ )      | 11                                   | 12                        |
| Overweight (24 - 27.9)      | 12                                   | 14                        |
| Obese ( $\geq 28$ )         | 7                                    | 4                         |

Values represented as N, mean  $\pm$  SD or median, IQR.

Abbreviations: N – Number, SD – standard deviation, VAS – Visual Analogue Scale, BDI– Beck Depression Inventory, BMI – Body Mass Index, IQR – interquartile range.

### PPT comparison of related acupoints

1  
2  
3 For the patients with shoulder pain, lower PPT levels were detected at acupoints on the painful  
4 side compared with the non-painful side (Table 2). The differences were 94.9 (95% CI, 53.47 to  
5 136.33;  $p < 0.001$ ) at Tianzong (SI 11), 102.91 (95% CI, 79.85 to 125.97;  $p < 0.001$ ) at Jianliao  
6 (SJ 14), 91.19 (95% CI, 44.82 to 137.56;  $p < 0.001$ ) at Jianyu (LI 15), and 86.79 (95% CI, 56.30  
7 to 117.28;  $p < 0.001$ ) at Jianzhen (SI 9), respectively.  
8  
9  
10  
11

12 The PPT value difference between the non-painful side of the patients and the ipsilateral side  
13 of healthy controls was also compared. PPTs at the acupoints on non-painful side of the patients  
14 were lower than on the ipsilateral side of healthy controls. The differences were 57.71 (95% CI,  
15 24.72 to 90.70;  $p = 0.001$ ) at Tianzong (SI 11), 81.03 (95% CI, 41.40 to 120.67;  $p < 0.001$ ) at  
16 Jianliao (SJ 14), 72.20 (95% CI, 10.90 to 133.50;  $p = 0.02$ ) at Jianyu (LI 15), and 88.09 (95% CI,  
17 39.88 to 136.30;  $p = 0.001$ ) at Jianzhen (SI 9), respectively.  
18  
19  
20  
21  
22  
23  
24  
25  
26  
27  
28  
29  
30  
31  
32  
33  
34  
35  
36  
37  
38  
39  
40  
41  
42  
43  
44  
45  
46  
47  
48  
49  
50  
51  
52  
53  
54  
55  
56  
57  
58  
59  
60



**Table 2** Pressure pain threshold values for participants

|                  | Patients With Shoulder Pain |                  | Painful vs Non-painful Side |         | Health Controls  | Non-painful Side vs Ipsilateral Side |         |
|------------------|-----------------------------|------------------|-----------------------------|---------|------------------|--------------------------------------|---------|
|                  | Painful Side                | Non-painful Side | Mean (95% CI)               | P value | Ipsilateral Side | Mean (95% CI)                        | P value |
| Tianzong (SI 11) | 414.83 ± 135.61             | 509.73 ± 168.05  | 94.90 (53.47, 136.33)       | <0.001  | 567.44 ± 153.84  | 57.71 (24.72, 90.70)                 | 0.001   |
| Jianliao (SJ 14) | 469.70 ± 181.07             | 572.61 ± 196.71  | 102.91 (79.85, 125.97)      | <0.001  | 653.64 ± 211.50  | 81.03 (41.40, 120.67)                | <0.001  |
| Jianyu (LI 15)   | 434.79 ± 140.39             | 525.98 ± 160.16  | 91.19 (44.82, 137.56)       | <0.001  | 598.18 ± 181.76  | 72.20 (10.90, 133.50)                | 0.02    |
| Jianzhen (SI 9)  | 453.08 ± 154.54             | 539.87 ± 167.59  | 86.79 (56.30, 117.28)       | <0.001  | 627.96 ± 209.67  | 88.09 (39.88, 136.30)                | 0.001   |
| Non-acupoints    | 521.34 ± 147.02             | 538.67 ± 153.89  | 17.33 (-36.99, 2.34)        | 0.08    | 549.18 ± 143.66  | 10.51 (-18.87, 39.89)                | 0.47    |

Values represented as mean ± SD. The unit of values was Kpa. Abbreviations: SD – Standard Deviation, CI –Confidence Intervals.

### PPT comparison of non-acupoint

Figure 2 showed PPT at the non-acupoint. For the patients, the analysis revealed no obvious difference of 17.33 (95% CI, -36.99 to 2.34;  $p = 0.08$ ) in PPT value on the painful side compared to the non-painful side. Meanwhile, no significant difference of PPT level, which behaved 10.51 (95% CI, -18.87 to 39.89;  $p = 0.47$ ), was found between the non-painful side of the patients and the ipsilateral side of healthy controls.

### Peripheral Sensitization Index

All measured acupoints demonstrated side-to-side difference in the patients. They were used to compute a peripheral sensitization index (PSI). PPT values at acupoints on the painful side below the 25<sup>th</sup> percentile of the non-painful side indicated peripheral sensitization. The proportion of the patients with peripheral sensitization were 77% at Tianzong (SI 11), 37% at Jianliao (SJ 14), 43% at Jianyu (LI 15) and 60% at Jianzhen (SI 9) (Table 3). Significant correlation (Appendix Table 2) was observed in PSI among Jianliao (SJ 14), Jianyu (LI 15) and Jianzhen (SI 9) ( $p < 0.01$ ). There was no significant association between PSI and other baseline variables ( $p > 0.05$ ) (Appendix Table 3).

**Table 3.** Frequencies meeting the peripheral sensitization index (PSI) and central sensitization index (CSI) based on PPT response.

| Sites            | PSI     | CSI     | PSI×CSI |
|------------------|---------|---------|---------|
| Tianzong (SI11)  | 23 (77) | 13 (43) | 13 (43) |
| Jianliao (SJ 14) | 11 (37) | 17 (57) | 9 (30)  |
| Jianyu (LI 15)   | 13 (43) | 19 (63) | 12 (40) |
| Jianzhen (SI 9)  | 18 (60) | 18 (60) | 15 (50) |

Values are individual counts (percentages). Abbreviations: PPT – Pressure-pain threshold.

### Central Sensitization Index

The four measured acupoints demonstrated difference between the non-painful side of patients and the ipsilateral side of healthy controls. Therefore, they were used to compute central sensitization index (CSI). The proportion of the patients were 43% at Tianzong (SI 11), 57% at

1  
2  
3 Jianliao (SJ 14), 63% at Jianyu (LI 15) and 60% at Jianzhen (SI 9) (Table 3). A distinct and  
4 significant association (Appendix Table 4) was observed between Jianliao (SJ 14) and Jianyu (LI  
5 15) ( $p < 0.01$ ), Jianyu (LI 15) and Jianzhen (SI 9) ( $p < 0.01$ ) in CSI. Appendix Table 5 showed  
6 no statistical significance correlations between CSI and relevant baseline characteristics ( $p >$   
7 0.05).  
8  
9  
10

### 11 12 **Comparison of Peripheral and Central Sensitization Index**

13  
14  
15 The frequencies of the patients who had both PSI and CSI were 43% at Tianzong (SI 11), 30%  
16 at Jianliao (SJ 14), 40% at Jianyu (LI 15) and 50% at Jianzhen (SI 9), respectively (Table 3).  
17 Significant correlation was observed between PSI and CSI in measured acupoints ( $p < 0.05$ )  
18 (Appendix Table 6). Table 4 showed that association between subgroups and sex approached  
19 statistical significance at the assessment acupoints ( $p < 0.001$ ). No significant association was  
20 observed between subgroups and other baseline variable ( $p > 0.05$ ).  
21  
22  
23  
24  
25  
26  
27  
28  
29  
30  
31  
32  
33  
34  
35  
36  
37  
38  
39  
40  
41  
42  
43  
44  
45  
46  
47  
48  
49  
50  
51  
52  
53  
54  
55  
56  
57  
58  
59  
60

**Table 4** Demographic, clinical, and psychological characteristics of sensitization groups.

|                         | Peripheral Sensitization | Central Sensitization | Peripheral and Central Sensitization | No Sensitization     | P value |
|-------------------------|--------------------------|-----------------------|--------------------------------------|----------------------|---------|
| <b>Tianzong (SI11)</b>  |                          |                       |                                      |                      |         |
| Age (years)             | 48.78 (43.45, 54.21)     | 50.38 (44.02, 56.75)  | 50.38 (44.02, 56.75)                 | 56.57 (48.00, 65.15) | 0.47    |
| Sex (%females)          | 78.28 (56.14, 92.52)     | 76.92 (46.16, 94.89)  | 76.92 (46.16, 94.89)                 | 14.29 (3.68, 57.62)  | <0.001  |
| Pain duration (weeks)   | 21.04 (12.91, 29.17)     | 24.31 (10.23, 38.38)  | 24.31 (10.23, 38.38)                 | 12.57 (7.16, 17.99)  | 0.60    |
| VAS                     | 68.04 (61.25, 74.84)     | 71.15 (62.77, 79.53)  | 71.15 (62.77, 79.53)                 | 60.00 (52.45, 67.55) | 0.34    |
| <b>Jianliao (SJ 14)</b> |                          |                       |                                      |                      |         |
| Age (years)             | 48.09 (38.47, 57.71)     | 49.59 (43.35, 55.82)  | 48.89 (38.97, 58.81)                 | 53.27 (46.22, 60.33) | 0.78    |
| Sex (%females)          | 100                      | 82.35 (56.42, 96.62)  | 100                                  | 27.27 (6.01, 60.95)  | <0.001  |
| Pain duration (weeks)   | 22.55 (10.81, 34.28)     | 23.29 (12.80, 33.79)  | 22.22 (7.96, 36.49)                  | 11.64 (7.07, 16.21)  | 0.32    |
| VAS                     | 70.00 (59.17, 80.83)     | 68.82 (61.14, 76.51)  | 72.22 (59.60, 84.84)                 | 63.18 (53.41, 72.95) | 0.59    |
| <b>Jianyu (LI 15)</b>   |                          |                       |                                      |                      |         |
| Age (years)             | 46.92 (38.29, 55.56)     | 47.47 (41.20, 53.75)  | 45.42 (36.64, 54.19)                 | 55.10 (48.95, 61.25) | 0.32    |
| Sex (%females)          | 92.31 (63.76, 99.81)     | 89.47 (66.90, 98.70)  | 100                                  | 20.00 (2.54, 55.41)  | <0.001  |
| Pain duration (weeks)   | 19.69 (9.51, 29.87)      | 21.89 (12.14, 31.65)  | 20.67 (9.73, 31.60)                  | 14.80 (9.23, 20.37)  | 0.76    |
| VAS                     | 68.46 (59.62, 77.30)     | 66.84 (59.65, 74.04)  | 66.67 (57.96, 75.38)                 | 62.50 (53.38, 71.62) | 0.79    |
| <b>Jianzhen (SI 9)</b>  |                          |                       |                                      |                      |         |
| Age (years)             | 48.22 (41.53, 54.91)     | 48.00 (41.35, 54.65)  | 46.27 (38.65, 53.88)                 | 53.33 (45.49, 61.17) | 0.64    |
| Sex (%females)          | 83.33 (58.57, 96.44)     | 83.33 (58.57, 96.44)  | 93.33 (67.97, 99.83)                 | 33.33 (7.45, 70.06)  | <0.001  |
| Pain duration (weeks)   | 17.11 (9.58, 24.64)      | 18.22 (10.77, 25.67)  | 18.67 (9.70, 27.63)                  | 24.00 (6.74, 41.26)  | 0.78    |
| VAS                     | 67.78 (60.43, 75.13)     | 66.67 (58.85, 74.48)  | 68.00 (59.32, 76.68)                 | 65.00 (53.79, 76.21) | 0.97    |

Values presented as % (for sex) or mean with [95% CI]. Abbreviations: VAS – Visual Analogue Acale.

## DISCUSSION

The current results were in agreement with a peripherally sensitized state at acupoints which is determined by the side-to-side difference of PPT values in patients with unilateral shoulder pain. Central sensitization at acupoints was conducted by comparing pressure sensitivity in patients with age- and sex-matched healthy controls. No obvious PPT values difference was found at the non-acupoint among the painful side, non-painful side and ipsilateral side. To advance this line of research, association between peripheral and central sensitization at acupoints was examined. We found that the patients displayed a significant association between peripheral and central sensitization at measured acupoints. This finding demonstrated that there existed two patterns of sensitization in acupoints. In addition, three acupoints Jianliao (SJ 14), Jianyu (LI 15) and Jianzhen (SI 9) that are normally used for treating shoulder pain had correlation.

Previous investigations had reported that splanchnic diseases can induce mechanical hyperalgesia on the corresponding acupoints when pressed [24]. Acupoints turned to the “activated mode” or “sensitized mode” from the “silent mode” in pathological conditions. This phenomenon is called “acupoint sensitization”. At some acupoints there appeared to be a hypersensitivity of temperature (heat-sensitization) or pain threshold (pain-sensitization) under visceral pain [9, 25]. But unlike those studies, we examined acupoints in patients with musculoskeletal pain in this study.

Central sensitization is challenging clinically, since no standard assessment exists. Some studies recommended the use of various modalities for pain sensitivity at local and distal locations [21, 26]. However, other researches showed that decreased PPTs at the painful and non-painful shoulder, but not at the muscle tibialis anterior [27-29]. According to “Criteria for the Classification of Central Sensitization Pain”, patients with diffuse pain distribution, allodynia, and hyperalgesia are more likely to present with central sensitization. One of the patterns of pain distribution is that patients have bilateral pain/mirror pain [17]. In the patients with shoulder pain, the increased sensitivity to mechanical input in the contralateral shoulder would be interpreted as central sensitization [11]. A large number of studies define central sensitization as pain sensitivity at local and distal locations. We chose bilateral pain to define central sensitization, unlike earlier studies, and to determine whether there existed patterns of experimental pain responses at shoulder acupoints.

1  
2  
3 Collectively, the findings of the study support the alteration in both peripheral and central  
4 sensitization at acupoints in patients with musculoskeletal pain. We determined whether  
5 peripheral and central sensitization were more likely to occur together or alone. In Table 3, we  
6 describe that 19 patients had central sensitization and 13 patients had peripheral sensitization in  
7 Jianyu (LI 15). Previous study showed that long-term peripheral sensitization can lead central  
8 nervous system changes occurring and resulting in central sensitization [11]. However, there  
9 were 6 patients having only central sensitization without peripheral sensitization. This result  
10 indicates that peripheral sensitization is not a prerequisite for the presence of central sensitization  
11 at acupoints. In PSI or CSI, the strong association was found at three acupoints of Jianliao (SJ  
12 14), Jianyu (LI 15) and Jianzhen (SI 9). From the clinical perspective, Jianliao (SJ 14), Jianyu  
13 (LI 15) and Jianzhen (SI 9) are frequently chosen to treat shoulder pain in clinical practice, and  
14 have been called “shoulder three acupoints” by acupuncturists [30, 31]. Jianyu (LI 15), Jianliao  
15 (SJ 14) and Jianzhen (SI 9), are highly-refined acupoints used to treat shoulder pain in the clinic,  
16 and have been proven to be effective at regulating muscle strength and tension of shoulder joint  
17 [32]. The strong association among Jianliao (SJ 14), Jianyu (LI 15) and Jianzhen (SI 9) is  
18 consistent with the conception of traditional Chinese medicine.  
19  
20  
21  
22  
23  
24  
25  
26  
27  
28  
29  
30

31 To our knowledge, this is the first study to research peripheral and central sensitization at  
32 acupoints in patients with shoulder pain. One of the advantages of the study is that the measured  
33 acupoints and non-acupoint were marked by an acupuncturist with 24 years of experience in  
34 clinical acupuncture treatment. The evaluator who measured PPTs also has extensive experience  
35 with using the algometer and without basic knowledge of acupoints. The internal validity is  
36 increased by blinding the evaluator who did not know whether the measured sites were acupoints  
37 or not during testing. In addition, the evaluator was blinded as to whether the test participant was  
38 a patient or a healthy control. The participants were asked to take different positions when  
39 different acupoints were measured. For example, the participants were required take a prone  
40 position on the examination bed with a suitable pillow under the chest and the arms close to the  
41 body when Jianzhen (SI 9) was measured. It increases the reliability of testing PPT over a soft  
42 area.  
43  
44  
45  
46  
47  
48  
49  
50  
51

52 Specifically, the result indicates that peripheral and central sensitization at acupoints is not  
53 relevant to pain duration. Moreover, there is no obvious evidence that the pattern of sensitization  
54  
55  
56  
57  
58  
59  
60

1  
2  
3 has relation with the degree of severity of the clinical condition as measured by VAS. These  
4 changes are consistent with the idea of traditional Chinese medicine that acupoints are the crucial  
5 reflex points of body lesions under pathological circumstance. Hyperalgesia and skin  
6 sensitization can occur at corresponding acupoints in the presence of some diseases [33].  
7 Morphological structure studies have reported that the nervous system and blood vessels might  
8 have a close relationship with acupoints [34-36]. For example, abundant microvessels existed at  
9 the acupoints of Zhongji (RN3) and Zusanli (ST36) in contrast to the surrounding tissues [37].  
10 The acupoints also have a high density of nerve endings including A- and C- afferent fibers [38,  
11 39]. Those characteristics of higher concentration of neural, vascular elements and mast cells  
12 could make pain perception more sensitive, and might contribute to peripheral sensitivity. To  
13 confirm the specificity of acupoints, we selected a non-acupoint in the infraspinatus muscle.  
14 Obviously, no significant difference was found in PPT values among the painful/ non-painful  
15 side of patients and the ipsilateral side of healthy controls. The finding proved that acupoints  
16 become a specific reflex point that respond to the presence of musculoskeletal pain. Our study  
17 provides evidence that there is an association with acupoints sensitization and gender. Pain  
18 difference in gender has become an increased topic in recent years, and lower PPT values in  
19 women than that in men were found either in healthy subjects or in clinical patients [40]. But, the  
20 significant difference may be accounted for by the fact that the majority of the patients were  
21 female (63.33%) in the study.  
22  
23  
24  
25  
26  
27  
28  
29  
30  
31  
32  
33  
34  
35  
36

37 There are limitations that should be kept in mind regarding this study. Pain perception is  
38 multidimensional. PPT measurements are just a mechanical and standardized stimulation and are  
39 inadequate to describe the complexity of pain perception. The multimodal approach should be  
40 used to provide the details of the pain system in both normal and pathophysiological situations,  
41 such as different stimulus modalities and quantitative assessment of various pain mechanisms.  
42 Second, the non-acupoint was chosen as 2 cm down from Tianzong (SI 11) because the shoulder  
43 blade is relatively flat and may reduce the measurement errors between acupoints and non-  
44 acupoints. In the clinical trial published recently, the distance was 1 cun (2-3 cm) between the  
45 non-acupoints and acupoints, and clinical outcome showed that acupoints treatment alleviated  
46 symptoms superior to non-acupoints treatment [41]. The measured sites are adjacent in some  
47 studies including PPT measured [20, 42]. The distance is 2 cm between the non-acupoint and  
48 Tianzong (SI 11), which is acceptable in our study. For reducing the stimulation effect, there is  
49  
50  
51  
52  
53  
54  
55  
56  
57  
58  
59  
60

1  
2  
3 an approximately 2 min interval between the repetitions. The probability of a possible  
4 stimulation by too close to an acupoint is low but it could not be ruled out completely. In  
5 addition, Ashi points also named reflexing points or tender spots. They are the phenomenon  
6 acupoints or temporary acupoints, which are dissimilar from acupoints of the fourteen meridians  
7 or extraordinary points. Generally, Ashi points have no specific names and definite locations,  
8 and will vanish after disease recovered. The aim of our study is to investigate the pattern of  
9 experimental pain responses at acupoints, which have specific names and definite locations. For  
10 that reason, the Ashi points do not take into account in this study. Further studies need to be  
11 conducted to confirm the phenomena observed here.  
12  
13  
14  
15  
16  
17  
18

## 19 CONCLUSIONS

20  
21  
22 In conclusion, there exists a mixed presence of sensitization patterns at acupoints in patients  
23 with unilateral shoulder pain and a strong correlation among Jianliao (SJ 14), Jianyu (LI 15) and  
24 Jianzhen (SI 9). Future research utilizing the multimodal pain approach should be conducted,  
25 such as suprathreshold heat pain response, to determine various sensitivity mechanisms.  
26  
27  
28  
29  
30  
31  
32  
33

## 34 Legends

35  
36 **Figure 1.** The pressure pain assessment sites in the present study. (A) Locations for the pressure  
37 pain threshold (PPT) measurement at Jianliao (SJ 14), Jianyu (LI 15) and Jianzhen (SI 9). (B)  
38 Locations for the PPT measurement at Tianzong (SI 11) and Non-acupoint.  
39  
40  
41  
42  
43

44 **Figure 2.** The values of pressure pain threshold (PPT) at the non-acupoint. Values are mean  $\pm$   
45 SD.  
46  
47  
48  
49

## 50 Footnotes

51  
52 **Contributors** Conceived and designed the experiments: Qian-Qian Li, Cun-Zhi Liu. Performed  
53 the experiments: Guang-Xia Shi, Qing-Nan Fu, Chao-Qun Yan, Shuai Zhang. Analyzed the data:  
54  
55  
56  
57  
58  
59  
60



1  
2  
3 Li-Wen Zhang, Xue-Rui Wang. Wrote the paper: Chao-Qun Yan, Qian-Qian Li. All authors  
4 approved the final manuscript.  
5  
6

7 **Funding** This work was supported by Beijing Municipal Administration of Hospitals Clinical  
8 Medicine Development of Special Funding Support grant number XMLX201607 and  
9 ZYLX201412.  
10  
11

12  
13 **Competing interests** We have read and understood BMJ policy on declaration of interests and  
14 declare that we have no competing interests.  
15  
16

17 **Ethics approval** The Research Ethical Committee of Beijing Hospital of Traditional Chinese  
18 Medicine Affiliated to Capital Medical University approved the trial.  
19  
20

21 **Patient consent** Obtained.  
22

23  
24 **Provenance and peer review** Not commissioned; externally peer reviewed.  
25

26 **Data Sharing Statement** No additional data are available.  
27

## 28 **References**

- 29  
30  
31 1. WHO Traditional Medicine Strategy: 2014–2023. ISBN: 978 92 4 150609 0 (2013);  
32 Available at [http://www.who.int/edicines/publications/traditional/trm\\_strategy14\\_23/en/](http://www.who.int/edicines/publications/traditional/trm_strategy14_23/en/)  
33  
34  
35 2. <http://apps.who.int/medicinedocs/pdf/s4926e/s4926e.pdf>  
36  
37 3. De Kooning M, Tobbackx Y, Meeus M et al. Acupuncture-Analgesia Following a Single  
38 Treatment Session in Chronic Whiplash is Unrelated to Autonomic Nervous System  
39 Changes: A Randomized Cross-over Trial. *Pain physician* 2015;18(6):527-536.  
40  
41  
42 4. MacPherson H, Tilbrook H, Richmond S et al. Alexander Technique Lessons or  
43 Acupuncture Sessions for Persons With Chronic Neck Pain: A Randomized Trial. *Annals*  
44 *of internal medicine* 2015;163(9):653-662.5.  
45  
46  
47 5. Fister DG, Cassileth BR, Deng GE et al. Acupuncture for pain and dysfunction after neck  
48 dissection: results of a randomized controlled trial. *Journal of clinical oncology*  
49  
50  
51  
52  
53  
54  
55  
56  
57  
58  
59  
60

- 1  
2  
3 2010;28(15):2565-2570.  
4  
5  
6 6. Vickers AJ, Cronin AM, Maschino AC et al. Acupuncture for chronic pain: individual  
7 patient data meta-analysis. *Archives of internal medicine* 2012;172(19):1444-1453.  
8  
9  
10 7. Luime JJ, Koes BW, Hendriksen IJ et al. Prevalence and incidence of shoulder pain in the  
11 general population; a systematic review. *Scand. J. Rheumatol.* 2004;33(2):73-81.  
12  
13  
14 8. Luime JJ, Koes BW, Miedem HS et al. High incidence and recurrence of shoulder and  
15 neck pain in nursing home employees was demonstrated during a 2-year follow-up. *J.*  
16 *Clin. Epidemiol.* 2005;58(4):407-413.  
17  
18  
19 9. Rong PJ, Li S, Ben H et al. Peripheral and spinal mechanisms of acupoint sensitization  
20 phenomenon. *Evidence-based complementary and alternative medicine*  
21 2013;2013:742195.  
22  
23  
24 10. Ben H, Li L, Rong PJ et al. Observation of Pain-Sensitive Points along the Meridians in  
25 Patients with Gastric Ulcer or Gastritis. *Evidence-based complementary and alternative*  
26 *medicine* 2012;2012:130802.  
27  
28  
29 11. Borstad J, Woeste C. The role of sensitization in musculoskeletal shoulder pain. *Brazilian*  
30 *journal of physical therapy* 2015;19(4):251-257.  
31  
32  
33 12. Arendt-Nielsen L, Fernández-de-Las-Peñas C, Graven-Nielsen T. Basic aspects of  
34 musculoskeletal pain: from acute to chronic pain. *The Journal of manual & manipulative*  
35 *therapy* 2011;19(4):186-93.  
36  
37  
38 13. Woolf CJ. Central sensitization: implications for the diagnosis and treatment of pain. *Pain*  
39 2011;152(3 Suppl): S2–15.  
40  
41  
42 14. Nijs J, Van Houdenhove B, Oostendorp RA. Recognition of central sensitization in  
43 patients with musculoskeletal pain: Application of pain neurophysiology in manual  
44  
45  
46  
47  
48  
49  
50  
51  
52  
53  
54  
55  
56  
57  
58  
59  
60

- 1  
2  
3 therapy practice. *Manipulation Association of Chartered Physiotherapists* 2010;15:135-  
4  
5 141.  
6  
7  
8 15. Staud R, Craggs JG, Robinson ME, et al. Brain activity related to temporal summation of  
9  
10 C-fiber evoked pain. *Pain* 2007;129:130-142.  
11  
12  
13 16. Meeus M, Nijs J. Central sensitization: A biopsychosocial explanation for chronic  
14  
15 widespread pain in patients with fibromyalgia and chronic fatigue syndrome. *Clinical*  
16  
17 *rheumatology* 2007; 26:465-473.  
18  
19  
20 17. Nijs J, Torres-Cueco R, van Wilgen CP, et al. Applying modern pain neuroscience in  
21  
22 clinical practice: criteria for the classification of central sensitization pain. *Pain Physician*  
23  
24 2014;17(5):447-57.  
25  
26  
27 18. Smarr KL, Keefer AL. Measures of depression and depressive symptoms: Beck  
28  
29 Depression Inventory-II (BDI-II), Center for Epidemiologic Studies Depression Scale  
30  
31 (CES-D), Geriatric Depression Scale (GDS), Hospital Anxiety and Depression Scale  
32  
33 (HADS), an Patient Health Questionnaire-9 (PHQ-9). *Arthritis care & research* 2011;63  
34  
35 Suppl 11:S454-466.  
36  
37 19. Zheng HB, Zheng YP. [The application of Beck Depression Inventory in depression  
38  
39 patients]. *Chinese Journal of Nervous and Mental Diseases*. 1987;13(4):236  
40  
41 20. Ge HY, Fernandez-de-Las-Penas C, Madeleine P, Arendt-Nielsen L. Topographical  
42  
43 mapping and mechanical pain sensitivity of myofascial trigger points in the infraspinatus  
44  
45 muscle. *European journal of pain* 2008;12(7):859-865.  
46  
47  
48 21. Paul TM, Soo Hoo J, Chae J, Wilson RD. Central hypersensitivity in patients with  
49  
50 subacromial impingement syndrome. *Arch. Phys. Med. Rehabil.* 2012;93(12):2206-2209.  
51  
52  
53 22. Coronado RA, Simon CB, Valencia C, George SZ. Experimental pain responses support  
54  
55 peripheral and central sensitization in patients with unilateral shoulder pain. *The Clinical*  
56  
57  
58  
59

- 1  
2  
3 *journal of pain* 2014;30(2):143-151.  
4  
5  
6 23. Neziri AY, Scaramozzino P, Andersen OK, et al. Reference values of mechanical and  
7 thermal pain tests in a pain-free population. *European journal of pain*. 2011;15(4):376-83.  
8  
9  
10 24. Chae Y, Kim HY, Lee HJ et al. The alteration of pain sensitivity at disease-specific  
11 acupuncture points in premenstrual syndrome. *The journal of physiological sciences*  
12  
13 2007;57(2):115-119.  
14  
15  
16 25. Peles S, Miranda A, Shaker R, Sengupta JN. Acute nociceptive somatic stimulus  
17 sensitizes neurones in the spinal cord to colonic distension in the rat. *The Journal of*  
18  
19 *physiology* 2004;560(Pt 1):291-302.  
20  
21  
22  
23 26. Nijs J, Van Houdenhove B, Oostendorp RA. Recognition of central sensitization in  
24 patients with musculoskeletal pain: Application of pain neurophysiology in manual  
25  
26 therapy practice. *Manipulation Association of Chartered Physiotherapists*. 2010;15:135-  
27  
28 141.  
29  
30  
31  
32 27. Ge HY, Fernández-de-las-Peñas C, Arendt-Nielsen L. Sympathetic facilitation of  
33 hyperalgesia evoked from myofascial tender and trigger points in patients with unilateral  
34  
35 shoulder pain. *Clinical neurophysiology*. 2006;117:1545–1550.  
36  
37  
38  
39 28. Albuquerque-Sendín F, Camargo PR, Vieira A, et al. Bilateral myofascial trigger points  
40 and pressure pain thresholds in the shoulder muscles in patients. *The Clinical journal of*  
41  
42 *pain*. 2013;29(6):478-86.  
43  
44  
45  
46 29. Gwilym SE, Oag HC, Tracey I, et al. Evidence that central sensitisation is present in  
47 patients with shoulder impingement syndrome and influences the outcome after surgery.  
48  
49 The Journal of bone and joint surgery. *British volume*. 2011;93(4):498-502.  
50  
51  
52  
53 30. Chen L. [A new thinking of acupuncture and moxibustion treatment of shoulder pain  
54  
55  
56  
57  
58  
59  
60

- 1  
2  
3 After hemiplegia]. *Zhongguo zhen jiu = Chinese acupuncture & moxibustion*  
4  
5 2006;26(9):669-671.  
6  
7  
8 31. Li N, Tian FW, Wang CW et al. [Double-center randomized controlled trial on post-  
9  
10 stroke shoulder pain treated by electroacupuncture combined with Tuina]. *Zhongguo zhen*  
11  
12 *jiu = Chinese acupuncture & moxibustion* 2012;32(2):101-105.  
13  
14  
15 32. Chen MY, Pu QQ, Liu SY, Jiang ZY. [Efficacy comparison of different stimulation  
16  
17 therapies for periartthritis of shoulder]. *Zhongguo zhen jiu = Chinese acupuncture &*  
18  
19 *moxibustion* 2013;33(2):109-112.  
20  
21  
22 33. Li L, Yu L, Rong P et al. Visceral nociceptive afferent facilitates reaction of subnucleus  
23  
24 reticularis dorsalis to acupoint stimulation in rats. *Evidence-based complementary and*  
25  
26 *alternative medicine* 2013;2013:931283.  
27  
28  
29 34. Kuo TC, Lin CW, Ho FM. The soreness and numbness effect of acupuncture on skin  
30  
31 blood flow. *The American journal of Chinese medicine* 2004;32(1):117-129.  
32  
33  
34 35. Zhang D, Yan X, Zhang X et al. Synchrotron radiation phase-contrast X-ray CT imaging  
35  
36 of acupuncture points. *Analytical and bioanalytical chemistry* 2011;401(3):803-808.  
37  
38  
39 36. Wick F, Wick N, Wick MC. Morphological analysis of human acupuncture points  
40  
41 through immunohistochemistry. *American journal of physical medicine & rehabilitation /*  
42  
43 *Association of Academic Physiatrists* 2007;86(1):7-11.  
44  
45  
46 37. Oh DS, Kang W, Choi SM, Son CG. Effect of acupuncture for gastrointestinal activity  
47  
48 differs depending on the pathophysiological condition. *Acupuncture in medicine : journal*  
49  
50 *of the British Medical Acupuncture Society* 2011;29(4):316-317.  
51  
52  
53 38. Li AH, Zhang JM, Xie YK. Human acupuncture points mapped in rats are associated  
54  
55 with excitable muscle/skin-nerve complexes with enriched nerve endings. *Brain research*  
56  
57  
58  
59  
60

- 1  
2  
3 2004;1012(1-2):154-159.  
4  
5  
6 39. Zhu B, Xu WD, Rong PJ et al. A C-fiber reflex inhibition induced by electroacupuncture  
7  
8 with different intensities applied at homotopic and heterotopic acupoints in rats  
9  
10 selectively destructive effects on myelinated and unmyelinated afferent fibers. *Brain*  
11  
12 *research* 2004;1011(2):228-237.  
13  
14 40. Tschugg A, Loscher WN, Hartmann S et al. Gender Influences Radicular Pain Perception  
15  
16 in Patients with Lumbar Disc Herniation. *J Womens Health* 2015;24(9):771-776.  
17  
18 41. Liu Z, Yan S, Wu J, et al. Acupuncture for Chronic Severe Functional Constipation: A  
19  
20 Randomized Trial. *Annals of Internal Medicine*. 2016;12(6);165(11):761-769.  
21  
22  
23 42. Binderup AT, Arendt-Nielsen L, Madeleine P. Pressure pain threshold mapping of the  
24  
25 trapezius muscle reveals heterogeneity in the distribution of muscular hyperalgesia after  
26  
27 eccentric exercise. *European Journal of Pain*. 2010;14(7):705-12.  
28  
29  
30  
31  
32  
33  
34  
35  
36  
37  
38  
39  
40  
41  
42  
43  
44  
45  
46  
47  
48  
49  
50  
51  
52  
53  
54  
55  
56  
57  
58  
59  
60

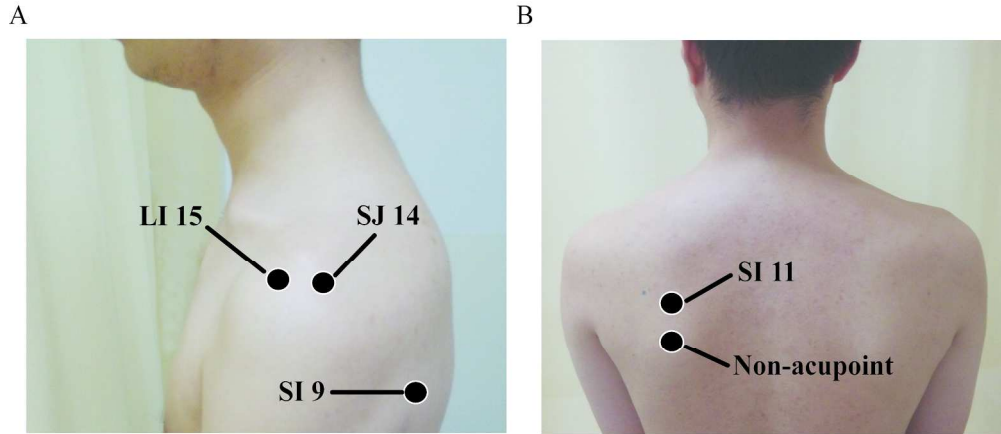

233x101mm (300 x 300 DPI)

Peer review only

1  
2  
3  
4  
5  
6  
7  
8  
9  
10  
11  
12  
13  
14  
15  
16  
17  
18  
19  
20  
21  
22  
23  
24  
25  
26  
27  
28  
29  
30  
31  
32  
33  
34  
35  
36  
37  
38  
39  
40  
41  
42  
43  
44  
45  
46  
47  
48  
49  
50  
51  
52  
53  
54  
55  
56  
57  
58  
59  
60

1  
2  
3  
4  
5  
6  
7  
8  
9  
10  
11  
12  
13  
14  
15  
16  
17  
18  
19  
20  
21  
22  
23  
24  
25  
26  
27  
28  
29  
30  
31  
32  
33  
34  
35  
36  
37  
38  
39  
40  
41  
42  
43  
44  
45  
46  
47  
48  
49  
50  
51  
52  
53  
54  
55  
56  
57  
58  
59  
60

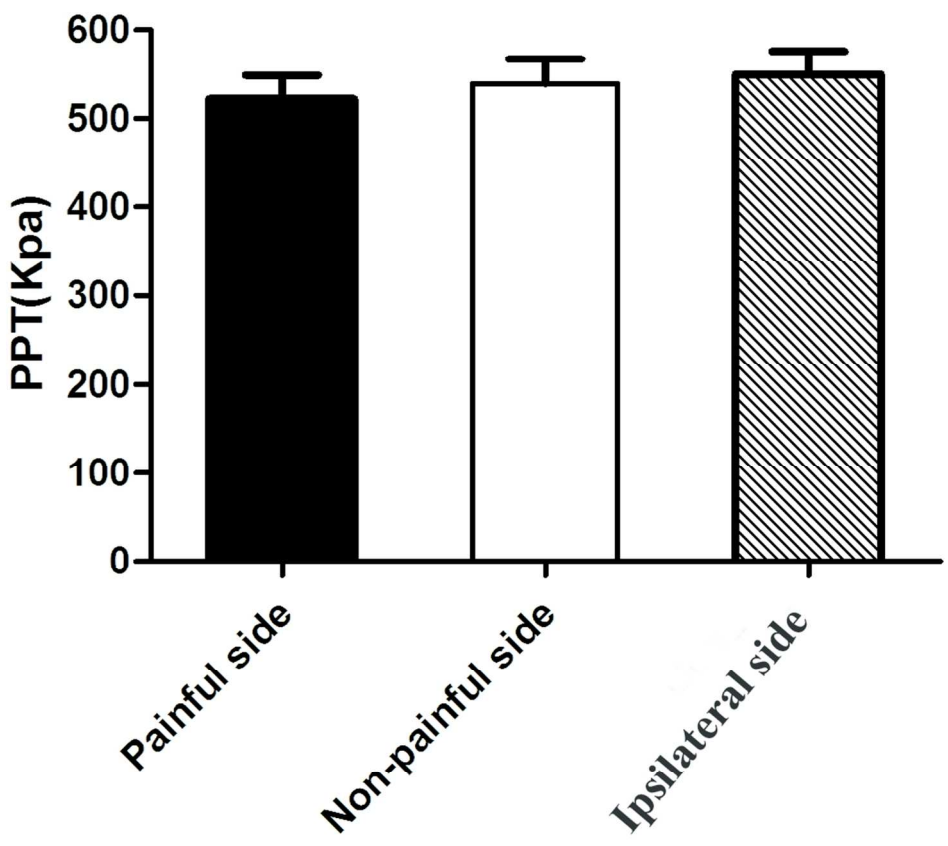

96x88mm (300 x 300 DPI)

BMJ



**Appendix Table 1.** Locations for the pressure pain assessment sites in the present study.

| Points           | Location                                                                                                                                                                                                                                                                 |
|------------------|--------------------------------------------------------------------------------------------------------------------------------------------------------------------------------------------------------------------------------------------------------------------------|
| Jianliao (SJ 14) | In the depression posterior and inferior to the acromion when arm is abducted.                                                                                                                                                                                           |
| Jianyu (LI 15)   | In the depression between the acromial extremity of the clavicle and the great tuberosity of humerus; or when the arm is in full abduction, the acupoint is in the depression at the anterior border of the acromioclavicular joint, and superior to the shoulder joint. |
| Jianzhen (SI 9)  | 1 cun directly above the posterior end of the axillary fold when the arm is abducted.                                                                                                                                                                                    |
| Tianzong (SI 11) | In the depression in the center of the subscapular fossa, at the point 1/3 of the line between the lower border of the mesoscapula and lower angle of capula.                                                                                                            |
| Non-acupoint     | 2 cm down to Tianzong (SI 11).                                                                                                                                                                                                                                           |

**Appendix Table 2.** Correlation of peripheral sensitization index (PSI) among acupoints.

|                  | PSI             |                  |                |                 |
|------------------|-----------------|------------------|----------------|-----------------|
|                  | Tianzong (SI11) | Jianliao (SJ 14) | Jianyu (LI 15) | Jianzhen (SI 9) |
| Tianzong (SI11)  | 1.00            | 0.26             | 0.32           | 0.35            |
| Jianliao (SJ 14) | 0.26            | 1.00             | 0.73*          | 0.62*           |
| Jianyu (LI 15)   | 0.32            | 0.73*            | 1.00           | 0.44*           |
| Jianzhen (SI 9)  | 0.35            | 0.62*            | 0.44*          | 1.00            |

Values are Pearson's correlation. \*Significant association between variables ( $p < 0.01$ ).

**Appendix Table 3.** Correlation between peripheral sensitization indexes (PSI) and relevant baseline characteristics.

|                       | PSI              |                  |                |                 |
|-----------------------|------------------|------------------|----------------|-----------------|
|                       | Tianzong (SI 11) | Jianliao (SJ 14) | Jianyu (LI 15) | Jianzhen (SI 9) |
| Age (years)           | -0.28            | -0.13            | -0.21          | -0.22           |
| Pain duration (weeks) | 0.21             | 0.20             | -0.10          | -0.20           |
| VAS                   | 0.24             | 0.16             | 0.27           | -0.12           |

Values are Pearson's correlation.

**Appendix Table 4.** Correlation of central sensitization index (CSI) among acupoints.

|                  | CSI             |                  |                |                 |
|------------------|-----------------|------------------|----------------|-----------------|
|                  | Tianzong (SI11) | Jianliao (SJ 14) | Jianyu (LI 15) | Jianzhen (SI 9) |
| Tianzong (SI11)  | 1.00            | 0.09             | 0.11           | 0.17            |
| Jianliao (SJ 14) | 0.09            | 1.00             | 0.59*          | 0.25            |
| Jianyu (LI 15)   | 0.11            | 0.59*            | 1.00           | 0.51*           |
| Jianzhen (SI 9)  | 0.17            | 0.25             | 0.51*          | 1.00            |

Values are Pearson's correlation. \*Significant association between variables ( $p < 0.01$ ).

**Appendix Table 5.** Correlation between central sensitization index (CSI) and relevant baseline characteristics.

|                       | CSI              |                  |                |                 |
|-----------------------|------------------|------------------|----------------|-----------------|
|                       | Tianzong (SI 11) | Jianliao (SJ 14) | Jianyu (LI 15) | Jianzhen (SI 9) |
| Age (years)           | -0.10            | -0.12            | -0.32          | -0.24           |
| Pain duration (weeks) | 0.13             | 0.29             | -0.16          | -0.05           |
| VAS                   | 0.33             | 0.21             | 0.04           | 0.01            |

Values are Pearson's correlation.

**Appendix Table 6.** Correlation between peripheral sensitization index (PSI) and central sensitization index (CSI).

|                  | CSI             |                  |                |                 |
|------------------|-----------------|------------------|----------------|-----------------|
|                  | Tianzong (SI11) | Jianliao (SJ 14) | Jianyu (LI 15) | Jianzhen (SI 9) |
| <b>PSI</b>       |                 |                  |                |                 |
| Tianzong (SI11)  | 0.48*           | 0.15             | 0.40*          | 0.52*           |
| Jianliao (SJ 14) | 0.17            | 0.39*            | 0.58*          | 0.62*           |
| Jianyu (LI 15)   | 0.32            | 0.36             | 0.53*          | 0.58*           |
| Jianzhen (SI 9)  | 0.17            | 0.25             | 0.65*          | 0.58*           |

Values are Pearson's correlation. \*Significant association between variables ( $p < 0.05$ ).

1  
2  
3  
4  
5  
6  
7  
8  
9  
10  
11  
12  
13  
14  
15  
16  
17  
18  
19  
20  
21  
22  
23  
24  
25  
26  
27  
28  
29  
30  
31  
32  
33  
34  
35  
36  
37  
38  
39  
40  
41  
42  
43  
44  
45  
46  
47  
48  
49  
50  
51  
52  
53  
54  
55  
56  
57  
58  
59  
60STROBE Statement—Checklist of items that should be included in reports of *case-control studies*

|                              | Item No    | Recommendation                                                                                                                                                                                                                                                                                                                                                     |
|------------------------------|------------|--------------------------------------------------------------------------------------------------------------------------------------------------------------------------------------------------------------------------------------------------------------------------------------------------------------------------------------------------------------------|
| <b>Title and abstract</b>    | 1 (P1-2)   | (a) Indicate the study's design with a commonly used term in the title or the abstract<br>(b) Provide in the abstract an informative and balanced summary of what was done and what was found                                                                                                                                                                      |
| <b>Introduction</b>          |            |                                                                                                                                                                                                                                                                                                                                                                    |
| Background/rationale         | 2 (P4)     | Explain the scientific background and rationale for the investigation being reported                                                                                                                                                                                                                                                                               |
| Objectives                   | 3 (P4)     | State specific objectives, including any prespecified hypotheses                                                                                                                                                                                                                                                                                                   |
| <b>Methods</b>               |            |                                                                                                                                                                                                                                                                                                                                                                    |
| Study design                 | 4 (P4)     | Present key elements of study design early in the paper                                                                                                                                                                                                                                                                                                            |
| Setting                      | 5 (P5-7)   | Describe the setting, locations, and relevant dates, including periods of recruitment, exposure, follow-up, and data collection                                                                                                                                                                                                                                    |
| Participants                 | 6          | (a) Give the eligibility criteria, and the sources and methods of case ascertainment and control selection. Give the rationale for the choice of cases and controls (P5)<br>(b) For matched studies, give matching criteria and the number of controls per case (P5-6)                                                                                             |
| Variables                    | 7 (P6-7)   | Clearly define all outcomes, exposures, predictors, potential confounders, and effect modifiers. Give diagnostic criteria, if applicable                                                                                                                                                                                                                           |
| Data sources/<br>measurement | 8* (P6-7)  | For each variable of interest, give sources of data and details of methods of assessment (measurement). Describe comparability of assessment methods if there is more than one group                                                                                                                                                                               |
| Bias                         | 9 (P7)     | Describe any efforts to address potential sources of bias                                                                                                                                                                                                                                                                                                          |
| Study size                   | 10 (P5)    | Explain how the study size was arrived at                                                                                                                                                                                                                                                                                                                          |
| Quantitative variables       | 11 (P7)    | Explain how quantitative variables were handled in the analyses. If applicable, describe which groupings were chosen and why                                                                                                                                                                                                                                       |
| Statistical methods          | 12         | (a) Describe all statistical methods, including those used to control for confounding (P7)<br>(b) Describe any methods used to examine subgroups and interactions (P8)<br>(c) Explain how missing data were addressed (NONE)<br>(d) If applicable, explain how matching of cases and controls was addressed (NONE)<br>(e) Describe any sensitivity analyses (NONE) |
| <b>Results</b>               |            |                                                                                                                                                                                                                                                                                                                                                                    |
| Participants                 | 13*        | (a) Report numbers of individuals at each stage of study—eg numbers potentially eligible, examined for eligibility, confirmed eligible, included in the study, completing follow-up, and analysed (P8)<br>(b) Give reasons for non-participation at each stage (NONE)<br>(c) Consider use of a flow diagram (NONE)                                                 |
| Descriptive data             | 14*        | (a) Give characteristics of study participants (eg demographic, clinical, social) and information on exposures and potential confounders (P8)<br>(b) Indicate number of participants with missing data for each variable of interest (NONE)                                                                                                                        |
| Outcome data                 | 15* (NONE) | Report numbers in each exposure category, or summary measures of exposure                                                                                                                                                                                                                                                                                          |

|                                                                                                                                                                            |                          |                    |                                                                                                                                                                                                                                                                                                                                                                                                                                                          |
|----------------------------------------------------------------------------------------------------------------------------------------------------------------------------|--------------------------|--------------------|----------------------------------------------------------------------------------------------------------------------------------------------------------------------------------------------------------------------------------------------------------------------------------------------------------------------------------------------------------------------------------------------------------------------------------------------------------|
| 1<br>2<br>3<br>4<br>5<br>6<br>7<br>8<br>9<br>10<br>11                                                                                                                      | Main results             | 16                 | (a) Give unadjusted estimates and, if applicable, confounder-adjusted estimates and their precision (eg, 95% confidence interval). Make clear which confounders were adjusted for and why they were included <b>(P9-11)</b><br>(b) Report category boundaries when continuous variables were categorized <b>(NONE)</b><br>(c) If relevant, consider translating estimates of relative risk into absolute risk for a meaningful time period <b>(NONE)</b> |
| 12<br>13<br>14<br>15                                                                                                                                                       | Other analyses           | 17 <b>(P8)</b>     | Report other analyses done—eg analyses of subgroups and interactions, and sensitivity analyses                                                                                                                                                                                                                                                                                                                                                           |
| 16                                                                                                                                                                         | <b>Discussion</b>        |                    |                                                                                                                                                                                                                                                                                                                                                                                                                                                          |
| 17<br>18                                                                                                                                                                   | Key results              | 18 <b>(P14)</b>    | Summarise key results with reference to study objectives                                                                                                                                                                                                                                                                                                                                                                                                 |
| 19<br>20<br>21<br>22<br>23<br>24                                                                                                                                           | Limitations              | 19 <b>(P16-17)</b> | Discuss limitations of the study, taking into account sources of potential bias or imprecision. Discuss both direction and magnitude of any potential bias                                                                                                                                                                                                                                                                                               |
| 25<br>26<br>27                                                                                                                                                             | Interpretation           | 20 <b>(P14-16)</b> | Give a cautious overall interpretation of results considering objectives, limitations, multiplicity of analyses, results from similar studies, and other relevant evidence                                                                                                                                                                                                                                                                               |
| 28<br>29<br>30                                                                                                                                                             | Generalisability         | 21 <b>(P3)</b>     | Discuss the generalisability (external validity) of the study results                                                                                                                                                                                                                                                                                                                                                                                    |
| 31                                                                                                                                                                         | <b>Other information</b> |                    |                                                                                                                                                                                                                                                                                                                                                                                                                                                          |
| 32<br>33<br>34<br>35<br>36<br>37<br>38<br>39<br>40<br>41<br>42<br>43<br>44<br>45<br>46<br>47<br>48<br>49<br>50<br>51<br>52<br>53<br>54<br>55<br>56<br>57<br>58<br>59<br>60 | Funding                  | 22 <b>(P18)</b>    | Give the source of funding and the role of the funders for the present study and, if applicable, for the original study on which the present article is based                                                                                                                                                                                                                                                                                            |

\*Give information separately for cases and controls.

**Note:** An Explanation and Elaboration article discusses each checklist item and gives methodological background and published examples of transparent reporting. The STROBE checklist is best used in conjunction with this article (freely available on the Web sites of PLoS Medicine at <http://www.plosmedicine.org/>, Annals of Internal Medicine at <http://www.annals.org/>, and Epidemiology at <http://www.epidem.com/>). Information on the STROBE Initiative is available at <http://www.strobe-statement.org>.

# BMJ Open

## Detection for peripheral and central sensitization at acupoints in patients with unilateral shoulder pain in Beijing: a cross-sectional matched case-control study

|                                 |                                                                                                                                                                                                                                                                                                                                                                                                                                                                                                                                                                                                                                                                                                                                                                                                                                                                                                                                                                                                                    |
|---------------------------------|--------------------------------------------------------------------------------------------------------------------------------------------------------------------------------------------------------------------------------------------------------------------------------------------------------------------------------------------------------------------------------------------------------------------------------------------------------------------------------------------------------------------------------------------------------------------------------------------------------------------------------------------------------------------------------------------------------------------------------------------------------------------------------------------------------------------------------------------------------------------------------------------------------------------------------------------------------------------------------------------------------------------|
| Journal:                        | <i>BMJ Open</i>                                                                                                                                                                                                                                                                                                                                                                                                                                                                                                                                                                                                                                                                                                                                                                                                                                                                                                                                                                                                    |
| Manuscript ID                   | bmjopen-2016-014438.R3                                                                                                                                                                                                                                                                                                                                                                                                                                                                                                                                                                                                                                                                                                                                                                                                                                                                                                                                                                                             |
| Article Type:                   | Research                                                                                                                                                                                                                                                                                                                                                                                                                                                                                                                                                                                                                                                                                                                                                                                                                                                                                                                                                                                                           |
| Date Submitted by the Author:   | 10-Apr-2017                                                                                                                                                                                                                                                                                                                                                                                                                                                                                                                                                                                                                                                                                                                                                                                                                                                                                                                                                                                                        |
| Complete List of Authors:       | Yan, Chao-qun; Beijing Hospital of Traditional Chinese Medicine affiliated to Capital Medical University, Acupuncture and Moxibustion Department beijing, CN<br>Zhang, Shuai; Beijing Hospital of Traditional Chinese Medicine affiliated to Capital Medical University, Acupuncture and Moxibustion Department<br>Li, Qian-Qian; Beijing Hospital of Traditional Chinese Medicine affiliated to Capital Medical University,<br>Zhang, Liwen; Shandong University of Traditional Chinese Medicine<br>Wang, Xue-Rui; Beijing Hospital of Traditional Chinese Medicine affiliated to Capital Medical University, Acupuncture and Moxibustion Department<br>Fu, Qing-Nan; Beijing Hospital of Traditional Chinese Medicine affiliated to Capital Medical University,<br>Shi, Guangxia; Beijing Hospital of Traditional Chinese Medicine affiliated to Capital Medical University, Acupuncture and Moxibustion Department<br>LIU, Cunzhi; Beijing Hospital of Traditional Chinese Medicine , Department of acupuncture |
| <b>Primary Subject Heading</b>: | Complementary medicine                                                                                                                                                                                                                                                                                                                                                                                                                                                                                                                                                                                                                                                                                                                                                                                                                                                                                                                                                                                             |
| Secondary Subject Heading:      | Rehabilitation medicine                                                                                                                                                                                                                                                                                                                                                                                                                                                                                                                                                                                                                                                                                                                                                                                                                                                                                                                                                                                            |
| Keywords:                       | acupoints, peripheral sensitization, central sensitization, pressure pain threshold, shoulder pain                                                                                                                                                                                                                                                                                                                                                                                                                                                                                                                                                                                                                                                                                                                                                                                                                                                                                                                 |
|                                 |                                                                                                                                                                                                                                                                                                                                                                                                                                                                                                                                                                                                                                                                                                                                                                                                                                                                                                                                                                                                                    |

SCHOLARONE™  
Manuscripts

1  
2  
3 **Detection for peripheral and central sensitization at acupoints in patients**  
4  
5  
6 **with unilateral shoulder pain in Beijing: a cross-sectional matched case-**  
7  
8 **control study**  
9

10  
11 Chao-Qun Yan, Shuai Zhang, Qian-Qian Li, Li-Wen Zhang, Xue-Rui Wang, Qing-Nan Fu, Guang-  
12  
13 Xia Shi, Cun-Zhi Liu \*

14  
15  
16 Acupuncture and Moxibustion Department, Beijing Hospital of Traditional Chinese Medicine  
17  
18 Affiliated to Capital Medical University, 23 Meishuguanhou Street, Dongcheng District, Beijing  
19  
20 100010, China.

21  
22 \*Corresponding author at: Acupuncture and Moxibustion Department, Beijing Hospital of  
23  
24 Traditional Chinese Medicine Affiliated to Capital Medical University, 23 Meishuguanhou  
25  
26 Street, Dongcheng District, Beijing 100010, China. Tel: 0086-010-52176043; Fax: 0086-010-  
27  
28 52176813.

29  
30 E-mail address: [lcz623780@126.com](mailto:lcz623780@126.com)

31  
32 Word count: 4423  
33  
34  
35  
36  
37  
38  
39  
40  
41  
42  
43  
44  
45  
46  
47  
48  
49  
50  
51  
52  
53  
54  
55  
56  
57  
58  
59  
60

## Abstract

**Objective**—To investigate the pattern of experimental pain responses at acupoints in patients with unilateral shoulder pain.

**Design**— A cross-sectional matched case-control study.

**Setting**—Acupuncture and Moxibustion Department, Beijing Hospital of Traditional Chinese Medicine Affiliated to Capital Medical University.

**Participants**—Volunteer sample of 60 participants (30 patients with unilateral shoulder pain, 30 healthy controls).

**Interventions**—Not applicable.

**Main Outcome Measures**—Pressure pain thresholds (PPTs) were measured at four acupoints, including Tianzong (SI 11), Jianliao (SJ 14), Jianyu (LI 15) and Jianzhen (SI 9) on the painful/non-painful side in patients with unilateral shoulder pain or healthy controls, respectively. The correlations between peripheral sensitization index (PSI) and central sensitization index (CSI) were compared in this study.

**Results**—The analysis revealed significantly lower PPT values at acupoints on the painful side compared with non-painful side in patients with shoulder pain ( $P < 0.025$ ). Meanwhile, PPTs on the non-painful side of these patients were lower than the ipsilateral side of healthy controls ( $P < 0.025$ ). No distinct differences of PPT values were found at non-acupoint among the painful/non-painful side in patients with shoulder pain and the ipsilateral side of healthy controls ( $P > 0.05$ ). Additionally, it was observed that the pressure pain assessment acupoints have strong association between the PSI and CSI, and three acupoints of SJ 14, LI 15 and SI 9 showed correlation in PSI or CSI particularly.

**Conclusion**—The results suggest the presence of peripheral and central sensitization at acupoints in participants with unilateral shoulder pain. There exists an obvious relationship among the three acupoints of SJ 14, LI 15 and SI 9, which are usually chosen to treat shoulder pain. The results provide the evidence for acupoints selection to treat shoulder pain by acupuncture.



1  
2  
3 **Keywords:** acupoints; peripheral sensitization; central sensitization; pressure pain threshold;  
4 shoulder pain  
5

6  
7 **Strengths and limitations of this study**  
8

9  
10 This is, to our knowledge, the first study to support an alteration in both peripheral and central  
11 sensitization at acupoints in patients with shoulder pain.  
12

13  
14 The internal validity is increased by blinding the evaluator and participants.  
15

16 A limitation of this study is that only pressure pain assessment was performed at acupoints,  
17 which might be inadequate to describe the complexity of pain perception.  
18

19  
20 This study was conducted in a single institution and consisted of a primarily female sample, so  
21 the external validity is not clear.  
22  
23

24 **INTRODUCTION**  
25

26  
27 Acupuncture is one of the most widely-used forms of complementary and alternative  
28 medicines. There are approximately 183 countries using acupuncture treatment according to a  
29 survey conducted by the World Federation of Acupuncture and Moxibustion Societies in 2013  
30 [1]. The WHO reports that acupuncture treatment can be beneficial for more than 40 disorders  
31 [2]. Pain is one of those disorders, which is particularly amenable to acupuncture. The evidence  
32 in reviews demonstrates that acupuncture treatment can reduce various types of clinical pain  
33 effectively in multiple clinical trials [3-5]. Recently, a meta-analysis reported that shoulder pain,  
34 low back pain, neck pain, osteoarthritis and chronic headache can be alleviated significantly after  
35 acupuncture treatment [6]. Shoulder pain is the third most common musculoskeletal disorder, of  
36 which the prevalence rate varies from 6.9% to 26% for point prevalence and even increases to  
37 66.7% for lifetime prevalence in a general population [7, 8]. In our previous study, we identified  
38 acupuncture treatment can alleviate shoulder pain, particularly in special acupoints (data  
39 unpublished).  
40  
41

42  
43 Acupoints are special sites at precise locations and lie on ‘meridians’ without a physical  
44 structure. According to the theory of meridians in Traditional Chinese Medicine, it is well known  
45 that the acupoints reflect disorders of visceral conditions. Many studies have observed visceral  
46 lesions result in changed pain perception of some special acupoints on the body surface [9]. Ben  
47  
48  
49  
50  
51  
52  
53  
54  
55  
56  
57  
58  
59  
60

1  
2  
3 et al assessed the phenomenon of experimental pain-sensitive points in patients with gastric ulcer  
4 or gastritis and found some special acupoints were more sensitive than other areas [10].  
5 Nevertheless, whether acupoints behave more sensitively under musculoskeletal pain has not  
6 been described in detail in previous studies.  
7  
8  
9

10 Sensitization is a nervous system phenomenon that can occur in conjunction with pain [11].  
11 When sensitization is present, there are two types of hypersensitivity including peripheral  
12 sensitization and central sensitization, which are important mechanisms in musculoskeletal pain  
13 conditions [12]. Peripheral sensitization is defined as the broadening of nociception in pain  
14 perception during activities or movements, which typically would be not painful [11]. Central  
15 sensitization refers to an amplification of neural signaling within the central nervous system that  
16 elicits pain hypersensitivity. It reflects increased activity of pain facilitation pathways and  
17 malfunctioning of descending pain inhibitory pathways [13-17].  
18  
19  
20  
21  
22  
23  
24

25 We performed a multicenter, single blind, factorial randomized controlled clinical trial  
26 previously (Number Register: ISRCTN61861069). In the study, we found the phenomenon that  
27 the pain threshold decreased at related acupoints in patients with unilateral shoulder pain was  
28 widespread. Therefore, we chose some patients from the trial to detect whether acupoints are  
29 hypersensitive in musculoskeletal pain disease. We hypothesized that the patients with unilateral  
30 shoulder pain would present peripheral or central sensitization at acupoints as evidenced by  
31 Pressure pain threshold (PPT) detection, when compared with healthy controls. Specifically,  
32 acupoints on the painful side would have lower PPT than on the non-painful side of patients.  
33 Also, acupoints on the non-painful side of patients would be hypersensitive as assessed by PPTs,  
34 with respect to the ipsilateral side of healthy controls. If the results confirm these hypotheses,  
35 then it provides evidence that acupoints exist for peripheral sensitization and central sensitization  
36 phenomenon in patients with unilateral shoulder pain.  
37  
38  
39  
40  
41  
42  
43  
44  
45

## 46 **METHODS AND ANALYSIS**

### 47 **Study design**

48  
49  
50 This cross-sectional matched case-control study was conducted at the Department of  
51 Acupuncture and Moxibustion, Beijing Hospital of Traditional Chinese Medicine Affiliated to  
52 Capital Medical University.  
53  
54  
55  
56  
57  
58  
59  
60

## Participants

Clinical patients—The 30 patients with shoulder pain were chosen from a multicenter, randomized trial. In total, 164 patients with shoulder pain were recruited from three centers in the random trial between January 2014 and September 2014. We enrolled the final 30 patients from 76 patients that screened in the center of Beijing Hospital of Traditional Chinese Medicine before any treatments were dispensed. The Research Ethical Committee of Beijing Hospital of Traditional Chinese Medicine Affiliated to Capital Medical University approved the trial (reference: 201315).

The inclusion criteria included presenting with unilateral shoulder pain for at least six weeks and up to two years, reporting the pain intensity  $> 50$  mm on a visual analogue scale (VAS), and being right hand dominant, who have not received acupuncture or other analgesic therapies in the preceding month.

The exclusion criteria were as follows: pain in both shoulders; referred pain from the cervical spine; previous history of shoulder surgery, pectorial muscle pain, thoracic outlet syndrome, stroke or ipsilateral breast surgery; heart diseases and severe hypertension; osteoarthritis of the glenohumeral joint or systemic bone and joint disorder (rheumatoid arthritis); endocrine diseases such as hyperthyroidism; severe infection; undergoing current therapy involving analgesics and especially major illness depression.

Healthy controls—The healthy controls were matched to the patients with shoulder pain individually. Each healthy control was matched for gender, age ( $\pm 1$  year), ethnicity and dominant hand to one patient. Healthy controls were recruited from the community via posted flyers and general advertisements between May 2014 and September 2014. Healthy controls were eligible if they were not currently performing resistance exercise for the upper extremity. They were excluded based on the following criteria: receiving acupuncture or other analgesic therapies in the preceding month, experiencing neck or shoulder pain, having a history of shoulder surgery or neurological impairments of the upper extremity, a shoulder skin infection, having difficulty in understanding instructions, and taking any pain medication currently.

## Protocol

1  
2  
3 All participants completed a packet of questionnaires including demographic data (age, sex,  
4 race, dominant hand) and psychological information before informed consent was obtained. The  
5 patients were initially examined by a researcher who assessed compliance using the inclusion  
6 and exclusion criteria. Beck Depression Inventory (BDI) is a multiple choice self-reported  
7 inventory for measuring the severity of depression [18]. If the BDI outcome is more than 4, the  
8 participants were excluded [19]. Clinical pain intensity was assessed by VAS, which consists a  
9 line of 0–100 mm: 0 representing ‘no pain at all’ and 100 mm representing ‘the most intense pain  
10 imaginable’.  
11  
12  
13  
14  
15  
16

17 After finishing the questionnaires, both shoulders of participants were exposed and the  
18 measurement sites were marked. The participants were not been told which site was non-  
19 acupoint. An expert acupuncturist was responsible for the operation. Five points were marked in  
20 this study and shown in Figure 1 and Appendix Table 1. To assess the pain sensitivity of  
21 acupoints, four acupoints Jianliao (SJ 14), Jianyu (LI 15), Jianzhen (SI 9), and Tianzong (SI 11)  
22 were marked bilaterally with a marker pen drawing a circle (Figure 1. A. B). To assess the pain  
23 sensitivity in the non-acupoint, 2 cm down to Tianzong (SI 11) was marked bilaterally in  
24 participants (Figure 1. B).  
25  
26  
27  
28  
29  
30  
31

### 32 **Measurement of pressure pain thresholds (PPT)**

33

34 Both shoulders were exposed for examination by an operator. The participants were asked to  
35 take a prone position on the examination bed with a suitable pillow under the chest when  
36 Jianzhen (SI 9), Tianzong (SI 11) and non-acupoint were measured. Then the participants were  
37 required to sit on a chair with a researcher to keep the arm and shoulder in parallel when Jianliao  
38 (SJ 14) and Jianyu (LI 15) were measured.  
39  
40  
41  
42  
43

44 PPT is widely used to evaluate the pain sensory threshold for the patients with shoulder pain  
45 [20]. The lower value of PPT indicates the decreased nociceptive threshold of pain perception  
46 [21]. A handheld electronic pressure algometer (Wagner Instruments, Greenwich, CT) mounted  
47 with a 1 cm<sup>2</sup> rubber tipped plunger was used in this study. The probe was held perpendicular to  
48 marked points bilaterally, and the pressure was increased at a rate of 30kPa/s, in order to avoid  
49 potential skin penetration. All participants were instructed to indicate when the pressure became  
50 painful, at that time the pressure was immediately stopped and the digits were recorded. PPT was  
51 calculated as the mean of three trials on each point. There was an approximately 2 min interval  
52  
53  
54  
55  
56  
57  
58  
59  
60

1  
2  
3 between the repetitions. The operator was not to be told which side is the painful shoulder of  
4 patients and blinded to patients and healthy controls. Additionally, the operator did not have any  
5 basic knowledge of acupoints and did not know whether the measuring sites were acupoints or  
6 not during testing.  
7  
8  
9

## 10 **Data Analysis**

11  
12  
13 The data were double entered with an adequate check in EpiData. SPSS 17.0 software (SPSS  
14 Inc., Chicago, IL, USA) was used for analysis. Discrete variables were summarized by  
15 frequencies and percentages. Distributed data were summarized using mean  $\pm$  standard deviation  
16 (SD) or median and interquartile range (IQR). The distributed data were analyzed using a  
17 parametric statistical test (Pair t-test) if it agreed with normal distribution. Otherwise, the data  
18 were analyzed using a non-parametric (Wilcoxon's signed rank test) statistical test. Shapiro-Wilk  
19 test and observation of histograms and normal probability plots were used for all study variables  
20 to determine whether they followed a normal distribution. To adjust multiple comparisons, an  
21 alpha level of 0.025 was used for all pairwise comparisons.  
22  
23  
24  
25  
26  
27  
28

29  
30  
31  
32  
33  
34  
35  
36  
37  
38  
39  
40  
41  
42  
43  
44  
45  
46  
47  
48  
49  
50  
51  
52  
53  
54  
55  
56  
57  
58  
59  
60  
Peripheral and central sensitization index was used to determine whether pain-sensitivity  
existed at the pressure pain assessment sites. Peripheral sensitization is referred to a patient's  
response for PPT on the painful side that fell below the 25<sup>th</sup> percentile among the non-painful  
side [22]. The PPT value of the 25<sup>th</sup> percentile is determined by the average value of 7<sup>th</sup> and 8<sup>th</sup>  
lowest observations on the non-painful side. We examined a patient's proportional response for  
PPT on the painful side fell below the 25<sup>th</sup> percentile. Each response PPT is considered for  
peripheral sensitization index (PSI). Central sensitization indicates that a patient's response for  
PPT on the non-painful side fell below the 25<sup>th</sup> percentile (the average value of 7<sup>th</sup> and 8<sup>th</sup> lowest  
observations) among the ipsilateral side of healthy controls. We computed the proportional  
responses for PPT on the non-painful side fell below the 25<sup>th</sup> percentile among the ipsilateral side  
of healthy controls. Each response PPT is considered for central sensitization index (CSI). The  
25<sup>th</sup> percentile was suggested as a lower limit reference value for enhanced sensitivity [23]. Each  
index was examined by Pearson's correlation. We determine whether patients with shoulder pain  
demonstrated peripheral, central, a mixed-pattern or no sensitization, and analyzed the  
association between sensitization subgroups and the relevant baseline characteristics including  
demographic and clinical variables. We analyzed association between sensitization subgroups

and the relevant baseline characteristics including demographic and clinical variables. Comparisons among the variables were examined using one way analysis of variance or Chi-square and assessment of 95% confidence intervals (CI). A *P* value <0.05 was defined as statistically significant.

## RESULTS

### Recruitment and baseline characteristics

Between January 2014 and September 2014, thirty patients with shoulder pain (11 males and 19 females) were enrolled in this study. The average age of the thirty patients was  $50.60 \pm 12.19$  years (Table 1). The healthy controls included 11 males and 19 females with a mean age of  $50.63 \pm 12.20$  years. All participants were right hand dominant.

**Table. 1** Characteristics of the patients with shoulder pain and healthy controls.

|                             | Patients With Shoulder Pain (N = 30) | Healthy Controls (N = 30) |
|-----------------------------|--------------------------------------|---------------------------|
| Age (years)                 | $50.60 \pm 12.19$                    | $50.63 \pm 12.20$         |
| Sex (females), n (%)        | 19 (63.33)                           | 19 (63.33)                |
| Race (number of Han), n (%) | 30 (100)                             | 30 (100)                  |
| Pain duration (weeks)       | $19.07 \pm 16.99$                    | -                         |
| VAS (median, IQR)           | 70 (50 - 80)                         | -                         |
| BDI (median, IQR)           | 0 (0 - 0)                            | 0 (0 - 0)                 |
| BMI                         | $25.27 \pm 4.17$                     | $24.91 \pm 3.77$          |
| Normal ( $\leq 23.9$ )      | 11                                   | 12                        |
| Overweight (24 - 27.9)      | 12                                   | 14                        |
| Obese ( $\geq 28$ )         | 7                                    | 4                         |

Values represented as N, mean  $\pm$  SD or median, IQR.

Abbreviations: N – Number, SD – standard deviation, VAS – Visual Analogue Scale, BDI– Beck Depression Inventory, BMI – Body Mass Index, IQR – interquartile range.

### PPT comparison of related acupoints

For the patients with shoulder pain, lower PPT levels were detected at acupoints on the painful side compared with the non-painful side (Table 2). The differences were 94.9 (95% CI, 53.47 to 136.33; *p* < 0.001) at Tianzong (SI 11), 102.91 (95% CI, 79.85 to 125.97; *p* < 0.001) at Jianliao

1  
2  
3 (SJ 14), 91.19 (95% CI, 44.82 to 137.56;  $p < 0.001$ ) at Jianyu (LI 15), and 86.79 (95% CI, 56.30  
4 to 117.28;  $p < 0.001$ ) at Jianzhen (SI 9), respectively.  
5  
6

7 The PPT value difference between the non-painful side of the patients and the ipsilateral side  
8 of healthy controls was also compared. PPTs at the acupoints on non-painful side of the patients  
9 were lower than on the ipsilateral side of healthy controls. The differences were 57.71 (95% CI,  
10 24.72 to 90.70;  $p = 0.001$ ) at Tianzong (SI 11), 81.03 (95% CI, 41.40 to 120.67;  $p < 0.001$ ) at  
11 Jianliao (SJ 14), 72.20 (95% CI, 10.90 to 133.50;  $p = 0.02$ ) at Jianyu (LI 15), and 88.09 (95% CI,  
12 39.88 to 136.30;  $p = 0.001$ ) at Jianzhen (SI 9), respectively.  
13  
14  
15  
16  
17  
18  
19  
20  
21  
22  
23  
24  
25  
26  
27  
28  
29  
30  
31  
32  
33  
34  
35  
36  
37  
38  
39  
40  
41  
42  
43  
44  
45  
46  
47  
48  
49  
50  
51  
52  
53  
54  
55  
56  
57  
58  
59  
60

**Table 2** Pressure pain threshold values for participants

|                  | Patients With Shoulder Pain |                  | Painful vs Non-painful Side |         | Health Controls  | Non-painful Side vs Ipsilateral Side |         |
|------------------|-----------------------------|------------------|-----------------------------|---------|------------------|--------------------------------------|---------|
|                  | Painful Side                | Non-painful Side | Mean (95% CI)               | P value | Ipsilateral Side | Mean (95% CI)                        | P value |
| Tianzong (SI 11) | 414.83 ± 135.61             | 509.73 ± 168.05  | 94.90 (53.47, 136.33)       | <0.001  | 567.44 ± 153.84  | 57.71 (24.72, 90.70)                 | 0.001   |
| Jianliao (SJ 14) | 469.70 ± 181.07             | 572.61 ± 196.71  | 102.91 (79.85, 125.97)      | <0.001  | 653.64 ± 211.50  | 81.03 (41.40, 120.67)                | <0.001  |
| Jianyu (LI 15)   | 434.79 ± 140.39             | 525.98 ± 160.16  | 91.19 (44.82, 137.56)       | <0.001  | 598.18 ± 181.76  | 72.20 (10.90, 133.50)                | 0.02    |
| Jianzhen (SI 9)  | 453.08 ± 154.54             | 539.87 ± 167.59  | 86.79 (56.30, 117.28)       | <0.001  | 627.96 ± 209.67  | 88.09 (39.88, 136.30)                | 0.001   |
| Non-acupoints    | 521.34 ± 147.02             | 538.67 ± 153.89  | 17.33 (-36.99, 2.34)        | 0.08    | 549.18 ± 143.66  | 10.51 (-18.87, 39.89)                | 0.47    |

Values represented as mean ± SD. The unit of values was Kpa. Abbreviations: SD – Standard Deviation, CI –Confidence Intervals.



### PPT comparison of non-acupoint

Figure 2 showed PPT at the non-acupoint. For the patients, the analysis revealed no obvious difference of 17.33 (95% CI, -36.99 to 2.34;  $p = 0.08$ ) in PPT value on the painful side compared to the non-painful side. Meanwhile, no significant difference of PPT level, which behaved 10.51 (95% CI, -18.87 to 39.89;  $p = 0.47$ ), was found between the non-painful side of the patients and the ipsilateral side of healthy controls.

### Peripheral Sensitization Index

All measured acupoints demonstrated side-to-side difference in the patients. They were used to compute a peripheral sensitization index (PSI). PPT values at acupoints on the painful side below the 25<sup>th</sup> percentile of the non-painful side indicated peripheral sensitization. The proportion of the patients with peripheral sensitization were 77% at Tianzong (SI 11), 37% at Jianliao (SJ 14), 43% at Jianyu (LI 15) and 60% at Jianzhen (SI 9) (Table 3). Significant correlation (Appendix Table 2) was observed in PSI among Jianliao (SJ 14), Jianyu (LI 15) and Jianzhen (SI 9) ( $p < 0.01$ ). There was no significant association between PSI and other baseline variables ( $p > 0.05$ ) (Appendix Table 3).

**Table 3.** Frequencies meeting the peripheral sensitization index (PSI) and central sensitization index (CSI) based on PPT response.

| Sites            | PSI     | CSI     | PSI×CSI |
|------------------|---------|---------|---------|
| Tianzong (SI11)  | 23 (77) | 13 (43) | 13 (43) |
| Jianliao (SJ 14) | 11 (37) | 17 (57) | 9 (30)  |
| Jianyu (LI 15)   | 13 (43) | 19 (63) | 12 (40) |
| Jianzhen (SI 9)  | 18 (60) | 18 (60) | 15 (50) |

Values are individual counts (percentages). Abbreviations: PPT – Pressure-pain threshold.

### Central Sensitization Index

The four measured acupoints demonstrated difference between the non-painful side of patients and the ipsilateral side of healthy controls. Therefore, they were used to compute central sensitization index (CSI). The proportion of the patients were 43% at Tianzong (SI 11), 57% at

1  
2  
3 Jianliao (SJ 14), 63% at Jianyu (LI 15) and 60% at Jianzhen (SI 9) (Table 3). A distinct and  
4 significant association (Appendix Table 4) was observed between Jianliao (SJ 14) and Jianyu (LI  
5 15) ( $p < 0.01$ ), Jianyu (LI 15) and Jianzhen (SI 9) ( $p < 0.01$ ) in CSI. Appendix Table 5 showed  
6 no statistical significance correlations between CSI and relevant baseline characteristics ( $p >$   
7 0.05).  
8  
9  
10  
11

### 12 **Comparison of Peripheral and Central Sensitization Index**

13  
14  
15 The frequencies of the patients who had both PSI and CSI were 43% at Tianzong (SI 11), 30%  
16 at Jianliao (SJ 14), 40% at Jianyu (LI 15) and 50% at Jianzhen (SI 9), respectively (Table 3).  
17 Significant correlation was observed between PSI and CSI in measured acupoints ( $p < 0.05$ )  
18 (Appendix Table 6). Table 4 showed that association between subgroups and sex approached  
19 statistical significance at the assessment acupoints ( $p < 0.001$ ). No significant association was  
20 observed between subgroups and other baseline variable ( $p > 0.05$ ).  
21  
22  
23  
24  
25  
26  
27  
28  
29  
30  
31  
32  
33  
34  
35  
36  
37  
38  
39  
40  
41  
42  
43  
44  
45  
46  
47  
48  
49  
50  
51  
52  
53  
54  
55  
56  
57  
58  
59  
60

**Table 4** Demographic, clinical, and psychological characteristics of sensitization groups.

|                         | Peripheral Sensitization | Central Sensitization | Peripheral and Central Sensitization | No Sensitization     | P value |
|-------------------------|--------------------------|-----------------------|--------------------------------------|----------------------|---------|
| <b>Tianzong (SI11)</b>  |                          |                       |                                      |                      |         |
| Age (years)             | 48.78 (43.45, 54.21)     | 50.38 (44.02, 56.75)  | 50.38 (44.02, 56.75)                 | 56.57 (48.00, 65.15) | 0.47    |
| Sex (%females)          | 78.28 (56.14, 92.52)     | 76.92 (46.16, 94.89)  | 76.92 (46.16, 94.89)                 | 14.29 (3.68, 57.62)  | <0.001  |
| Pain duration (weeks)   | 21.04 (12.91, 29.17)     | 24.31 (10.23, 38.38)  | 24.31 (10.23, 38.38)                 | 12.57 (7.16, 17.99)  | 0.60    |
| VAS                     | 68.04 (61.25, 74.84)     | 71.15 (62.77, 79.53)  | 71.15 (62.77, 79.53)                 | 60.00 (52.45, 67.55) | 0.34    |
| <b>Jianliao (SJ 14)</b> |                          |                       |                                      |                      |         |
| Age (years)             | 48.09 (38.47, 57.71)     | 49.59 (43.35, 55.82)  | 48.89 (38.97, 58.81)                 | 53.27 (46.22, 60.33) | 0.78    |
| Sex (%females)          | 100                      | 82.35 (56.42, 96.62)  | 100                                  | 27.27 (6.01, 60.95)  | <0.001  |
| Pain duration (weeks)   | 22.55 (10.81, 34.28)     | 23.29 (12.80, 33.79)  | 22.22 (7.96, 36.49)                  | 11.64 (7.07, 16.21)  | 0.32    |
| VAS                     | 70.00 (59.17, 80.83)     | 68.82 (61.14, 76.51)  | 72.22 (59.60, 84.84)                 | 63.18 (53.41, 72.95) | 0.59    |
| <b>Jianyu (LI 15)</b>   |                          |                       |                                      |                      |         |
| Age (years)             | 46.92 (38.29, 55.56)     | 47.47 (41.20, 53.75)  | 45.42 (36.64, 54.19)                 | 55.10 (48.95, 61.25) | 0.32    |
| Sex (%females)          | 92.31 (63.76, 99.81)     | 89.47 (66.90, 98.70)  | 100                                  | 20.00 (2.54, 55.41)  | <0.001  |
| Pain duration (weeks)   | 19.69 (9.51, 29.87)      | 21.89 (12.14, 31.65)  | 20.67 (9.73, 31.60)                  | 14.80 (9.23, 20.37)  | 0.76    |
| VAS                     | 68.46 (59.62, 77.30)     | 66.84 (59.65, 74.04)  | 66.67 (57.96, 75.38)                 | 62.50 (53.38, 71.62) | 0.79    |
| <b>Jianzhen (SI 9)</b>  |                          |                       |                                      |                      |         |
| Age (years)             | 48.22 (41.53, 54.91)     | 48.00 (41.35, 54.65)  | 46.27 (38.65, 53.88)                 | 53.33 (45.49, 61.17) | 0.64    |
| Sex (%females)          | 83.33 (58.57, 96.44)     | 83.33 (58.57, 96.44)  | 93.33 (67.97, 99.83)                 | 33.33 (7.45, 70.06)  | <0.001  |
| Pain duration (weeks)   | 17.11 (9.58, 24.64)      | 18.22 (10.77, 25.67)  | 18.67 (9.70, 27.63)                  | 24.00 (6.74, 41.26)  | 0.78    |
| VAS                     | 67.78 (60.43, 75.13)     | 66.67 (58.85, 74.48)  | 68.00 (59.32, 76.68)                 | 65.00 (53.79, 76.21) | 0.97    |

Values presented as % (for sex) or mean with [95% CI]. Abbreviations: VAS – Visual Analogue Acale.

## DISCUSSION

The current results were in agreement with a peripherally sensitized state at acupoints which is determined by the side-to-side difference of PPT values in patients with unilateral shoulder pain. Central sensitization at acupoints was conducted by comparing pressure sensitivity in patients with age- and sex-matched healthy controls. No obvious PPT values difference was found at the non-acupoint among the painful side, non-painful side and ipsilateral side. To advance this line of research, association between peripheral and central sensitization at acupoints was examined. We found that the patients displayed a significant association between peripheral and central sensitization at measured acupoints. This finding demonstrated that there existed two patterns of sensitization in acupoints. In addition, three acupoints Jianliao (SJ 14), Jianyu (LI 15) and Jianzhen (SI 9) that are normally used for treating shoulder pain had correlation.

Previous investigations had reported that splanchnic diseases can induce mechanical hyperalgesia on the corresponding acupoints when pressed [24]. Acupoints turned to the “activated mode” or “sensitized mode” from the “silent mode” in pathological conditions. This phenomenon is called “acupoint sensitization”. At some acupoints there appeared to be a hypersensitivity of temperature (heat-sensitization) or pain threshold (pain-sensitization) under visceral pain [9, 25]. But unlike those studies, we examined acupoints in patients with musculoskeletal pain in this study.

Central sensitization is challenging clinically, since no standard assessment exists. Some studies recommended the use of various modalities for pain sensitivity at local and distal locations [21, 26]. However, other researches showed that decreased PPTs at the painful and non-painful shoulder, but not at the muscle tibialis anterior [27-29]. According to “Criteria for the Classification of Central Sensitization Pain”, patients with diffuse pain distribution, allodynia, and hyperalgesia are more likely to present with central sensitization. One of the patterns of pain distribution is that patients have bilateral pain/mirror pain [17]. In the patients with shoulder pain, the increased sensitivity to mechanical input in the contralateral shoulder would be interpreted as central sensitization [11]. A large number of studies define central sensitization as pain sensitivity at local and distal locations. We chose bilateral pain to define central sensitization, unlike earlier studies, and to determine whether there existed patterns of experimental pain responses at shoulder acupoints.

1  
2  
3 Collectively, the findings of the study support the alteration in both peripheral and central  
4 sensitization at acupoints in patients with musculoskeletal pain. We determined whether  
5 peripheral and central sensitization were more likely to occur together or alone. In Table 3, we  
6 describe that 19 patients had central sensitization and 13 patients had peripheral sensitization in  
7 Jianyu (LI 15). Previous study showed that long-term peripheral sensitization can lead central  
8 nervous system changes occurring and resulting in central sensitization [11]. However, there  
9 were 6 patients having only central sensitization without peripheral sensitization. This result  
10 indicates that peripheral sensitization is not a prerequisite for the presence of central sensitization  
11 at acupoints. In PSI or CSI, the strong association was found at three acupoints of Jianliao (SJ  
12 14), Jianyu (LI 15) and Jianzhen (SI 9). From the clinical perspective, Jianliao (SJ 14), Jianyu  
13 (LI 15) and Jianzhen (SI 9) are frequently chosen to treat shoulder pain in clinical practice, and  
14 have been called “shoulder three acupoints” by acupuncturists [30, 31]. Jianyu (LI 15), Jianliao  
15 (SJ 14) and Jianzhen (SI 9), are highly-refined acupoints used to treat shoulder pain in the clinic,  
16 and have been proven to be effective at regulating muscle strength and tension of shoulder joint  
17 [32]. The strong association among Jianliao (SJ 14), Jianyu (LI 15) and Jianzhen (SI 9) is  
18 consistent with the conception of Traditional Chinese Medicine.  
19  
20  
21  
22  
23  
24  
25  
26  
27  
28  
29  
30

31 To our knowledge, this is the first study to research peripheral and central sensitization at  
32 acupoints in patients with shoulder pain. One of the advantages of the study is that the measured  
33 acupoints and non-acupoint were marked by an acupuncturist with 24 years of experience in  
34 clinical acupuncture treatment. The evaluator who measured PPTs also has extensive experience  
35 with using the algometer and without basic knowledge of acupoints. The internal validity is  
36 increased by blinding the evaluator who did not know whether the measured sites were acupoints  
37 or not during testing. In addition, the evaluator was blinded as to whether the test participant was  
38 a patient or a healthy control. The participants were asked to take different positions when  
39 different acupoints were measured. For example, the participants were required take a prone  
40 position on the examination bed with a suitable pillow under the chest and the arms close to the  
41 body when Jianzhen (SI 9) was measured. It increases the reliability of testing PPT over a soft  
42 area.  
43  
44  
45  
46  
47  
48  
49  
50  
51

52 Specifically, the result indicates that peripheral and central sensitization at acupoints is not  
53 relevant to pain duration. Moreover, there is no obvious evidence that the pattern of sensitization  
54  
55  
56  
57  
58  
59  
60

1  
2  
3 has relation with the degree of severity of the clinical condition as measured by VAS. These  
4 changes are consistent with the idea of Traditional Chinese Medicine that acupoints are the  
5 crucial reflex points of body lesions under pathological circumstance. Hyperalgesia and skin  
6 sensitization can occur at corresponding acupoints in the presence of some diseases [33].  
7 Morphological structure studies have reported that the nervous system and blood vessels might  
8 have a close relationship with acupoints [34-36]. For example, abundant microvessels existed at  
9 the acupoints of Zhongji (RN3) and Zusanli (ST36) in contrast to the surrounding tissues [37].  
10 The acupoints also have a high density of nerve endings including A- and C- afferent fibers [38,  
11 39]. Those characteristics of higher concentration of neural, vascular elements and mast cells  
12 could make pain perception more sensitive, and might contribute to peripheral sensitivity. To  
13 confirm the specificity of acupoints, we selected a non-acupoint in the infraspinatus muscle.  
14 Obviously, no significant difference was found in PPT values among the painful/non-painful side  
15 of patients and the ipsilateral side of healthy controls. The finding proved that acupoints become  
16 the specifically reflex points that respond to the presence of musculoskeletal pain. Our study  
17 provides evidence that there is an association with acupoints sensitization and gender. Pain  
18 difference in gender has become an increased topic in recent years, and lower PPT values in  
19 women than that in men were found either in healthy subjects or in clinical patients [40]. But, the  
20 significant difference may be accounted for by the fact that the majority of the patients is female  
21 (63.33%) in the study.  
22  
23  
24  
25  
26  
27  
28  
29  
30  
31  
32  
33  
34  
35  
36

37 There are limitations that should be kept in mind regarding this study. Pain perception is  
38 multidimensional. PPT measurements are just a mechanical and standardized stimulation and are  
39 inadequate to describe the complexity of pain perception. The multimodal approach should be  
40 used to provide the details of the pain system in both normal and pathophysiological situations,  
41 such as different stimulus modalities and quantitative assessment of various pain mechanisms.  
42 Second, the non-acupoint was chosen as 2 cm down from Tianzong (SI 11) because the shoulder  
43 blade is relatively flat and may reduce the measurement errors between acupoints and non-  
44 acupoints. In the clinical trial published recently, the distance was 1 cun (2-3 cm) between the  
45 non-acupoints and acupoints, and clinical outcome showed that acupoints treatment alleviated  
46 symptoms superior to non-acupoints treatment [41]. The measured sites are adjacent in some  
47 studies including PPT measured [20, 42]. The distance is 2 cm between the non-acupoint and  
48 Tianzong (SI 11), which is acceptable in our study. For reducing the stimulation effect, there is  
49  
50  
51  
52  
53  
54  
55  
56  
57  
58  
59  
60

1  
2  
3 an approximately 2 min interval between the repetitions. The probability of a possible  
4 stimulation by too close to an acupoint is low but it could not be ruled out completely. In  
5 addition, Ashi points also named reflexing points or tender spots. They are the phenomenon  
6 acupoints or temporary acupoints, which are dissimilar from acupoints of the fourteen meridians  
7 or extraordinary points. Generally, Ashi points have no specific names and definite locations,  
8 and will vanish after disease recovered. The aim of our study is to investigate the pattern of  
9 experimental pain responses at acupoints, which have specific names and definite locations. For  
10 that reason, the Ashi points do not take into account in this study. This study was conducted in a  
11 single institution with a small sample size, so the external validity is not clear. This is a cross-  
12 sectional study, and it's unknown whether the sensitization at acupoints experiences changes as  
13 the disease progresses in longitudinal research. Further studies need to be conducted to confirm  
14 the phenomena observed here.

## 24 CONCLUSIONS

25  
26  
27 In conclusion, there exists a mixed presence of sensitization patterns at acupoints in patients  
28 with unilateral shoulder pain and a strong correlation among Jianliao (SJ 14), Jianyu (LI 15) and  
29 Jianzhen (SI 9). Future research utilizing the multimodal pain approach should be conducted,  
30 such as suprathreshold heat pain response, to determine various sensitivity mechanisms.

## 39 Legends

40  
41  
42 **Figure 1.** The pressure pain assessment sites in the present study. (A) Locations for the pressure  
43 pain threshold (PPT) measurement at Jianliao (SJ 14), Jianyu (LI 15) and Jianzhen (SI 9). (B)  
44 Locations for the PPT measurement at Tianzong (SI 11) and Non-acupoint.

45  
46  
47  
48  
49 **Figure 2.** The values of pressure pain threshold (PPT) at the non-acupoint. Values are mean  $\pm$   
50 SD.

## 55 Footnotes

**Contributors** Conceived and designed the experiments: Qian-Qian Li, Cun-Zhi Liu. Performed the experiments: Guang-Xia Shi, Qing-Nan Fu, Chao-Qun Yan, Qian-Qian Li. Analyzed the data: Li-Wen Zhang, Xue-Rui Wang. Wrote the paper: Chao-Qun Yan, Shuai Zhang. All authors approved the final manuscript.

**Funding** This work was supported by Beijing Municipal Administration of Hospitals Clinical Medicine Development of Special Funding Support grant number XMLX201607 and ZYLX201412.

**Competing interests** We have read and understood BMJ policy on declaration of interests and declare that we have no competing interests.

**Ethics approval** The Research Ethical Committee of Beijing Hospital of Traditional Chinese Medicine Affiliated to Capital Medical University approved the trial.

**Patient consent** Obtained.

**Provenance and peer review** Not commissioned; externally peer reviewed.

**Data Sharing Statement** No additional data are available.

## References

1. WHO Traditional Medicine Strategy: 2014–2023. ISBN: 978 92 4 150609 0 (2013); Available at [http://www.who.int/edicines/publications/traditional/trm\\_strategy14\\_23/en/](http://www.who.int/edicines/publications/traditional/trm_strategy14_23/en/)
2. <http://apps.who.int/medicinedocs/pdf/s4926e/s4926e.pdf>
3. De Kooning M, Tobbacx Y, Meeus M et al. Acupuncture-Analgesia Following a Single Treatment Session in Chronic Whiplash is Unrelated to Autonomic Nervous System Changes: A Randomized Cross-over Trial. *Pain physician* 2015;18(6):527-536.
4. MacPherson H, Tilbrook H, Richmond S et al. Alexander Technique Lessons or Acupuncture Sessions for Persons With Chronic Neck Pain: A Randomized Trial. *Annals of internal medicine* 2015;163(9):653-662.5.
5. Fister DG, Cassileth BR, Deng GE et al. Acupuncture for pain and dysfunction after neck



- 1  
2  
3 dissection: results of a randomized controlled trial. *Journal of clinical oncology*  
4  
5 2010;28(15):2565-2570.  
6  
7  
8 6. Vickers AJ, Cronin AM, Maschino AC et al. Acupuncture for chronic pain: individual  
9  
10 patient data meta-analysis. *Archives of internal medicine* 2012;172(19):1444-1453.  
11  
12  
13 7. Luime JJ, Koes BW, Hendriksen IJ et al. Prevalence and incidence of shoulder pain in the  
14  
15 general population; a systematic review. *Scand. J. Rheumatol.* 2004;33(2):73-81.  
16  
17  
18 8. Luime JJ, Koes BW, Miedem HS et al. High incidence and recurrence of shoulder and  
19  
20 neck pain in nursing home employees was demonstrated during a 2-year follow-up. *J.*  
21  
22 *Clin. Epidemiol.* 2005;58(4):407-413.  
23  
24  
25 9. Rong PJ, Li S, Ben H et al. Peripheral and spinal mechanisms of acupoint sensitization  
26  
27 phenomenon. *Evidence-based complementary and alternative medicine*  
28  
29 2013;2013:742195.  
30  
31  
32 10. Ben H, Li L, Rong PJ et al. Observation of Pain-Sensitive Points along the Meridians in  
33  
34 Patients with Gastric Ulcer or Gastritis. *Evidence-based complementary and alternative*  
35  
36 *medicine* 2012;2012:130802.  
37  
38  
39 11. Borstad J, Woeste C. The role of sensitization in musculoskeletal shoulder pain. *Brazilian*  
40  
41 *journal of physical therapy* 2015;19(4):251-257.  
42  
43  
44 12. Arendt-Nielsen L, Fernández-de-Las-Peñas C, Graven-Nielsen T. Basic aspects of  
45  
46 musculoskeletal pain: from acute to chronic pain. *The Journal of manual & manipulative*  
47  
48 *therapy* 2011;19(4):186-93.  
49  
50  
51 13. Woolf CJ. Central sensitization: implications for the diagnosis and treatment of pain. *Pain*  
52  
53 2011;152(3 Suppl): S2–15.  
54  
55  
56 14. Nijs J, Van Houdenhove B, Oostendorp RA. Recognition of central sensitization in  
57  
58  
59

- 1  
2  
3 patients with musculoskeletal pain: Application of pain neurophysiology in manual  
4  
5 therapy practice. *Manipulation Association of Chartered Physiotherapists* 2010;15:135-  
6  
7 141.
- 8  
9
- 10  
11 15. Staud R, Craggs JG, Robinson ME, et al. Brain activity related to temporal summation of  
12  
13 C-fiber evoked pain. *Pain* 2007;129:130-142.
- 14  
15  
16 16. Meeus M, Nijs J. Central sensitization: A biopsychosocial explanation for chronic  
17  
18 widespread pain in patients with fibromyalgia and chronic fatigue syndrome. *Clinical*  
19  
20 *rheumatology* 2007; 26:465-473.
- 21  
22  
23 17. Nijs J, Torres-Cueco R, van Wilgen CP, et al. Applying modern pain neuroscience in  
24  
25 clinical practice: criteria for the classification of central sensitization pain. *Pain Physician*  
26  
27 2014;17(5):447-57.
- 28  
29  
30 18. Smarr KL, Keefer AL. Measures of depression and depressive symptoms: Beck  
31  
32 Depression Inventory-II (BDI-II), Center for Epidemiologic Studies Depression Scale  
33  
34 (CES-D), Geriatric Depression Scale (GDS), Hospital Anxiety and Depression Scale  
35  
36 (HADS), an Patient Health Questionnaire-9 (PHQ-9). *Arthritis care & research* 2011;63  
37  
38 Suppl 11:S454-466.
- 39  
40 19. Zheng HB, Zheng YP. [The application of Beck Depression Inventory in depression  
41  
42 patients]. *Chinese Journal of Nervous and Mental Diseases*. 1987;13(4):236
- 43  
44 20. Ge HY, Fernandez-de-Las-Penas C, Madeleine P, Arendt-Nielsen L. Topographical  
45  
46 mapping and mechanical pain sensitivity of myofascial trigger points in the infraspinatus  
47  
48 muscle. *European journal of pain* 2008;12(7):859-865.
- 49  
50  
51 21. Paul TM, Soo Hoo J, Chae J, Wilson RD. Central hypersensitivity in patients with  
52  
53 subacromial impingement syndrome. *Arch. Phys. Med. Rehabil.* 2012;93(12):2206-2209.
- 54  
55  
56 22. Coronado RA, Simon CB, Valencia C, George SZ. Experimental pain responses support  
57  
58  
59  
60

- 1  
2  
3 peripheral and central sensitization in patients with unilateral shoulder pain. *The Clinical*  
4  
5 *journal of pain* 2014;30(2):143-151.  
6  
7
- 8 23. Neziri AY, Scaramozzino P, Andersen OK, et al. Reference values of mechanical and  
9 thermal pain tests in a pain-free population. *European journal of pain*. 2011;15(4):376-83.  
10  
11
- 12 24. Chae Y, Kim HY, Lee HJ et al. The alteration of pain sensitivity at disease-specific  
13 acupuncture points in premenstrual syndrome. *The journal of physiological sciences*  
14  
15 2007;57(2):115-119.  
16  
17
- 18 25. Peles S, Miranda A, Shaker R, Sengupta JN. Acute nociceptive somatic stimulus  
19 sensitizes neurones in the spinal cord to colonic distension in the rat. *The Journal of*  
20  
21  
22  
23  
24  
25 *physiology* 2004;560(Pt 1):291-302.  
26
- 27 26. Nijs J, Van Houdenhove B, Oostendorp RA. Recognition of central sensitization in  
28 patients with musculoskeletal pain: Application of pain neurophysiology in manual  
29  
30  
31  
32  
33  
34  
35  
36  
37  
38  
39  
40  
41  
42  
43  
44  
45  
46  
47  
48  
49  
50  
51  
52  
53  
54  
55  
56  
57  
58  
59  
60
27. Ge HY, Fernández-de-las-Peñas C, Arendt-Nielsen L. Sympathetic facilitation of  
hyperalgesia evoked from myofascial tender and trigger points in patients with unilateral  
shoulder pain. *Clinical neurophysiology*. 2006;117:1545–1550.
28. Albuquerque-Sendín F, Camargo PR, Vieira A, et al. Bilateral myofascial trigger points  
and pressure pain thresholds in the shoulder muscles in patients. *The Clinical journal of*  
*pain*. 2013;29(6):478-86.
29. Gwilym SE, Oag HC, Tracey I, et al. Evidence that central sensitisation is present in  
patients with shoulder impingement syndrome and influences the outcome after surgery.  
*The Journal of bone and joint surgery. British volume*. 2011;93(4):498-502.

- 1  
2  
3 30. Chen L. [A new thinking of acupuncture and moxibustion treatment of shoulder pain  
4 After hemiplegia]. *Zhongguo zhen jiu = Chinese acupuncture & moxibustion*  
5  
6 2006;26(9):669-671.  
7  
8  
9  
10 31. Li N, Tian FW, Wang CW et al. [Double-center randomized controlled trial on post-  
11 stroke shoulder pain treated by electroacupuncture combined with Tuina]. *Zhongguo zhen*  
12  
13 *jiu = Chinese acupuncture & moxibustion* 2012;32(2):101-105.  
14  
15  
16  
17 32. Chen MY, Pu QQ, Liu SY, Jiang ZY. [Efficacy comparison of different stimulation  
18 therapies for periartthritis of shoulder]. *Zhongguo zhen jiu = Chinese acupuncture &*  
19  
20 *moxibustion* 2013;33(2):109-112.  
21  
22  
23  
24 33. Li L, Yu L, Rong P et al. Visceral nociceptive afferent facilitates reaction of subnucleus  
25 reticularis dorsalis to acupoint stimulation in rats. *Evidence-based complementary and*  
26  
27 *alternative medicine* 2013;2013:931283.  
28  
29  
30  
31 34. Kuo TC, Lin CW, Ho FM. The soreness and numbness effect of acupuncture on skin  
32 blood flow. *The American journal of Chinese medicine* 2004;32(1):117-129.  
33  
34  
35  
36 35. Zhang D, Yan X, Zhang X et al. Synchrotron radiation phase-contrast X-ray CT imaging  
37 of acupuncture points. *Analytical and bioanalytical chemistry* 2011;401(3):803-808.  
38  
39  
40  
41 36. Wick F, Wick N, Wick MC. Morphological analysis of human acupuncture points  
42 through immunohistochemistry. *American journal of physical medicine & rehabilitation /*  
43  
44 *Association of Academic Physiatrists* 2007;86(1):7-11.  
45  
46  
47  
48 37. Oh DS, Kang W, Choi SM, Son CG. Effect of acupuncture for gastrointestinal activity  
49 differs depending on the pathophysiological condition. *Acupuncture in medicine : journal*  
50  
51 *of the British Medical Acupuncture Society* 2011;29(4):316-317.  
52  
53  
54  
55 38. Li AH, Zhang JM, Xie YK. Human acupuncture points mapped in rats are associated

- 1  
2  
3 with excitable muscle/skin-nerve complexes with enriched nerve endings. *Brain research*  
4  
5 2004;1012(1-2):154-159.  
6  
7  
8 39. Zhu B, Xu WD, Rong PJ et al. A C-fiber reflex inhibition induced by electroacupuncture  
9  
10 with different intensities applied at homotopic and heterotopic acupoints in rats  
11 selectively destructive effects on myelinated and unmyelinated afferent fibers. *Brain*  
12 *research* 2004;1011(2):228-237.  
13  
14  
15  
16 40. Tschugg A, Loscher WN, Hartmann S et al. Gender Influences Radicular Pain Perception  
17 in Patients with Lumbar Disc Herniation. *J Womens Health* 2015;24(9):771-776.  
18  
19  
20  
21 41. Liu Z, Yan S, Wu J, et al. Acupuncture for Chronic Severe Functional Constipation: A  
22 Randomized Trial. *Annals of Internal Medicine*. 2016;12(6);165(11):761-769.  
23  
24  
25  
26 42. Binderup AT, Arendt-Nielsen L, Madeleine P. Pressure pain threshold mapping of the  
27 trapezius muscle reveals heterogeneity in the distribution of muscular hyperalgesia after  
28 eccentric exercise. *European Journal of Pain*. 2010;14(7):705-12.  
29  
30  
31  
32  
33  
34  
35  
36  
37  
38  
39  
40  
41  
42  
43  
44  
45  
46  
47  
48  
49  
50  
51  
52  
53  
54  
55  
56  
57  
58  
59  
60

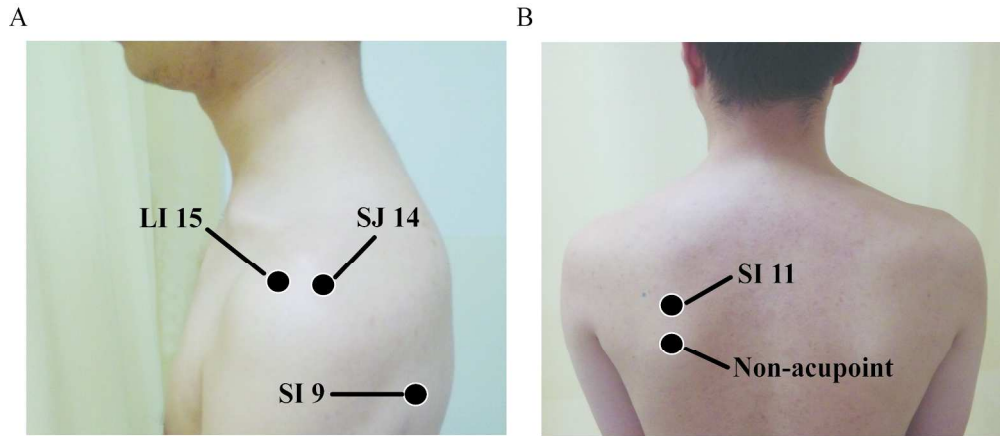

233x101mm (300 x 300 DPI)

Peer review only

1  
2  
3  
4  
5  
6  
7  
8  
9  
10  
11  
12  
13  
14  
15  
16  
17  
18  
19  
20  
21  
22  
23  
24  
25  
26  
27  
28  
29  
30  
31  
32  
33  
34  
35  
36  
37  
38  
39  
40  
41  
42  
43  
44  
45  
46  
47  
48  
49  
50  
51  
52  
53  
54  
55  
56  
57  
58  
59  
60

1  
2  
3  
4  
5  
6  
7  
8  
9  
10  
11  
12  
13  
14  
15  
16  
17  
18  
19  
20  
21  
22  
23  
24  
25  
26  
27  
28  
29  
30  
31  
32  
33  
34  
35  
36  
37  
38  
39  
40  
41  
42  
43  
44  
45  
46  
47  
48  
49  
50  
51  
52  
53  
54  
55  
56  
57  
58  
59  
60



96x88mm (300 x 300 DPI)

BMJ

**Appendix Table 1.** Locations for the pressure pain assessment sites in the present study.

| Points           | Location                                                                                                                                                                                                                                                                 |
|------------------|--------------------------------------------------------------------------------------------------------------------------------------------------------------------------------------------------------------------------------------------------------------------------|
| Jianliao (SJ 14) | In the depression posterior and inferior to the acromion when arm is abducted.                                                                                                                                                                                           |
| Jianyu (LI 15)   | In the depression between the acromial extremity of the clavicle and the great tuberosity of humerus; or when the arm is in full abduction, the acupoint is in the depression at the anterior border of the acromioclavicular joint, and superior to the shoulder joint. |
| Jianzhen (SI 9)  | 1 cun directly above the posterior end of the axillary fold when the arm is abducted.                                                                                                                                                                                    |
| Tianzong (SI 11) | In the depression in the center of the subscapular fossa, at the point 1/3 of the line between the lower border of the mesoscapula and lower angle of capula.                                                                                                            |
| Non-acupoint     | 2 cm down to Tianzong (SI 11).                                                                                                                                                                                                                                           |

**Appendix Table 2.** Correlation of peripheral sensitization index (PSI) among acupoints.

|                  | PSI             |                  |                |                 |
|------------------|-----------------|------------------|----------------|-----------------|
|                  | Tianzong (SI11) | Jianliao (SJ 14) | Jianyu (LI 15) | Jianzhen (SI 9) |
| Tianzong (SI11)  | 1.00            | 0.26             | 0.32           | 0.35            |
| Jianliao (SJ 14) | 0.26            | 1.00             | 0.73*          | 0.62*           |
| Jianyu (LI 15)   | 0.32            | 0.73*            | 1.00           | 0.44*           |
| Jianzhen (SI 9)  | 0.35            | 0.62*            | 0.44*          | 1.00            |

Values are Pearson's correlation. \*Significant association between variables ( $p < 0.01$ ).



**Appendix Table 3.** Correlation between peripheral sensitization index (PSI) and relevant baseline characteristics.

|                       | PSI              |                  |                |                 |
|-----------------------|------------------|------------------|----------------|-----------------|
|                       | Tianzong (SI 11) | Jianliao (SJ 14) | Jianyu (LI 15) | Jianzhen (SI 9) |
| Age (years)           | -0.28            | -0.13            | -0.21          | -0.22           |
| Pain duration (weeks) | 0.21             | 0.20             | -0.10          | -0.20           |
| VAS                   | 0.24             | 0.16             | 0.27           | -0.12           |

Values are Pearson's correlation.

**Appendix Table 4.** Correlation of central sensitization index (CSI) among acupoints.

|                  | CSI             |                  |                |                 |
|------------------|-----------------|------------------|----------------|-----------------|
|                  | Tianzong (SI11) | Jianliao (SJ 14) | Jianyu (LI 15) | Jianzhen (SI 9) |
| Tianzong (SI11)  | 1.00            | 0.09             | 0.11           | 0.17            |
| Jianliao (SJ 14) | 0.09            | 1.00             | 0.59*          | 0.25            |
| Jianyu (LI 15)   | 0.11            | 0.59*            | 1.00           | 0.51*           |
| Jianzhen (SI 9)  | 0.17            | 0.25             | 0.51*          | 1.00            |

Values are Pearson's correlation. \*Significant association between variables ( $p < 0.01$ ).

**Appendix Table 5.** Correlation between central sensitization index (CSI) and relevant baseline characteristics.

|                       | CSI              |                  |                |                 |
|-----------------------|------------------|------------------|----------------|-----------------|
|                       | Tianzong (SI 11) | Jianliao (SJ 14) | Jianyu (LI 15) | Jianzhen (SI 9) |
| Age (years)           | -0.10            | -0.12            | -0.32          | -0.24           |
| Pain duration (weeks) | 0.13             | 0.29             | -0.16          | -0.05           |
| VAS                   | 0.33             | 0.21             | 0.04           | 0.01            |

Values are Pearson's correlation.

**Appendix Table 6.** Correlation between peripheral sensitization index (PSI) and central sensitization index (CSI).

|                  | CSI             |                  |                |                 |
|------------------|-----------------|------------------|----------------|-----------------|
|                  | Tianzong (SI11) | Jianliao (SJ 14) | Jianyu (LI 15) | Jianzhen (SI 9) |
| <b>PSI</b>       |                 |                  |                |                 |
| Tianzong (SI11)  | 0.48*           | 0.15             | 0.40*          | 0.52*           |
| Jianliao (SJ 14) | 0.17            | 0.39*            | 0.58*          | 0.62*           |
| Jianyu (LI 15)   | 0.32            | 0.36             | 0.53*          | 0.58*           |
| Jianzhen (SI 9)  | 0.17            | 0.25             | 0.65*          | 0.58*           |

Values are Pearson's correlation. \*Significant association between variables ( $p < 0.05$ ).

STROBE Statement—Checklist of items that should be included in reports of *case-control studies*

|                              | Item No    | Recommendation                                                                                                                                                                                                                                                                                                                                                                           |
|------------------------------|------------|------------------------------------------------------------------------------------------------------------------------------------------------------------------------------------------------------------------------------------------------------------------------------------------------------------------------------------------------------------------------------------------|
| <b>Title and abstract</b>    | 1 (P1-2)   | (a) Indicate the study's design with a commonly used term in the title or the abstract<br>(b) Provide in the abstract an informative and balanced summary of what was done and what was found                                                                                                                                                                                            |
| <b>Introduction</b>          |            |                                                                                                                                                                                                                                                                                                                                                                                          |
| Background/rationale         | 2 (P4)     | Explain the scientific background and rationale for the investigation being reported                                                                                                                                                                                                                                                                                                     |
| Objectives                   | 3 (P4)     | State specific objectives, including any prespecified hypotheses                                                                                                                                                                                                                                                                                                                         |
| <b>Methods</b>               |            |                                                                                                                                                                                                                                                                                                                                                                                          |
| Study design                 | 4 (P4)     | Present key elements of study design early in the paper                                                                                                                                                                                                                                                                                                                                  |
| Setting                      | 5 (P5-7)   | Describe the setting, locations, and relevant dates, including periods of recruitment, exposure, follow-up, and data collection                                                                                                                                                                                                                                                          |
| Participants                 | 6          | (a) Give the eligibility criteria, and the sources and methods of case ascertainment and control selection. Give the rationale for the choice of cases and controls (P5)<br>(b) For matched studies, give matching criteria and the number of controls per case (P5-6)                                                                                                                   |
| Variables                    | 7 (P6-7)   | Clearly define all outcomes, exposures, predictors, potential confounders, and effect modifiers. Give diagnostic criteria, if applicable                                                                                                                                                                                                                                                 |
| Data sources/<br>measurement | 8* (P6-7)  | For each variable of interest, give sources of data and details of methods of assessment (measurement). Describe comparability of assessment methods if there is more than one group                                                                                                                                                                                                     |
| Bias                         | 9 (P6-7)   | Describe any efforts to address potential sources of bias                                                                                                                                                                                                                                                                                                                                |
| Study size                   | 10 (P5)    | Explain how the study size was arrived at                                                                                                                                                                                                                                                                                                                                                |
| Quantitative variables       | 11 (P7)    | Explain how quantitative variables were handled in the analyses. If applicable, describe which groupings were chosen and why                                                                                                                                                                                                                                                             |
| Statistical methods          | 12         | (a) Describe all statistical methods, including those used to control for confounding (P7)<br>(b) Describe any methods used to examine subgroups and interactions (P8)<br>(c) Explain how missing data were addressed (No missing data)<br>(d) If applicable, explain how matching of cases and controls was addressed (No missing data)<br>(e) Describe any sensitivity analyses (NONE) |
| <b>Results</b>               |            |                                                                                                                                                                                                                                                                                                                                                                                          |
| Participants                 | 13*        | (a) Report numbers of individuals at each stage of study—eg numbers potentially eligible, examined for eligibility, confirmed eligible, included in the study, completing follow-up, and analysed (P8)<br>(b) Give reasons for non-participation at each stage (No missing data)<br>(c) Consider use of a flow diagram (NONE)                                                            |
| Descriptive data             | 14*        | (a) Give characteristics of study participants (eg demographic, clinical, social) and information on exposures and potential confounders (P8)<br>(b) Indicate number of participants with missing data for each variable of interest (No missing data)                                                                                                                                   |
| Outcome data                 | 15* (NONE) | Report numbers in each exposure category, or summary measures of exposure                                                                                                                                                                                                                                                                                                                |

|                                           |                          |                    |                                                                                                                                                                                                                                                                                                                                                                                                                                                         |
|-------------------------------------------|--------------------------|--------------------|---------------------------------------------------------------------------------------------------------------------------------------------------------------------------------------------------------------------------------------------------------------------------------------------------------------------------------------------------------------------------------------------------------------------------------------------------------|
| 1<br>2<br>3<br>4<br>5<br>6<br>7<br>8<br>9 | Main results             | 16                 | (a) Give unadjusted estimates and, if applicable, confounder-adjusted estimates and their precision (eg, 95% confidence interval). Make clear which confounders were adjusted for and why they were included <b>(P8-11)</b><br>(b) Report category boundaries when continuous variables were categorized <b>(P11)</b><br>(c) If relevant, consider translating estimates of relative risk into absolute risk for a meaningful time period <b>(NONE)</b> |
| 10<br>11<br>12<br>13<br>14                | Other analyses           | 17 <b>(P8)</b>     | Report other analyses done—eg analyses of subgroups and interactions, and sensitivity analyses                                                                                                                                                                                                                                                                                                                                                          |
| 15                                        | <b>Discussion</b>        |                    |                                                                                                                                                                                                                                                                                                                                                                                                                                                         |
| 16                                        | Key results              | 18 <b>(P14)</b>    | Summarise key results with reference to study objectives                                                                                                                                                                                                                                                                                                                                                                                                |
| 17<br>18<br>19                            | Limitations              | 19 <b>(P16–17)</b> | Discuss limitations of the study, taking into account sources of potential bias or imprecision. Discuss both direction and magnitude of any potential bias                                                                                                                                                                                                                                                                                              |
| 20<br>21<br>22<br>23                      | Interpretation           | 20 <b>(P14–16)</b> | Give a cautious overall interpretation of results considering objectives, limitations, multiplicity of analyses, results from similar studies, and other relevant evidence                                                                                                                                                                                                                                                                              |
| 24                                        | Generalisability         | 21 <b>(P17)</b>    | Discuss the generalisability (external validity) of the study results                                                                                                                                                                                                                                                                                                                                                                                   |
| 25                                        | <b>Other information</b> |                    |                                                                                                                                                                                                                                                                                                                                                                                                                                                         |
| 26<br>27<br>28                            | Funding                  | 22 <b>(P18)</b>    | Give the source of funding and the role of the funders for the present study and, if applicable, for the original study on which the present article is based                                                                                                                                                                                                                                                                                           |

\*Give information separately for cases and controls.

**Note:** An Explanation and Elaboration article discusses each checklist item and gives methodological background and published examples of transparent reporting. The STROBE checklist is best used in conjunction with this article (freely available on the Web sites of PLoS Medicine at <http://www.plosmedicine.org/>, Annals of Internal Medicine at <http://www.annals.org/>, and Epidemiology at <http://www.epidem.com/>). Information on the STROBE Initiative is available at <http://www.strobe-statement.org>.
